# Supplementary material
Source: PubMed Central journal article supplement (PMC2631548)
Supplement: NIHMS61354-supplement-si20060902_063.pdf [file NIHMS61354-supplement-si20060902_063.pdf]

**SUPPLEMENTARY MATERIAL****Trisubstituted (*E*)-Alkene Dipeptide Isosteres as  $\beta$ -Turn Promoters in the Gramicidin S Cyclodecapeptide Scaffold**

Jingbo Xiao,<sup>§</sup> Bernard Weisblum<sup>#</sup> and Peter Wipf<sup>\*,§</sup>

*<sup>§</sup>Department of Chemistry and Center for Chemical Methodologies & Library Development, University of Pittsburgh, Pittsburgh, Pennsylvania 15260, and*

*<sup>#</sup>Pharmacology Department, University of Wisconsin Medical School, 1300 University Avenue, Madison, Wisconsin 53706*

[pwipf@pitt.edu](mailto:pwipf@pitt.edu)

Experimental procedures and spectral data for all new compounds, including copies of <sup>1</sup>H and <sup>13</sup>C NMR spectra for **3**, **4**, **5**, **6**, **7**, **8**, **10** (298 and 338 K), **Cbz<sub>2</sub>GS** and 2D NMR spectra of **10** and **Cbz<sub>2</sub>GS**; T-shift plots for **10** and **Cbz<sub>2</sub>GS**.

**General.** All moisture-sensitive reactions were performed using syringe-septum cap techniques under an N<sub>2</sub> atmosphere and all glassware was dried in an oven at 150 °C for 2 h prior to use. Reactions carried out at -78 °C employed a CO<sub>2</sub>-acetone bath. THF was distilled over sodium / benzophenone ketyl; CH<sub>2</sub>Cl<sub>2</sub>, toluene and Et<sub>3</sub>N were distilled from CaH<sub>2</sub>. Me<sub>2</sub>Zn was purchased from Aldrich Company.

Reactions were monitored by TLC analysis (EM Science pre-coated silica gel 60 F<sub>254</sub> plates, 250 μm layer thickness) and visualization was accomplished with a 254 nm UV light and by staining with a PMA solution (5 g of phosphomolybdic acid in 100 mL of 95% EtOH) or a Vaughn's reagent (4.8 g (NH<sub>4</sub>)<sub>6</sub>Mo<sub>7</sub>O<sub>24</sub>•4H<sub>2</sub>O, 0.2 g Ce(SO<sub>4</sub>)<sub>2</sub>•4H<sub>2</sub>O in 10 mL conc. H<sub>2</sub>SO<sub>4</sub> and 90 mL H<sub>2</sub>O). Flash chromatography on SiO<sub>2</sub> or deactivated SiO<sub>2</sub> (1% Et<sub>3</sub>N in mobile phase) was used to purify the crude reaction mixtures.

Infrared spectra were determined on a Nicolet Avatar 360 FT-IR spectrometer. Circular dichroism spectra were obtained on a JASCO 715 spectrometer at 0.1 mM concentration in anhydrous EtOH solution. <sup>1</sup>H NMR and <sup>13</sup>C NMR spectra were obtained on Bruker Avance 300, 500 or 600 MHz instruments. <sup>1</sup>H NMR spectra are tabulated as follows: chemical shift, multiplicity (s = singlet, d = doublet, t = triplet, q = quartet, qn = quintet, m = multiplet), number of protons, and coupling constant(s). Mass spectra were obtained on a Waters Autospec double focusing mass spectrometer (EI) or a Waters Q-ToF mass spectrometer (ESI). A Varian HPLC system a Gilson 215 Liquid Handler

equipped with a *semi-prep* C<sub>18</sub> column (Varian 250 mm × 10 mm, 10 μm particle size, 60 Å, with 5 mL/min flow rate, or a Varian Dynamax 250 mm × 21.4 mm, Microsorb 60-8, with 10 mL/min flow rate) and a fraction collector was used for purification. A Varian HPLC system equipped with an analytical chiral column (Chiralcel OD, 250 × 4.6 mm, 1.0 mL/min) was used for normal phase HPLC analysis. LC-MS data were obtained on an Agilent 1100 instrument, using an analytical C<sub>18</sub> column (Waters Xterra MS 100 × 4.6 mm, 3.5 μm, 0.4 mL/min).

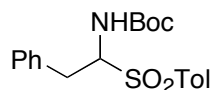

**[1-(4-Methylbenzenesulfonyl)-2-phenylethyl]carbamic acid *tert*-butyl ester (3).** A mixture of 5.43 g (46.4 mmol) of H<sub>2</sub>N-Boc, 8.35 g (69.5 mmol) of phenylacetaldehyde, and 10.8 g (69.1 mmol) of TolSO<sub>2</sub>H in 200 mL of dry ether was stirred at room temperature overnight. The resulting white precipitate was filtered off, washed with ether, and dried *in vacuo* to yield 10.5 g (61%) of **3** as a colorless powder: IR (neat) 3431, 1697, 1639, 1454, 1313, 1303, 1141, 1087 cm<sup>-1</sup>; <sup>1</sup>H NMR (600 MHz, DMSO-*d*<sub>6</sub>) δ 8.05 (d, 1 H, *J* = 9.8 Hz), 7.74 (d, 2 H, *J* = 8.2 Hz), 7.42 (d, 2 H, *J* = 8.0 Hz), 7.27-7.24 (m, 4 H), 7.21-7.18 (m, 1 H), 4.91 (ddd, 1 H, *J* = 10.8, 10.8, 2.5 Hz), 3.32 (dd, 1 H, *J* = 14.0, 2.4 Hz), 2.94 (dd, 1 H, *J* = 13.8, 12.1 Hz), 2.36 (s, 3H), 1.06 (s, 9 H); <sup>13</sup>C NMR (150 MHz, DMSO-*d*<sub>6</sub>) δ 154.1, 144.4, 136.0, 133.8, 129.6, 129.2, 129.1, 128.3, 126.7, 78.8, 72.5, 31.3, 27.7, 21.0; HRMS (ESI) *m/z* calcd for C<sub>20</sub>H<sub>25</sub>NO<sub>4</sub>SNa (M+Na) 398.1402, found 398.1422.

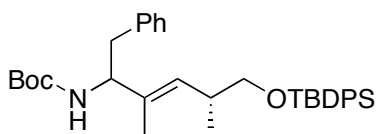

**[(1*SR*,2*E*,4*R*)-1-Benzyl-5-(*tert*-butyldiphenylsilyloxy)-2,4-dimethylpent-2-enyl]carbamic acid *tert*-butyl ester (**4**). A solution of 337 mg (1.00 mmol) of **2** in 2.00 mL of dry CH<sub>2</sub>Cl<sub>2</sub> was treated at room temperature with 335 mg (1.30 mmol) of Cp<sub>2</sub>ZrHCl. The reaction mixture was stirred at room temperature for 20 min, until a clear yellow solution was formed. The resulting yellow solution was cooled to –78 °C, treated over a period of 30 min with 500 μL (1.00 mmol) of Me<sub>2</sub>Zn (2.0 M solution in toluene), stirred at –78 °C for 10 min, warmed to 0 °C over a period of 5 min and treated at 0 °C with another solution of 188 mg (500 μmol) of **3** in 1.50 mL of dry CH<sub>2</sub>Cl<sub>2</sub>. The reaction mixture was stirred at 0 °C for 2 h, quenched with saturated NH<sub>4</sub>Cl solution, diluted with Et<sub>2</sub>O, filtered through a thin pad of celite, and extracted with Et<sub>2</sub>O. The organic layer was dried (MgSO<sub>4</sub>), concentrated *in vacuo*, and purified by chromatography on SiO<sub>2</sub> (100 : 1, CHCl<sub>3</sub>/Et<sub>2</sub>O) to yield 180 mg (64%) of **4** as a colorless, oily ~ 1 : 1 mixture of diastereomers: IR (neat) 3444, 3358, 3274, 3070, 3028, 2961, 2930, 2858, 1701, 1495, 1473, 1390, 1365, 1247, 1169, 1112, 1080, 824, 739, 701 cm<sup>-1</sup>; <sup>1</sup>H NMR (600 MHz, CDCl<sub>3</sub>) δ 7.69-7.66 (m, 4 H), 7.45-7.40 (m, 6 H), 7.22-7.09 (m, 5 H), 4.94 (d, 0.5 H, *J* = 8.7 Hz), 4.93 (d, 0.5 H, *J* = 7.9 Hz), 4.52 (b, 1 H), 4.23 (b, 1 H), 3.47 (dd, 0.5 H, *J* = 9.0, 5.5 Hz), 3.40-3.35 (m, 1 H), 3.25 (dd, 0.5 H, *J* = 9.7, 8.0 Hz), 2.87-2.70 (m, 2 H), 2.62-2.52 (m, 1 H), 1.60 (s, 1.5 H), 1.57**

(s, 1.5 H), 1.38 (s, 9 H), 1.07 (s, 9 H), 0.99 (d, 1.5 H,  $J = 6.6$  Hz), 0.89 (d, 1.5 H,  $J = 6.4$  Hz);  $^{13}\text{C}$  NMR (125 MHz,  $\text{CDCl}_3$ )  $\delta$  155.1, 138.0, 135.6, 133.9, 129.5, 129.3, 129.0, 128.9, 128.6, 128.1, 127.6, 126.2, 125.1, 79.1, 68.2, 68.1, 57.9, 40.1 (2C), 35.1, 28.3, 26.8, 19.2, 17.2, 17.1, 14.0; HRMS (ESI)  $m/z$  calcd for  $\text{C}_{35}\text{H}_{47}\text{NO}_3\text{SiNa}$  (M+Na) 580.3223, found 580.3245.

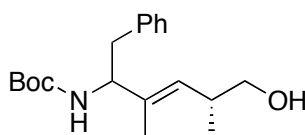

**[(1SR,2E,4R)-Benzyl-5-hydroxyl-2,4R-dimethylpent-2-enyl]carbamic acid *tert*-butyl ester (5).** A solution of 233 mg (418  $\mu\text{mol}$ ) of **4** in 10.0 mL of dry THF was treated at 0 °C with 835  $\mu\text{L}$  (835  $\mu\text{mol}$ ) of TBAF (1.0 M solution in THF). The reaction mixture was stirred at 0 °C for 2 h and room temperature overnight, diluted with EtOAc, and washed with brine. The organic layer was dried ( $\text{Na}_2\text{SO}_4$ ), concentrated *in vacuo*, and purified by chromatography on  $\text{SiO}_2$  (from 4 : 1 to 2 : 1, hexane/EtOAc) to yield 62.3 mg (47%) of **5** as a colorless, oily ~ 1 : 1 mixture of diastereomers: IR (neat) 3424, 3342, 3086, 3062, 3028, 2975, 2929, 2870, 1693, 1497, 1454, 1366, 1249, 1171, 1032, 865, 737, 700  $\text{cm}^{-1}$ ;  $^1\text{H}$  NMR (300 MHz,  $\text{CDCl}_3$ )  $\delta$  7.32-7.14 (m, 5 H), 4.92 (d, 0.5 H,  $J = 9.7$  Hz), 4.83 (d, 0.5 H,  $J = 9.6$  Hz), 4.72 (bd, 0.5 H,  $J = 6.4$  Hz), 4.72 (bd, 0.5 H,  $J = 6.4$  Hz), 4.63 (bd, 0.5 H,  $J = 5.3$  Hz), 4.25-4.15 (m, 1 H), 3.46 (dd, 0.5 H,  $J = 10.3, 5.1$  Hz), 3.34 (dd, 0.5 H,  $J = 10.6, 5.3$  Hz), 3.23 (t, 0.5 H,  $J = 9.7$  Hz), 3.01 (dd, 0.5 H,  $J = 10.6, 8.9$  Hz), 2.91 (dd, 0.5 H,  $J = 13.5, 6.6$  Hz), 2.72-2.86 (m, 2 H), 2.66-2.51 (m, 1 H),

1.67 (s, 3 H), 1.42 (s, 4.5 H), 1.39 (s, 4.5 H), 0.85 (d, 1.5 H,  $J = 6.7$  Hz), 0.79 (d, 1.5 H,  $J = 6.7$  Hz);  $^{13}\text{C}$  NMR (75 MHz,  $\text{CDCl}_3$ )  $\delta$  155.3, 155.1, 138.0, 137.6, 135.7, 129.1, 128.4 (2C), 126.6, 126.5, 125.1, 79.5, 67.6, 59.5, 39.7, 39.4, 35.3, 28.3, 16.4, 16.2; HRMS (ESI)  $m/z$  calcd for  $\text{C}_{19}\text{H}_{29}\text{NO}_3\text{Na}$  ( $\text{M}+\text{Na}$ ) 342.2045, found 342.2049.

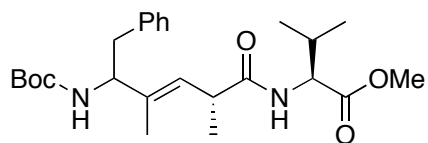

***D,L*-Phe- $\psi$ [(*E*)-C(CH<sub>3</sub>)=CH]-Ala-Val-OMe (6 + 7).** A solution of 110 mg (0.259 mmol) of **5** in 10.0 mL of dry  $\text{CH}_2\text{Cl}_2$  was treated at 0 °C with 122 mg (0.287 mmol) of Dess-Martin periodinane. The reaction mixture was stirred at 0 °C for 1 h and at room temperature for an additional 2 h, quenched with saturated  $\text{Na}_2\text{S}_2\text{O}_3$  in a saturated  $\text{NaHCO}_3$  solution, stirred for 30 min at room temperature, and extracted with  $\text{CH}_2\text{Cl}_2$ . The organic layer was dried ( $\text{Na}_2\text{SO}_4$ ), concentrated *in vacuo* to give a colorless foam and subsequently dissolved in 6.00 mL of THF. The solution was treated at 0 °C with 1.24 mL (2.48 mmol) of 2-methyl-2-butene (2.0 M solution in THF) followed by another solution of 70.3 mg (0.777 mmol) of  $\text{NaClO}_2$  and 71.5 mg (0.518 mmol) of  $\text{NaH}_2\text{PO}_4 \cdot \text{H}_2\text{O}$  in 6.00 mL of  $\text{H}_2\text{O}$ . The reaction mixture was stirred at 0 °C for 1 h and at room temperature for an additional 4 h, extracted with EtOAc, and washed with  $\text{H}_2\text{O}$ . The organic layer was dried ( $\text{Na}_2\text{SO}_4$ ), concentrated *in vacuo* and re-dissolved in 5.00 mL of  $\text{CHCl}_3$ . The solution was treated at 0 °C with 38.5 mg (0.285 mmol) of HOBt, 49.7 mg

(0.259 mmol) of EDC, and 65.2 mg (0.389 mmol) of Val-OMe • HCl followed 108  $\mu$ L (0.777 mmol) of triethylamine. The reaction mixture was stirred at room temperature for 36 h, diluted with  $\text{CHCl}_3$ , and washed with brine. The organic layer was dried ( $\text{Na}_2\text{SO}_4$ ), concentrated *in vacuo*, and purified by chromatography on  $\text{SiO}_2$  (from 2 : 1 to 1 : 1, hexanes/EtOAc) to yield 145 mg (94%) of **6** and **7** as a colorless, foamy ~ 1 : 1 mixture of diastereomers. The two diastereomers were separated by RP-HPLC ( $\text{C}_{18}$ ; linear gradient 70% to 100%  $\text{CH}_3\text{CN}$  ( $\text{H}_2\text{O}$ ) in 30 min; 10 mL/min).

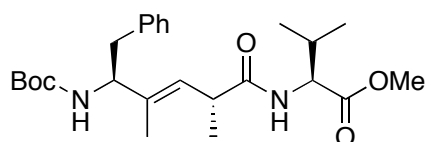

**Phe- $\psi$ [(*E*)-C( $\text{CH}_3$ )=CH]-Ala-Val-OMe (**6**).** Faster eluting isomer;  $[\alpha]_{\text{D}}^{25} - 3.9$  (*c* 1.0,  $\text{CHCl}_3$ ); IR (neat) 3325, 3027, 2968, 2931, 2868, 1744, 1698, 1650, 1519, 1455, 1391, 1366, 1249, 1206, 1171, 1013, 868, 749, 700  $\text{cm}^{-1}$ ;  $^1\text{H}$  NMR (600 MHz,  $\text{CDCl}_3$ )  $\delta$  7.31-7.27 (m, 2 H), 7.23-7.21 (m, 1 H), 7.17-7.16 (m, 2 H), 6.23 (b, 1 H), 5.32 (d, 1 H,  $J = 8.3$  Hz), 4.59 (b, 1 H), 4.46 (dd, 1 H,  $J = 8.4, 5.3$  Hz), 4.27 (bs, 1 H), 3.73 (s, 3 H), 3.22 (dq, 1 H,  $J = 8.6, 7.0$  Hz), 2.96 (bd, 1 H,  $J = 7.4$  Hz), 2.77 (dd, 1 H,  $J = 14.0, 8.1$  Hz), 2.14-2.08 (m, 1 H), 1.76 (s, 3 H), 1.36 (s, 9 H), 1.24 (d, 3 H,  $J = 7.0$  Hz), 0.90 (d, 3 H,  $J = 6.8$  Hz), 0.87 (d, 3 H,  $J = 6.9$  Hz);  $^{13}\text{C}$  NMR (150 MHz,  $\text{CDCl}_3$ )  $\delta$  174.1, 172.5, 155.0, 138.8, 137.4, 129.2, 128.4, 126.6, 124.9, 79.3, 57.1, 52.0, 40.0, 39.6, 30.9, 29.7, 28.3, 18.9, 17.9 (2C), 14.9; HRMS (ESI)  $m/z$  calcd for  $\text{C}_{25}\text{H}_{38}\text{N}_2\text{O}_5\text{Na}$  ( $\text{M}+\text{Na}$ ) 469.2678, found

469.2657; LC-MS ( $R_t$  11.2 min, linear gradient 50% to 80%  $\text{CH}_3\text{CN}$  in 15 min, 0.4 mL/min;  $m/z = 469.3$   $[\text{M}+\text{Na}]^+$ ).

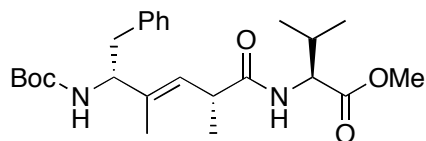

**$D$ -Phe- $\psi$ [(*E*)-C( $\text{CH}_3$ )=CH]-Ala-Val-OMe (7).** Slower eluting isomer;  $[\alpha]_D^{25} -$  11.0 ( $c$  1.0,  $\text{CHCl}_3$ ); IR (neat) 3325, 3032, 2967, 2930, 2872, 1745, 1701, 1655, 1519, 1455, 1391, 1366, 1248, 1205, 1171, 1001, 866, 741, 700  $\text{cm}^{-1}$ ;  $^1\text{H}$  NMR (600 MHz,  $\text{CDCl}_3$ )  $\delta$  7.30-7.27 (m, 2 H), 7.23-7.21 (m, 1 H), 7.17-7.16 (m, 2 H), 6.51 (bs, 1 H), 5.25 (d, 1 H,  $J = 8.1$  Hz), 4.64 (b, 1 H), 4.43 (b, 1 H), 4.24 (bd, 1 H,  $J = 5.7$  Hz), 3.70 (s, 3 H), 3.15 (dq, 1 H,  $J = 8.9, 7.1$  Hz), 2.84 (dd, 1 H,  $J = 13.7, 7.1$  Hz), 2.78 (dd, 1 H,  $J = 13.6, 7.7$  Hz), 2.17 (octet, 1 H,  $J = 6.6$  Hz), 1.70 (s, 3 H), 1.37 (s, 9 H), 1.12 (d, 3 H,  $J = 7.0$  Hz), 0.91 (d, 3 H,  $J = 6.6$  Hz), 0.87 (d, 3 H,  $J = 6.6$  Hz);  $^{13}\text{C}$  NMR (150 MHz,  $\text{CDCl}_3$ )  $\delta$  174.1, 172.5, 155.1, 138.5, 137.4, 129.0, 128.4, 127.0, 126.6, 79.3, 59.6, 57.5, 51.8, 39.6, 30.6, 29.7, 28.3, 19.0, 18.2, 17.5, 12.3; HRMS (ESI)  $m/z$  calcd for  $\text{C}_{25}\text{H}_{38}\text{N}_2\text{O}_5\text{Na}$  ( $\text{M}+\text{Na}$ ) 469.2678, found 469.2661; LC-MS ( $R_t$  11.6 min, linear gradient 50% to 80%  $\text{CH}_3\text{CN}$  in 15 min, 0.4 mL/min;  $m/z = 469.3$   $[\text{M}+\text{Na}]^+$ ).



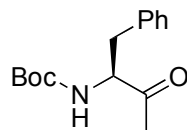

**(S)-tert-Butyl-3-oxo-1-phenylbutan-2-ylcarbamate (12 from ozonolysis of 6).** Through a solution of 5.1 mg (11  $\mu\text{mol}$ ) of **6** in 1.0 mL of  $\text{CH}_2\text{Cl}_2$  and 1.0 mL of MeOH was bubbled  $\text{O}_3$  at  $-78\text{ }^\circ\text{C}$  until a blue color formed. Subsequently,  $\text{N}_2$  was bubbled through the solution to remove excess  $\text{O}_3$  until the blue color disappeared. The reaction mixture was treated at  $-78\text{ }^\circ\text{C}$  with one drop of  $\text{Me}_2\text{S}$ , stirred at  $-78\text{ }^\circ\text{C}$  for 2 h and at room temperature overnight, and concentrated *in vacuo*. The residue was purified by chromatography on  $\text{SiO}_2$  (4 : 1, hexanes/EtOAc) to yield 2.5 mg (83%) of **12** as a colorless foam:  $^1\text{H}$  NMR (300 MHz,  $\text{CDCl}_3$ )  $\delta$  7.34-7.25 (m, 3 H), 7.18-7.14 (m, 2 H), 5.13 (bd, 1 H,  $J = 7.1$  Hz), 4.55 (q, 1 H,  $J = 6.6$  Hz), 3.11 (dd, 1 H,  $J = 13.9, 6.5$  Hz), 2.99 (dd, 1 H,  $J = 14.0, 6.6$  Hz), 2.14 (s, 3 H), 1.42 (s, 9 H); HPLC (Chiralcel OD,  $250 \times 4.6$  mm,  $R_t$  7.30 min, 5% *i*-PrOH (hexanes), 1.0 mL/min).

**(S)-tert-Butyl-3-oxo-1-phenylbutan-2-ylcarbamate (12 from Boc-<sup>L</sup>Phe-OH (11)).** According to a literature procedure,<sup>1</sup> **12** was prepared from Boc-<sup>L</sup>Phe-OH (**11**) as a colorless foam:  $^1\text{H}$  NMR (300 MHz,  $\text{CDCl}_3$ )  $\delta$  7.34-7.25 (m, 3 H), 7.18-7.14 (m, 2 H), 5.13 (bd, 1 H,  $J = 6.4$  Hz), 4.55 (q, 1 H,  $J = 6.8$  Hz), 3.11 (dd, 1 H,  $J = 13.9, 6.4$  Hz), 2.99 (dd, 1 H,  $J = 14.0, 6.4$  Hz), 2.14 (s, 3 H), 1.42 (s, 9

<sup>1</sup> Pace, R. D.; Kabalka, G. W. *J. Org. Chem.* **1995**, *60*, 4838.

H); HPLC (Chiralcel OD, 250 × 4.6 mm,  $R_t$  7.27 min, 5% *i*PrOH (hexanes), 1.0 mL/min).

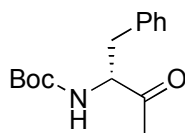

**(*R*)-tert-Butyl-3-oxo-1-phenylbutan-2-ylcarbamate (12*R* from Boc-<sup>*D*</sup>Phe-OH).** According to a literature procedure,<sup>1</sup> **12*R*** was prepared from Boc-<sup>*D*</sup>Phe-OH as a colorless foam: <sup>1</sup>H NMR (300 MHz, CDCl<sub>3</sub>) δ 7.34-7.23 (m, 3 H), 7.18-7.14 (m, 2 H), 5.13 (bd, 1 H, *J* = 5.9 Hz), 4.55 (q, 1 H, *J* = 6.7 Hz), 3.11 (dd, 1 H, *J* = 13.9, 6.5 Hz), 2.99 (dd, 1 H, *J* = 13.9, 6.5 Hz), 2.14 (s, 3 H), 1.42 (s, 9 H); HPLC (Chiralcel OD, 250 × 4.6 mm,  $R_t$  6.64 min, 5% *i*-PrOH (hexanes), 1.0 mL/min).

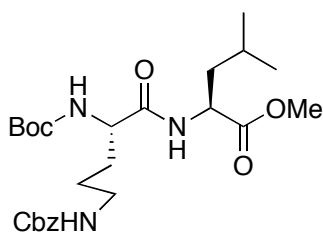

**Boc-Orn(Cbz)-Leu-OMe.** A mixture of 545 mg (3.00 mmol) of Leu-OMe • HCl, 1.00 g (2.73 mmol) of Boc-Orn(Cbz)-OH, 405 mg (3.00 mmol) of HOBt, and 523 mg (2.73 mmol) of EDC in 30.0 mL of CHCl<sub>3</sub> was treated at 0 °C with 936 μL (6.72 mmol) of triethylamine. The reaction mixture was stirred at 0 °C for 1 h and at room temperature overnight, and washed with 5% citric acid, 5% of Na<sub>2</sub>CO<sub>3</sub> solution and H<sub>2</sub>O. The organic layer was dried (Na<sub>2</sub>SO<sub>4</sub>) and concentrated *in*

*vacuo* to yield 1.28 g (95%) of **Boc-Orn(Cbz)-Leu-OMe** as a colorless foam: IR (neat) 3526, 3324, 3066, 2957, 2871, 1701, 1659, 1529, 1455, 1391, 1367, 1251, 1165, 1025, 866, 777, 740, 698  $\text{cm}^{-1}$ ;  $^1\text{H}$  NMR (600 MHz,  $\text{CDCl}_3$ )  $\delta$  7.36-7.27 (m, 5 H), 6.92 (b, 1 H), 5.27 (b, 1 H), 5.16 (b, 1 H), 5.11, 5.06 (AB, 2 H,  $J = 12.4$  Hz), 4.55 (b, 1 H), 4.31 (b, 1 H), 3.69 (s, 3 H), 3.41 (b, 1 H), 3.20-3.10 (m, 1 H), 1.90-1.80 (m, 1 H), 1.73-1.65 (m, 1 H), 1.65-1.50 (m, 5 H), 1.43 (s, 9 H), 0.92 (d, 3 H,  $J = 6.0$  Hz), 0.91 (d, 3 H,  $J = 5.6$  Hz);  $^{13}\text{C}$  NMR (150 MHz,  $\text{CDCl}_3$ )  $\delta$  173.2, 172.2, 157.0, 155.7, 136.5, 128.4, 128.0, 79.7, 66.6, 52.8, 52.1, 50.7, 41.0, 39.6, 30.0, 28.2, 26.1, 24.7, 22.8, 21.6; HRMS (ESI)  $m/z$  calcd for  $\text{C}_{25}\text{H}_{39}\text{N}_3\text{O}_7\text{Na}$  ( $\text{M}+\text{Na}$ ) 516.2686, found 516.2656.

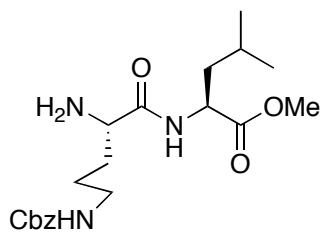

**H-Orn(Cbz)-Leu-OMe.** A solution of 113 mg (0.228 mmol) of **Boc-Orn(Cbz)-Leu-OMe** in 2.40 mL (9.60 mmol) of HCl (4.0 N solution in 1,4-dioxane) was stirred at 0 °C for 10 min and at room temperature for an additional 50 min. 1,4-Dioxane was removed *in vacuo* and the colorless, foamy residue was dissolved in 20.0 mL of  $\text{CHCl}_3$  and washed with 5%  $\text{Na}_2\text{CO}_3$  solution and  $\text{H}_2\text{O}$ . The organic layer was dried ( $\text{Na}_2\text{SO}_4$ ) and concentrated *in vacuo* to yield **H-Orn(Cbz)-Leu-OMe** as a colorless foam that was used immediately without further purification.



$J = 13.4, 8.2$  Hz), 2.15 (b, 1 H), 2.03 (b, 1 H), 1.95-1.85 (m, 1 H), 1.75-1.50 (m, 5 H), 1.66 (s, 3 H), 1.37 (s, 9 H), 1.08 (d, 3 H,  $J = 6.9$  Hz), 1.00-0.85 (m, 12 H);  $^{13}\text{C}$  NMR (125 MHz,  $\text{CDCl}_3$ )  $\delta$  174.7, 173.2, 171.5 (2C), 157.1, 155.2, 138.0, 137.5, 136.6, 129.1, 128.5 (2C), 128.0, 126.6, 79.4, 66.6, 59.4, 52.2, 51.7, 50.8, 41.0, 39.7, 30.0, 29.5, 28.3, 26.0, 24.8, 22.8, 21.7, 19.3, 18.5, 17.4, 12.8; HRMS (ESI)  $m/z$  calcd for  $\text{C}_{44}\text{H}_{65}\text{N}_5\text{O}_9\text{Na}$  ( $\text{M}+\text{Na}$ ) 830.4680, found 830.4666; LC-MS ( $R_t$  7.95 min, linear gradient 70% to 95%  $\text{CH}_3\text{CN}$  in 10 min, 95%  $\text{CH}_3\text{CN}$  from 10 to 20 min, 0.4 mL/min;  $m/z = 830.4$  [ $\text{M}+\text{Na}$ ] $^+$ ).

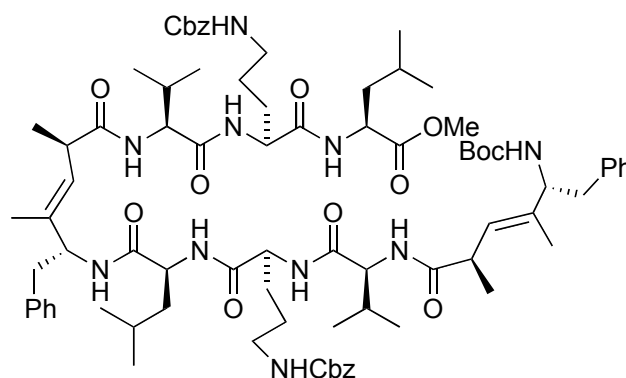

**Boc- $^D$ Phe- $\psi$ [( $E$ )-C(CH $_3$ )=CH]-Ala-Val-Orn(Cbz)-Leu- $^D$ Phe- $\psi$ [( $E$ )-C(CH $_3$ )=CH]-Ala-Val-Orn(Cbz)-Leu-OMe (9).** A solution of 33.0 mg (40.8  $\mu\text{mol}$ ) of **8** in 4.50 mL of MeOH was treated at 0  $^\circ\text{C}$  with 408  $\mu\text{L}$  (408  $\mu\text{mol}$ ) of 1 N NaOH. The reaction mixture was stirred at 0  $^\circ\text{C}$  for 1 h and at room temperature for an additional 6 h, treated with 408  $\mu\text{L}$  (408  $\mu\text{mol}$ ) of 1 N HCl and extracted with  $\text{CHCl}_3$ . The organic layer was dried ( $\text{Na}_2\text{SO}_4$ ) and concentrated *in vacuo* to afford the crude acid as a colorless foam.

A solution of 33.0 mg (40.8  $\mu\text{mol}$ ) of **8** in 2.64 mL (10.6 mmol) of HCl (4.0 N solution in 1,4-dioxane) was stirred at 0 °C for 10 min and at room temperature for an additional 40 min. 1,4-Dioxane was removed *in vacuo* and the colorless, foamy residue was dissolved in 30.0 mL of  $\text{CHCl}_3$  and washed with 5%  $\text{Na}_2\text{CO}_3$  solution. The organic layer was dried ( $\text{Na}_2\text{SO}_4$ ) and concentrated *in vacuo* to give the crude amine as a colorless foam.

A solution of acid and amine in 8.50 mL of  $\text{CHCl}_3$  was treated at room temperature with 6.1 mg (44.9  $\mu\text{mol}$ ) of HOBt, 9.4 mg (49.0  $\mu\text{mol}$ ) of EDC and 5.0 mg (40.8  $\mu\text{mol}$ ) of DMAP. The reaction mixture was stirred at room temperature for 60 h, concentrated *in vacuo*, and purified by chromatography on  $\text{SiO}_2$  (20 : 1,  $\text{CHCl}_3/\text{MeOH}$ ) to yield 60.0 mg (99%) of **9** as a colorless foam that was used directly without further purification: HRMS (ESI)  $m/z$  calcd for  $\text{C}_{82}\text{H}_{118}\text{N}_{10}\text{O}_{15}\text{Na}$  (M+Na) 1505.8676, found 1505.8679; LC-MS ( $R_t$  11.6 min, linear gradient 70% to 95%  $\text{CH}_3\text{CN}$  in 10 min, 95%  $\text{CH}_3\text{CN}$  from 10 to 20 min, 0.4 mL/min;  $m/z = 1383.6$  [M-Boc] $^+$ ).

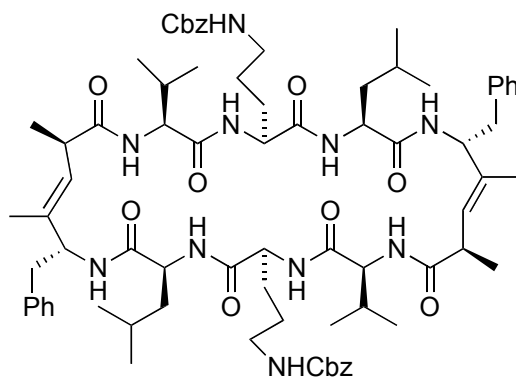

**Cyclo[(<sup>D</sup>Phe-ψ[(*E*)-C(CH<sub>3</sub>)=CH]-Ala-Val-Orn(Cbz)-Leu)<sub>2</sub>] (10).** A solution of 46.7 mg (31.5 μmol) of **9** in 3.60 mL of MeOH was treated at room temperature with 315 μL (315 μmol) of 1 N NaOH. The reaction mixture was stirred at room temperature for 16 h and treated with 315 μL (315 μmol) of 1 N HCl. Solvents were removed *in vacuo* and 4.00 mL (16.0 mmol) of HCl (4.0 N solution in 1,4-dioxane) was added at 0 °C. The solution was stirred at 0 °C for 10 min and at room temperature for an additional 40 min. 1,4-Dioxane was removed *in vacuo* and the colorless, foamy residue was dissolved in 10.0 mL of benzene, treated at room temperature with 26.5 mg (315 μmol) of NaHCO<sub>3</sub>, and evaporated to dryness by azeotropic distillation with benzene at 25 °C. The solid residue was diluted with 26.3 mL of CHCl<sub>3</sub> and treated at room temperature with 4.7 mg (34.7 μmol) of HOBt, 7.2 mg (37.8 μmol) of EDC, and 3.8 mg (31.5 μmol) of DMAP. The reaction mixture was stirred at room temperature for 36 h, concentrated *in vacuo*, purified by chromatography on SiO<sub>2</sub> (20 : 1, CHCl<sub>3</sub>/MeOH) and repurified by RP-HPLC (C<sub>18</sub>; from 90% to 100% MeOH (H<sub>2</sub>O) in 20 min, 100% MeOH (H<sub>2</sub>O) from 20 to 30 min, 10 mL/min) to yield 21.2 mg (50%) of **10** as a colorless solid: Mp 263-266 °C (MeOH/H<sub>2</sub>O); [α]<sub>D</sub><sup>25</sup> -119 (*c* 0.1, CHCl<sub>3</sub>); IR (neat) 3269, 3065,

2959, 2931, 2871, 1699, 1632, 1525, 1455, 1258, 1142, 1028, 750, 698  $\text{cm}^{-1}$ ;  $^1\text{H}$  NMR (600 MHz,  $\text{DMSO-}d_6$ , 298K)  $\delta$  8.37 (bd, 4 H,  $J = 7.5$  Hz), 8.08 (d, 2 H,  $J = 6.9$  Hz), 7.35-7.27 (m, 10 H), 7.23-7.18 (m, 8 H), 7.16-7.11 (m, 4 H), 7.07 (d, 2 H,  $J = 7.8$  Hz), 5.15 (d, 2 H,  $J = 9.7$  Hz), 4.98, 4.96 (AB, 4 H,  $J = 13.2$  Hz), 4.66 (bq, 2 H,  $J = 7.0$  Hz), 4.37 (q, 2 H,  $J = 7.8$  Hz), 4.33 (t, 2 H,  $J = 7.8$  Hz), 4.19 (q, 2 H,  $J = 7.4$  Hz), 3.02-2.95 (m, 2 H), 2.95-2.87 (m, 4 H), 2.84 (dd, 2 H,  $J = 13.6, 8.0$  Hz), 2.68 (dd, 2 H,  $J = 13.5, 7.4$  Hz), 2.03 (octet, 2 H,  $J = 6.8$  Hz), 1.58-1.50 (m, 2 H), 1.50-1.40 (m, 2 H), 1.48 (s, 6 H), 1.35-1.25 (m, 8 H), 1.30-1.18 (m, 2 H), 0.93 (d, 6 H,  $J = 7.0$  Hz), 0.79 (d, 6 H,  $J = 6.7$  Hz), 0.77 (d, 6 H,  $J = 6.8$  Hz), 0.75 (d, 6 H,  $J = 6.3$  Hz), 0.73 (d, 6 H,  $J = 6.2$  Hz);  $^{13}\text{C}$  NMR (150 MHz,  $\text{DMSO-}d_6$ , 298K)  $\delta$  172.2, 171.1, 170.7, 170.5, 156.0, 138.5, 137.1, 136.6, 129.0, 128.4, 128.3, 127.9, 127.7 (2C), 126.0, 65.2, 59.9, 57.1, 52.0, 50.7, 41.2, 40.2, 38.5, 36.9, 30.9, 30.1, 26.0, 24.0, 22.5 (2C), 18.9, 18.3, 17.6, 10.4;  $^1\text{H}$  NMR (600 MHz,  $\text{DMSO-}d_6$ , 338K)  $\delta$  8.19 (d, 2 H,  $J = 8.9$  Hz), 8.15 (d, 2 H,  $J = 6.7$  Hz), 8.01 (d, 2 H,  $J = 8.7$  Hz), 7.34-7.28 (m, 10 H), 7.24-7.19 (m, 8 H), 7.16-7.13 (m, 2 H), 7.00 (d, 2 H,  $J = 9.2$  Hz), 6.89 (b, 2 H), 5.18 (dd, 2 H,  $J = 9.6, 1.0$  Hz), 4.99 (s, 4 H), 4.67 (q, 2 H,  $J = 7.7$  Hz), 4.39 (q, 2 H,  $J = 7.7$  Hz), 4.35 (dd, 2 H,  $J = 9.1, 7.0$  Hz), 4.24 (q, 2 H,  $J = 7.4$  Hz), 3.00-2.90 (m, 6 H), 2.87 (dd, 2 H,  $J = 13.8, 7.9$  Hz), 2.71 (dd, 2 H,  $J = 13.8, 7.5$  Hz), 2.05 (octet, 2 H,  $J = 6.8$  Hz), 1.61-1.55 (m, 2 H), 1.54-1.45 (m, 2 H), 1.49 (s, 6 H), 1.41-1.32 (m, 8 H), 1.27-1.21 (m, 2 H), 0.96 (d, 6 H,  $J = 7.0$  Hz), 0.82 (d, 6 H,  $J = 6.8$  Hz), 0.80 (d, 6 H,  $J = 6.8$  Hz), 0.77 (d, 6 H,  $J = 6.5$  Hz), 0.75 (d, 6 H,  $J = 6.3$  Hz);  $^{13}\text{C}$  NMR (150 MHz,  $\text{DMSO-}d_6$ , 338K)  $\delta$



171.9, 170.9, 170.5, 170.3, 155.7, 138.2, 137.0, 136.4, 128.6, 128.3, 127.9, 127.6, 127.3, 127.2, 125.7, 64.9, 59.5, 56.9, 51.8, 50.5, 40.8, 40.0, 38.4, 36.7, 30.7, 29.8, 25.6, 23.8, 22.2, 22.1, 18.6, 17.9, 17.2, 10.1; HRMS (ESI)  $m/z$  calcd for  $C_{76}H_{106}N_{10}O_{12}Na$  (M+Na) 1373.7889, found 1373.7872; LC-MS ( $R_t$  14.3 min, linear gradient 70% to 95%  $CH_3CN$  in 10 min, 95%  $CH_3CN$  from 10 to 20 min, 0.4 mL/min;  $m/z$  = 1351.5  $[M+H]^+$ , 1374.4  $[M+Na]^+$ ).

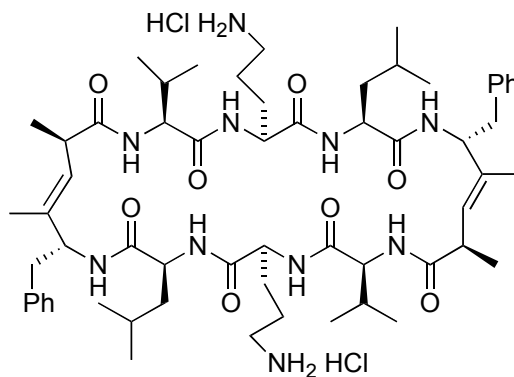

**Cyclo[(<sup>p</sup>Phe-ψ[(*E*)-C(CH<sub>3</sub>)=CH]-Ala-Val-Orn-Leu)<sub>2</sub>] • 2HCl (1•2HCl).** A solution of 1.7 mg (1.3 μmol) of **10** in 0.74 mL of a 0.02 M HCl solution in MeOH was treated at room temperature with 1.8 mg of 10% Pd/C. The reaction mixture was hydrogenated at room temperature under H<sub>2</sub> (1 atm) for 3 h, filtered through a pad of celite, concentrated *in vacuo*, dissolved in H<sub>2</sub>O, and lyophilized to yield 1.5 mg (quant.) of **1•2HCl** as a colorless powder: ESI-MS  $m/z$  1083.6 (M-2HCl+H), 1106.6 (M-2HCl+Na); HRMS (ESI)  $m/z$  calcd for  $C_{60}H_{95}N_{10}O_8$  (M-2HCl+H) 1083.7334, found 1083.7269.

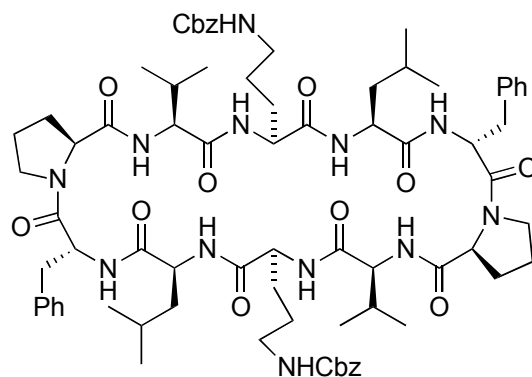

**Cyclo[(Val-Orn(Cbz)-Leu-<sup>D</sup>Phe-Pro)<sub>2</sub>] (Cbz<sub>2</sub>GS).** Prepared as a colorless solid:<sup>2</sup> Mp 52-53 °C (hexanes/Et<sub>2</sub>O); <sup>1</sup>H NMR (600 MHz, DMSO-*d*<sub>6</sub>) δ 8.94 (d, 2 H, *J* = 3.2 Hz), 8.58 (d, 2 H, *J* = 9.1 Hz), 8.38 (d, 2 H, *J* = 8.9 Hz), 7.34-7.27 (m, 12 H), 7.20-7.16 (m, 8 H), 7.13-7.10 (m, 4 H), 4.99, 4.96 (AB, 4 H, *J* = 12.6 Hz), 4.80-4.75 (m, 2 H), 4.57 (q, 2 H, *J* = 7.9 Hz), 4.42 (dd, 2 H, *J* = 9.1, 7.2 Hz), 3.35 (d, 2 H, *J* = 8.1 Hz), 4.33-4.30 (m, 2 H), 3.51 (bt, 2 H, *J* = 9.3 Hz), 3.00-2.90 (m, 6 H), 2.83 (t, 2 H, *J* = 11.4 Hz), 2.39 (q, 2 H, *J* = 8.8 Hz), 2.05-1.95 (m, 2 H), 1.95-1.87 (m, 2 H), 1.75-1.65 (m, 2 H), 1.50-1.35 (m, 12 H), 1.35-1.20 (m, 6 H), 0.79 (d, 12 H, *J* = 6.6 Hz), 0.78 (d, 6 H, *J* = 6.7 Hz), 0.75 (d, 6 H, *J* = 6.7 Hz); <sup>13</sup>C NMR (150 MHz, DMSO-*d*<sub>6</sub>) δ 171.7, 170.7, 170.5, 170.4, 169.6, 155.9, 137.2, 136.3, 129.2, 128.3, 128.1, 127.7, 127.6, 126.7, 65.2, 59.7, 56.6, 53.7, 51.3, 49.5, 45.7, 41.0, 40.2, 35.7, 31.3, 29.9, 25.2, 24.0, 23.0, 22.7, 22.5, 19.0, 18.0; HRMS (ESI) *m/z* calcd for C<sub>76</sub>H<sub>104</sub>N<sub>12</sub>O<sub>14</sub>Na (M+Na) 1431.7693, found 1431.7726; LC-MS (R<sub>t</sub>

<sup>2</sup> (a) Xiao, J.; Weisblum, B.; Wipf, P. *J. Am. Chem. Soc.* **2005**, *127*, 5742. (b) Wipf, P.; Xiao, J.; Jiang, J.; Belikova, N. A.; Tyurin, V. A.; Fink, M. P.; Kagan, V. E. *J. Am. Chem. Soc.* **2005**, *127*, 12460.

14.2 min, linear gradient 70% to 95% CH<sub>3</sub>CN in 10 min, 95% CH<sub>3</sub>CN from 10 to 20 min, 0.4 mL/min;  $m/z = 1409.6$  [M+H]<sup>+</sup>).

xjb-5-179, DMSO-d6, 298K, 600MHZ

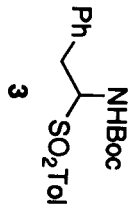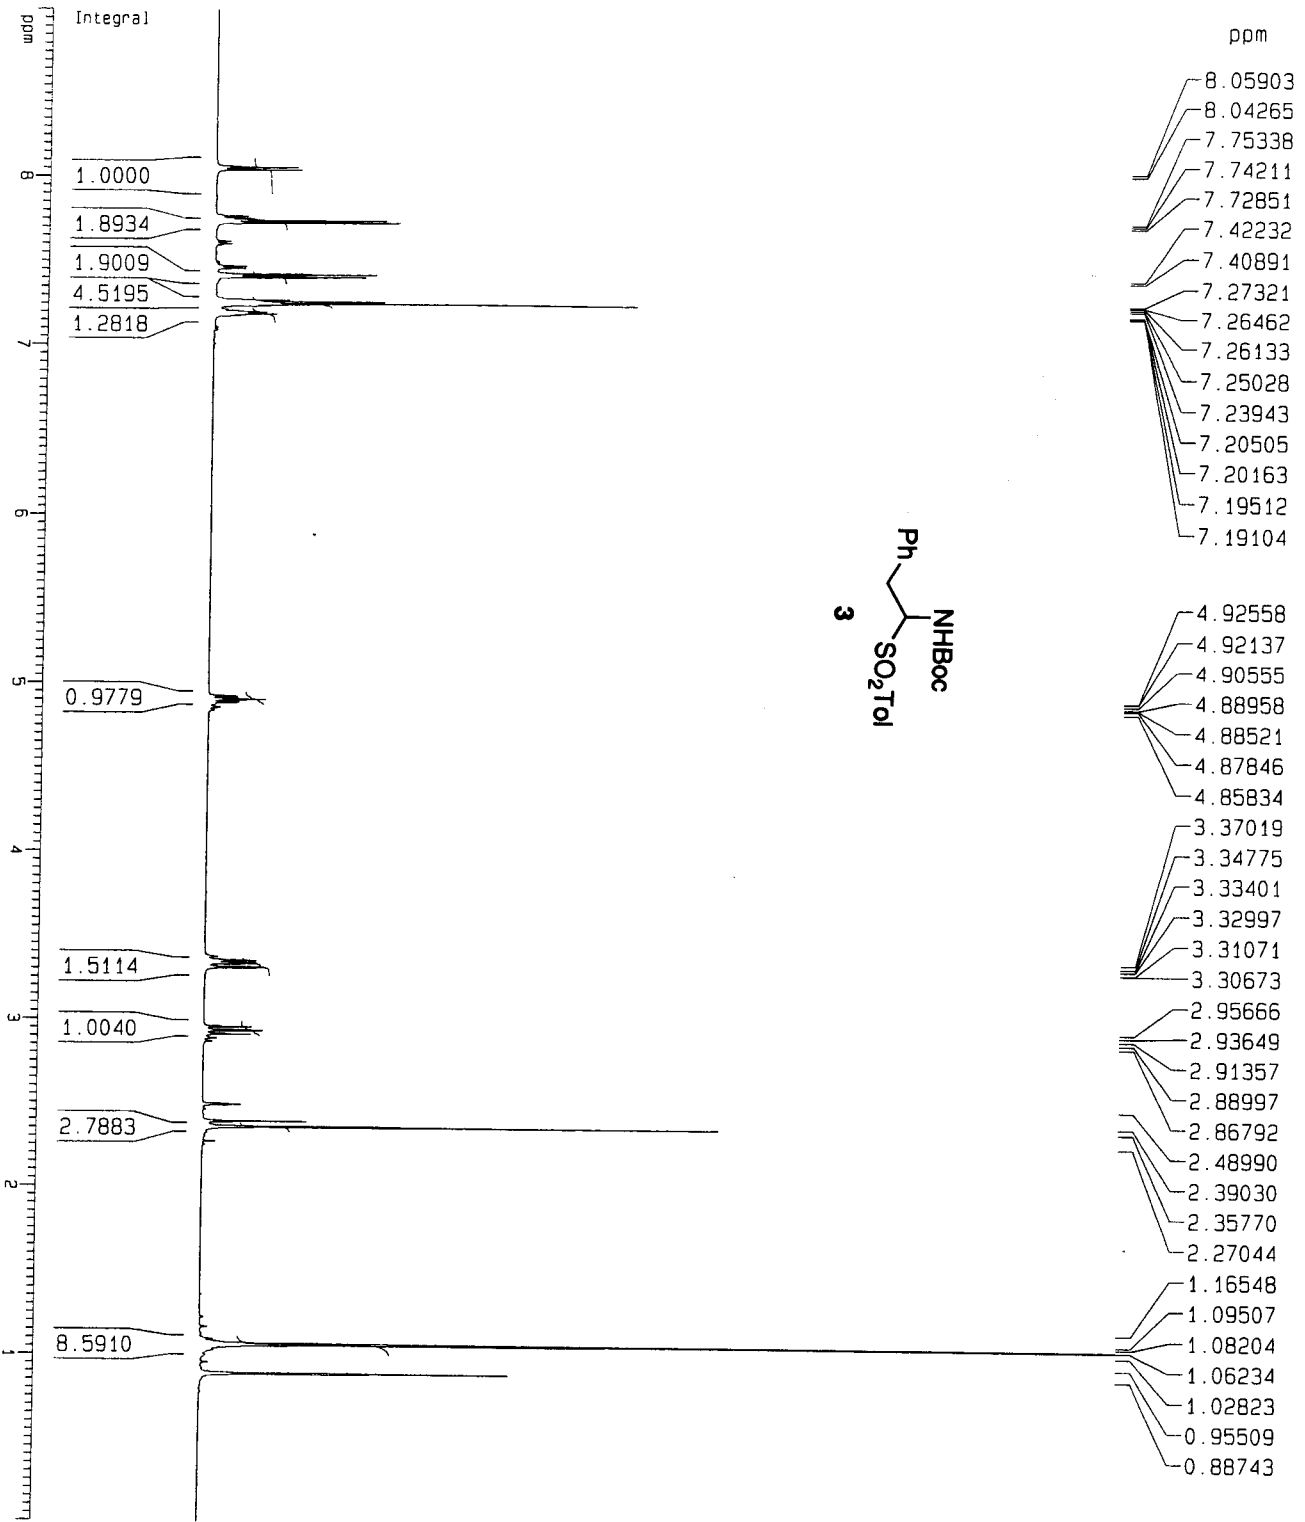

Current Data Parameters  
 NAME xjb-5-179-600  
 EXPNO 1  
 PROCNO 1

F2 - Acquisition Parameters:  
 Date\_ 20050303  
 Time 21.13  
 INSTRUM spect  
 PROBHD 5 mm TBI 1H/  
 PULPROG zg  
 TD 65536  
 SOLVENT CDCl2  
 NS 8  
 DS 0  
 SWH 8992.806 Hz  
 FIDRES 0.137219 Hz  
 AQ 3.6438515 sec  
 RG 1  
 DW 55.600 usec  
 DE 6.00 usec  
 TE 290.0 K  
 D1 3.00000000 sec

==== CHANNEL f1 ===  
 NUC1 1H  
 P1 9.00 usec  
 PL1 0.00 dB  
 SFO1 600.8336050 MHz

F2 - Processing parameters  
 SI 65536  
 SF 600.8300107 MHz  
 WDW EM  
 SSB 0  
 LB 0.10 Hz  
 GB 0  
 PC 1.00

1D NMR plot parameters  
 CX 20.00 cm  
 F1P 9.000 ppr  
 F1 5407.47 Hz  
 F2P 0.000 ppr  
 F2 0.00 Hz  
 PPMCM 0.45000 ppr  
 HZCM 270.37350 Hz

xjb-5-179-600, DMSO, rt, 150MHz C13

Current Data Parameters  
 NAME xjb-5-179-600  
 EXPNO 13  
 PROCNO 1

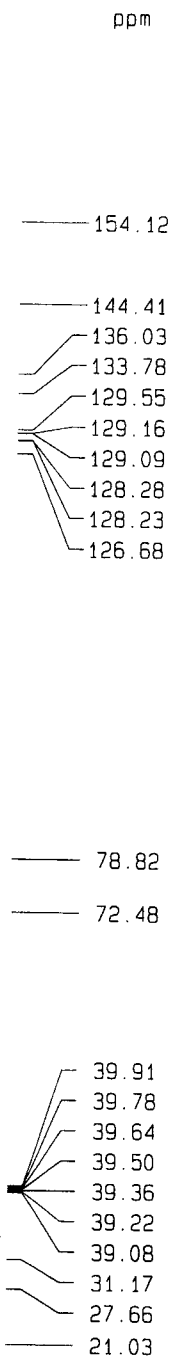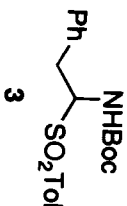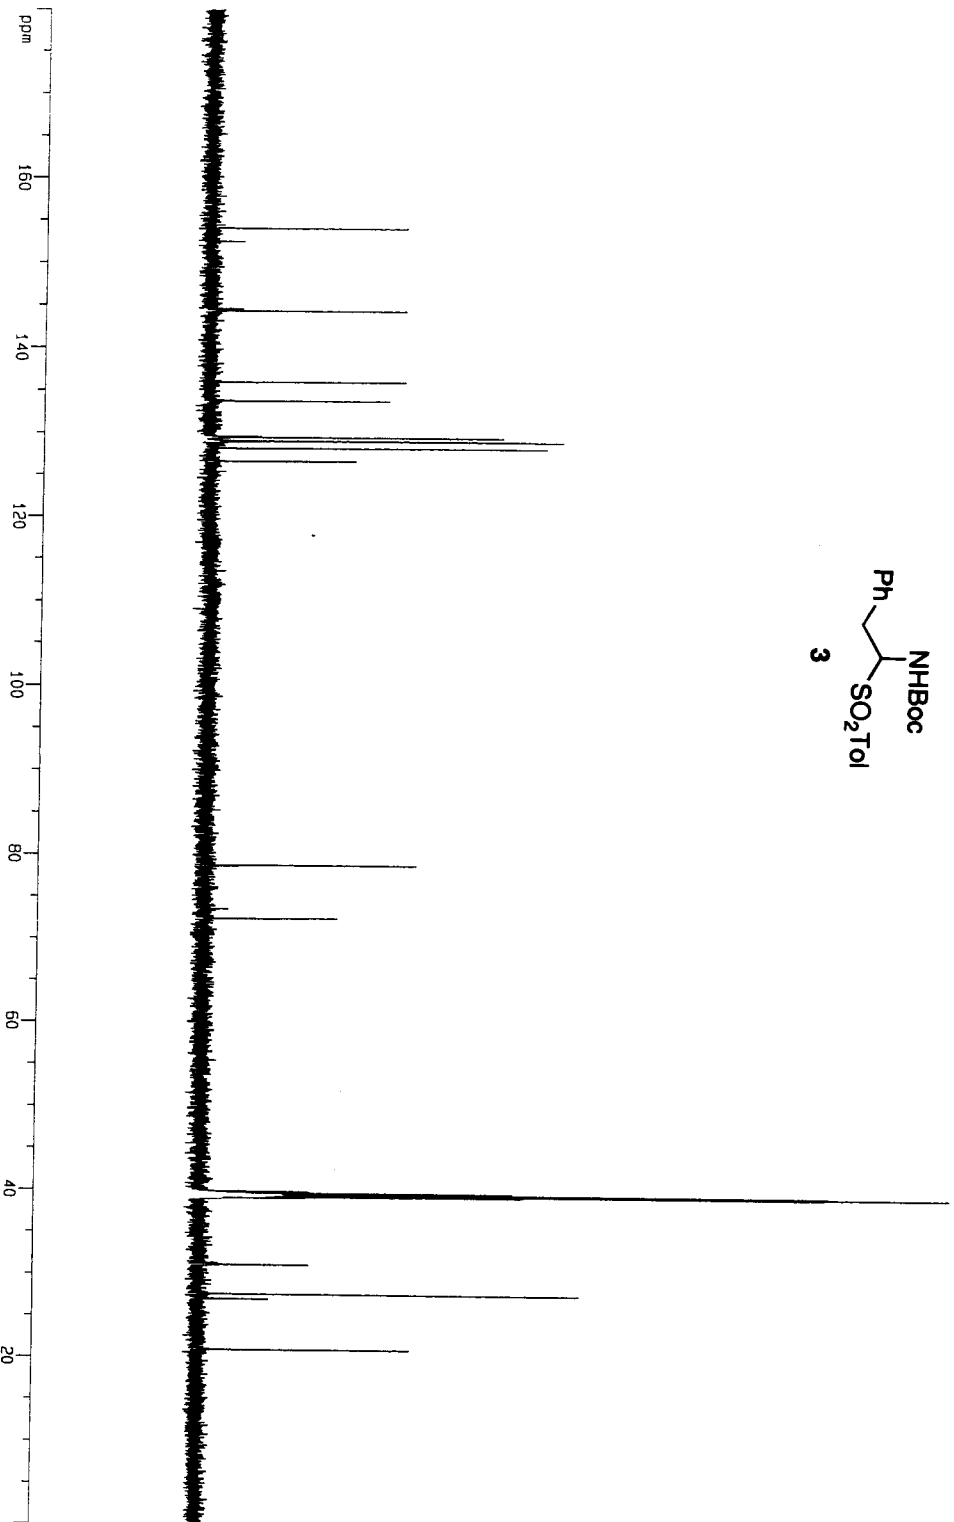

F2 - Acquisition Parameters  
 Date\_ 20050303  
 Time 21.21  
 INSTRUM spect  
 PROBHD 5 mm TBI 1H/  
 PULPROG c13winoe  
 TD 65536  
 SOLVENT CDCl3  
 NS 64  
 DS 2  
 SMH 37878.789 HZ  
 FIDRES 0.577984 HZ  
 AQ 0.8651252 sec  
 RG 32768  
 DW 13.200 usec  
 DE 6.00 usec  
 TE 290.0 K  
 D1 8.00000000 sec  
 D3 0.00100000 sec

==== CHANNEL f1 =====  
 NUC1 13C  
 P1 13.00 usec  
 PL1 0.00 dB  
 SF01 151.0953827 MHz

==== CHANNEL f2 =====  
 CPDPRG2 wa1t216  
 NUC2 1H  
 PCPD2 100.00 usec  
 PL2 0.00 dB  
 PL12 12.00 dB  
 SF02 600.8336050 MHz

F2 - Processing parameters  
 SI 65536  
 SF 151.0789986 MHz  
 MDW EM  
 SSB 0  
 LB 1.00 HZ  
 GB 0  
 PC 1.00

1D NMR plot parameters  
 CX 20.00 cm  
 F1P 180.000 ppm  
 F1 27194.20 HZ  
 F2P 0.000 ppm  
 F2 0.00 HZ  
 PPMCM 9.00000 ppm/cm  
 HZCM 1359.71008 HZ/cm

xjb-5-183-600, cdcl3, 298K, 600MHZ

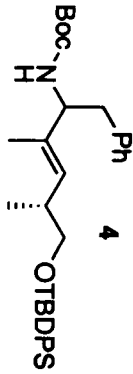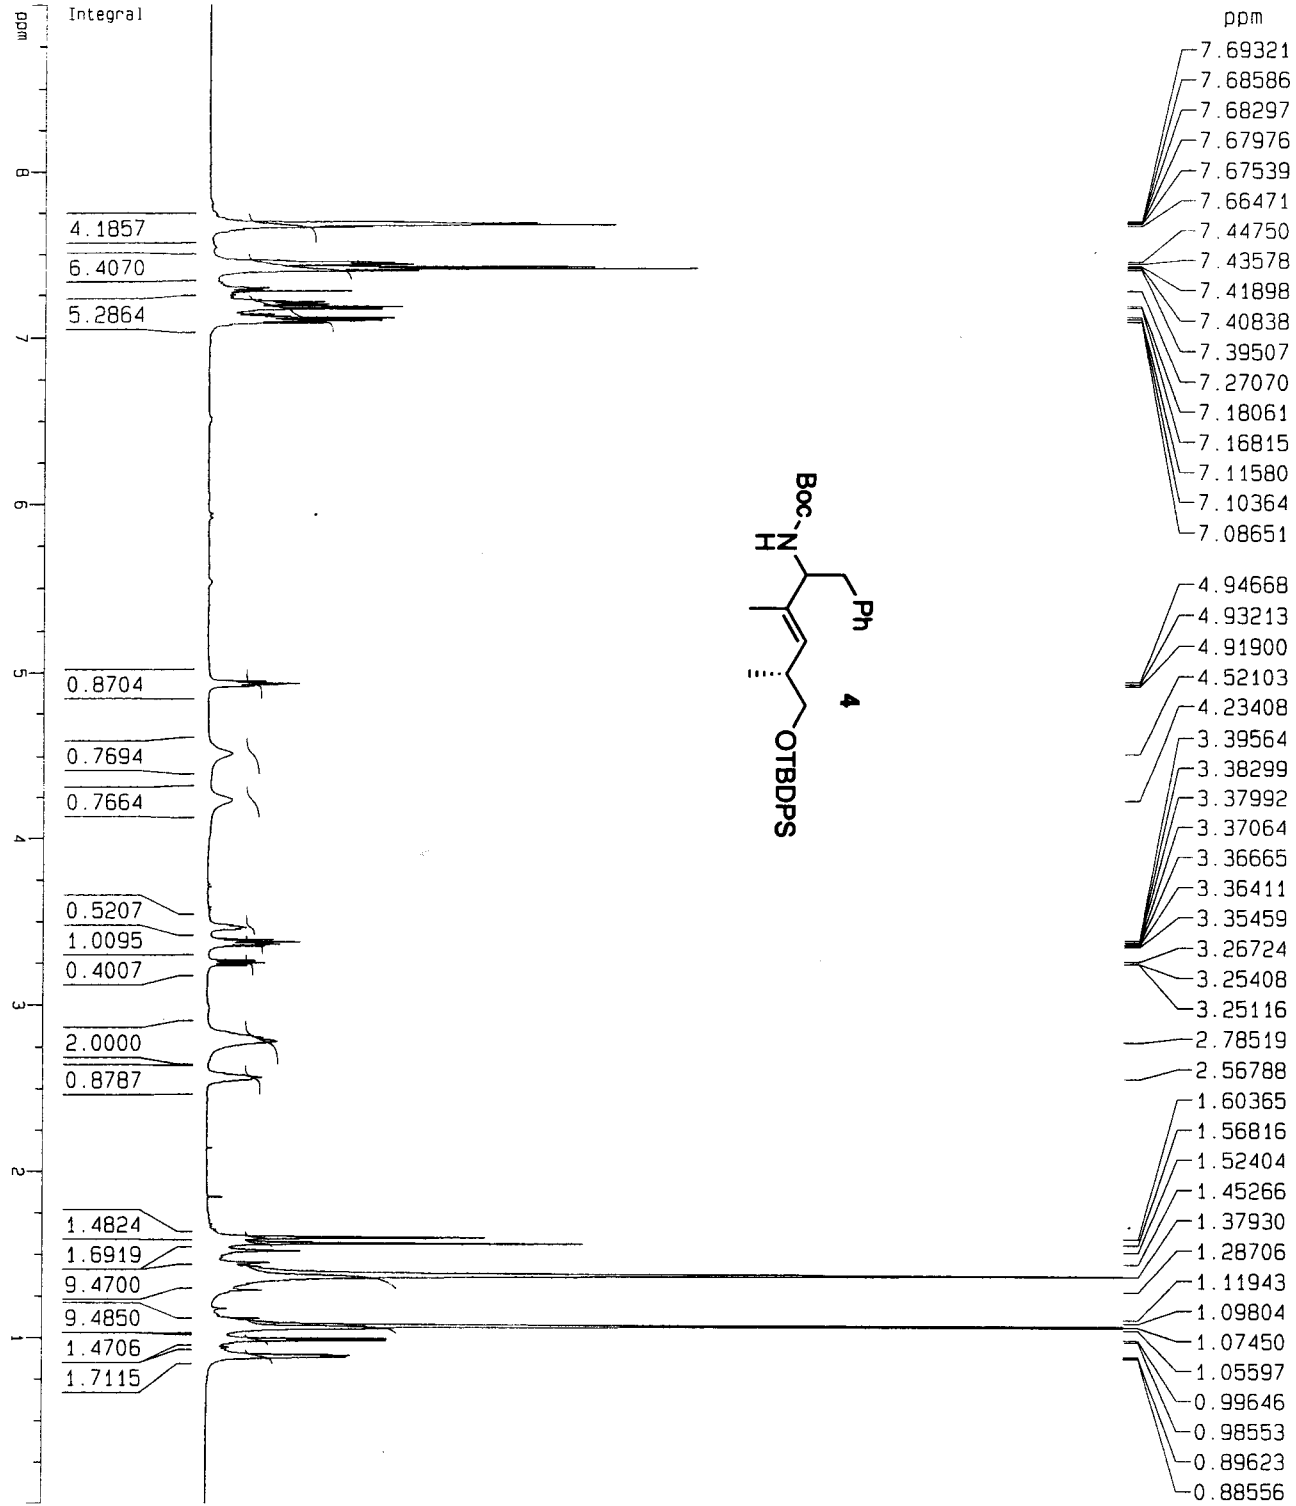

Current Data Parameters  
 NAME xjb-5-183-600  
 EXPNO 2  
 PROCNO 1

F2 - Acquisition Parameters  
 Date\_ 20050303  
 Time 18.00  
 INSTRUM spect  
 PROBD 5 mm TBI 1H/  
 PULPROG zg  
 TD 65536  
 SOLVENT CDCl2  
 NS 20  
 DS 0  
 SWH 8992.806 Hz  
 FIDRES 0.137219 Hz  
 AQ 3.6438515 sec  
 RG 10  
 DW 55.600 usec  
 DE 6.00 usec  
 TE 290.0 K  
 D1 3.00000000 sec

==== CHANNEL f1 ====  
 NUC1 1H  
 P1 9.00 usec  
 PL1 0.00 dB  
 SF01 600.8336050 MHz

F2 - Processing Parameters  
 SI 65536  
 SF 600.8300261 MHz  
 WDW EM  
 SSB 0  
 LB 0.10 Hz  
 GB 0  
 PC 1.00

1D NMR plot parameters  
 CX 20.00 cm  
 F1P 9.000 ppr  
 F1 5407.47 Hz  
 F2P 0.000 ppr  
 F2 0.00 Hz  
 PPMCM 0.45000 ppr  
 HZCM 270.37350 Hz,

xjb-5-183-500, cdc13, rt, 125 MHZ C13 NMR

Current Data Parameters  
 NAME xjb-5-183-500  
 EXPNO 13  
 PROCNO 1

F2 - Acquisition Parameters

Date\_ 500000  
 Time 19.37  
 INSTRUM spect  
 PROBHD 5 mm TXI 13C  
 PULPROG c13knoae  
 TD 32768  
 SOLVENT CDC13  
 NS 1035  
 DS 0  
 SWH 32679.738 Hz  
 FIDRES 0.997306 Hz  
 AQ 0.5014004 sec  
 RG 32768  
 DM 15.300 usec  
 DE 6.00 usec  
 TE 290.0 K  
 D3 0.00100000 sec  
 PL12 6.00 dB  
 D1 8.00000000 sec  
 CPDPRG2 waltz16  
 PCPD2 100.00 usec  
 SF02 500.1330008 MHz  
 NUC2 1H  
 PL2 120.00 dB  
 P1 21.60 usec  
 DE 6.00 usec  
 SF01 125.7715724 MHz  
 NUC1 13C  
 PL1 0.00 dB

F2 - Processing Parameters

SI 8192  
 SF 125.7578000 MHz  
 MDW EM  
 SSB 0  
 LB 4.00 Hz  
 GB 0  
 PC 1.00

1D NMR plot parameters

CX 20.00 cm  
 F1P 180.000 ppm  
 F1 22636.40 Hz  
 F2P 0.000 ppm  
 F2 0.000 Hz  
 PPMCM 9.00000 ppm/cm  
 HZCM 1131.82019 Hz/cm

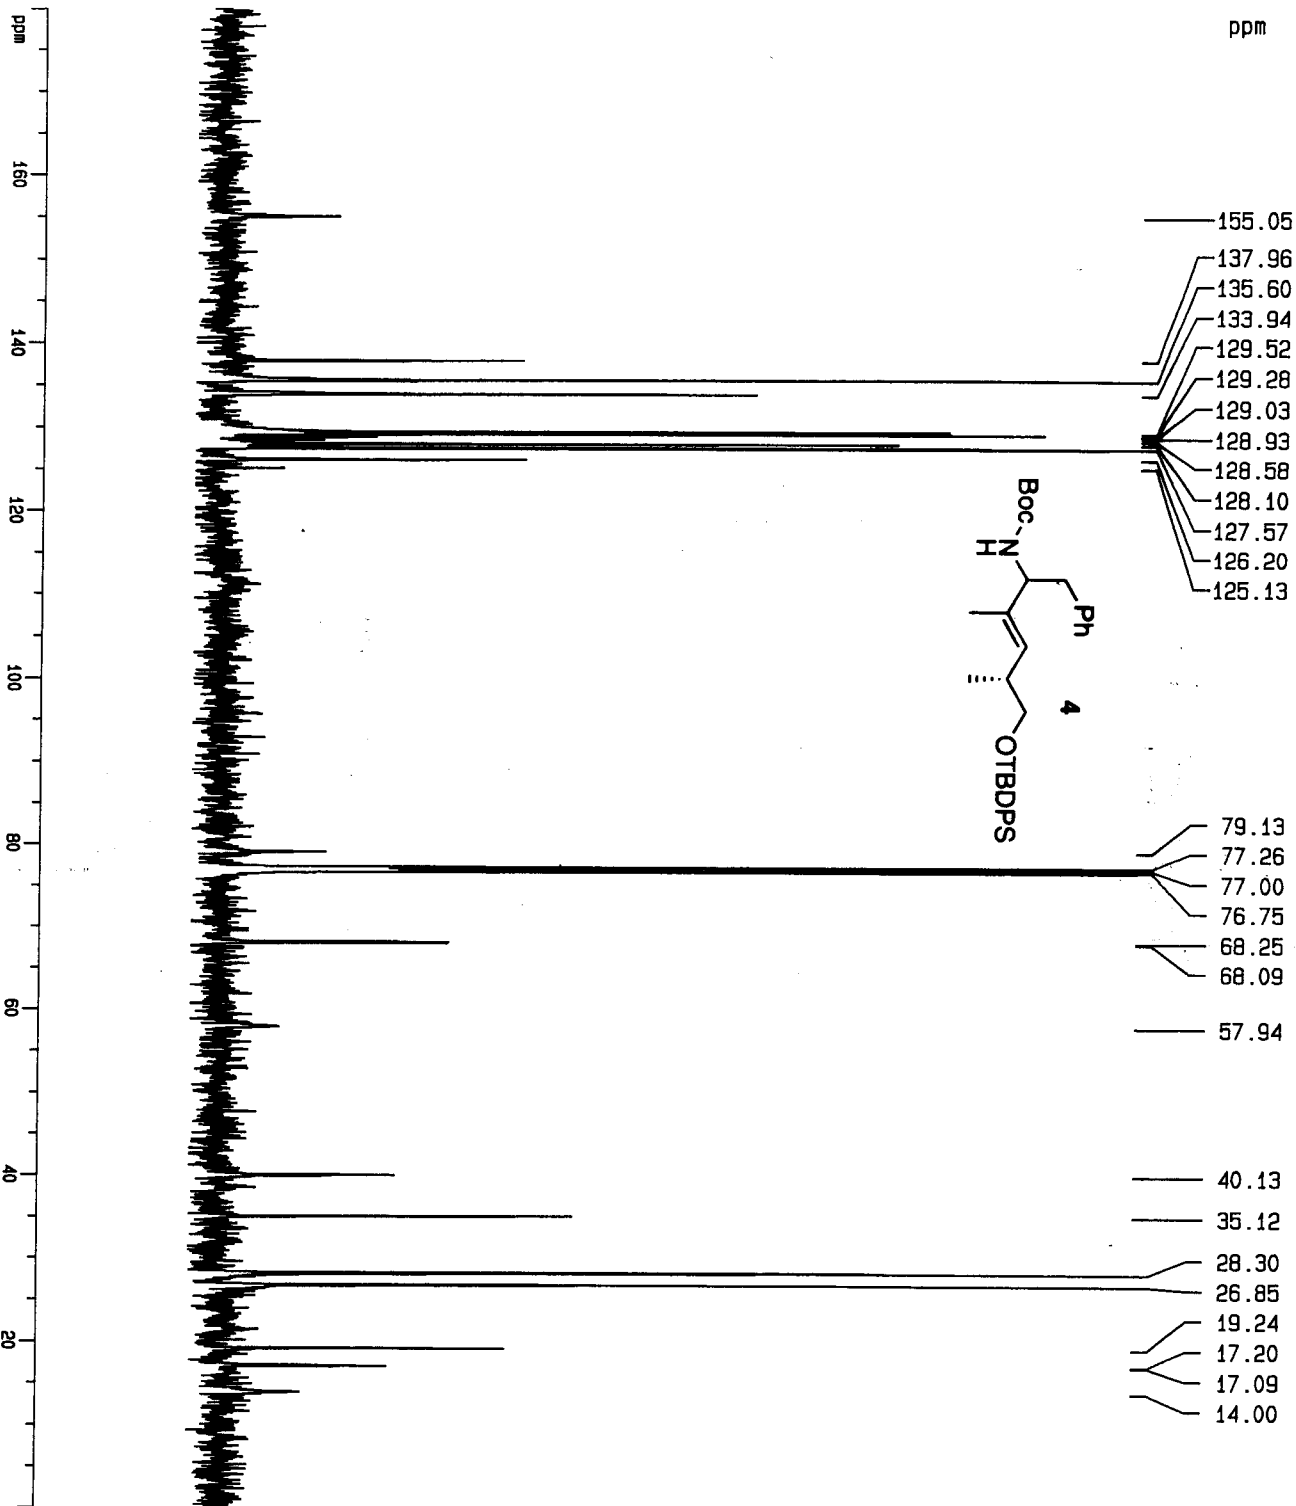

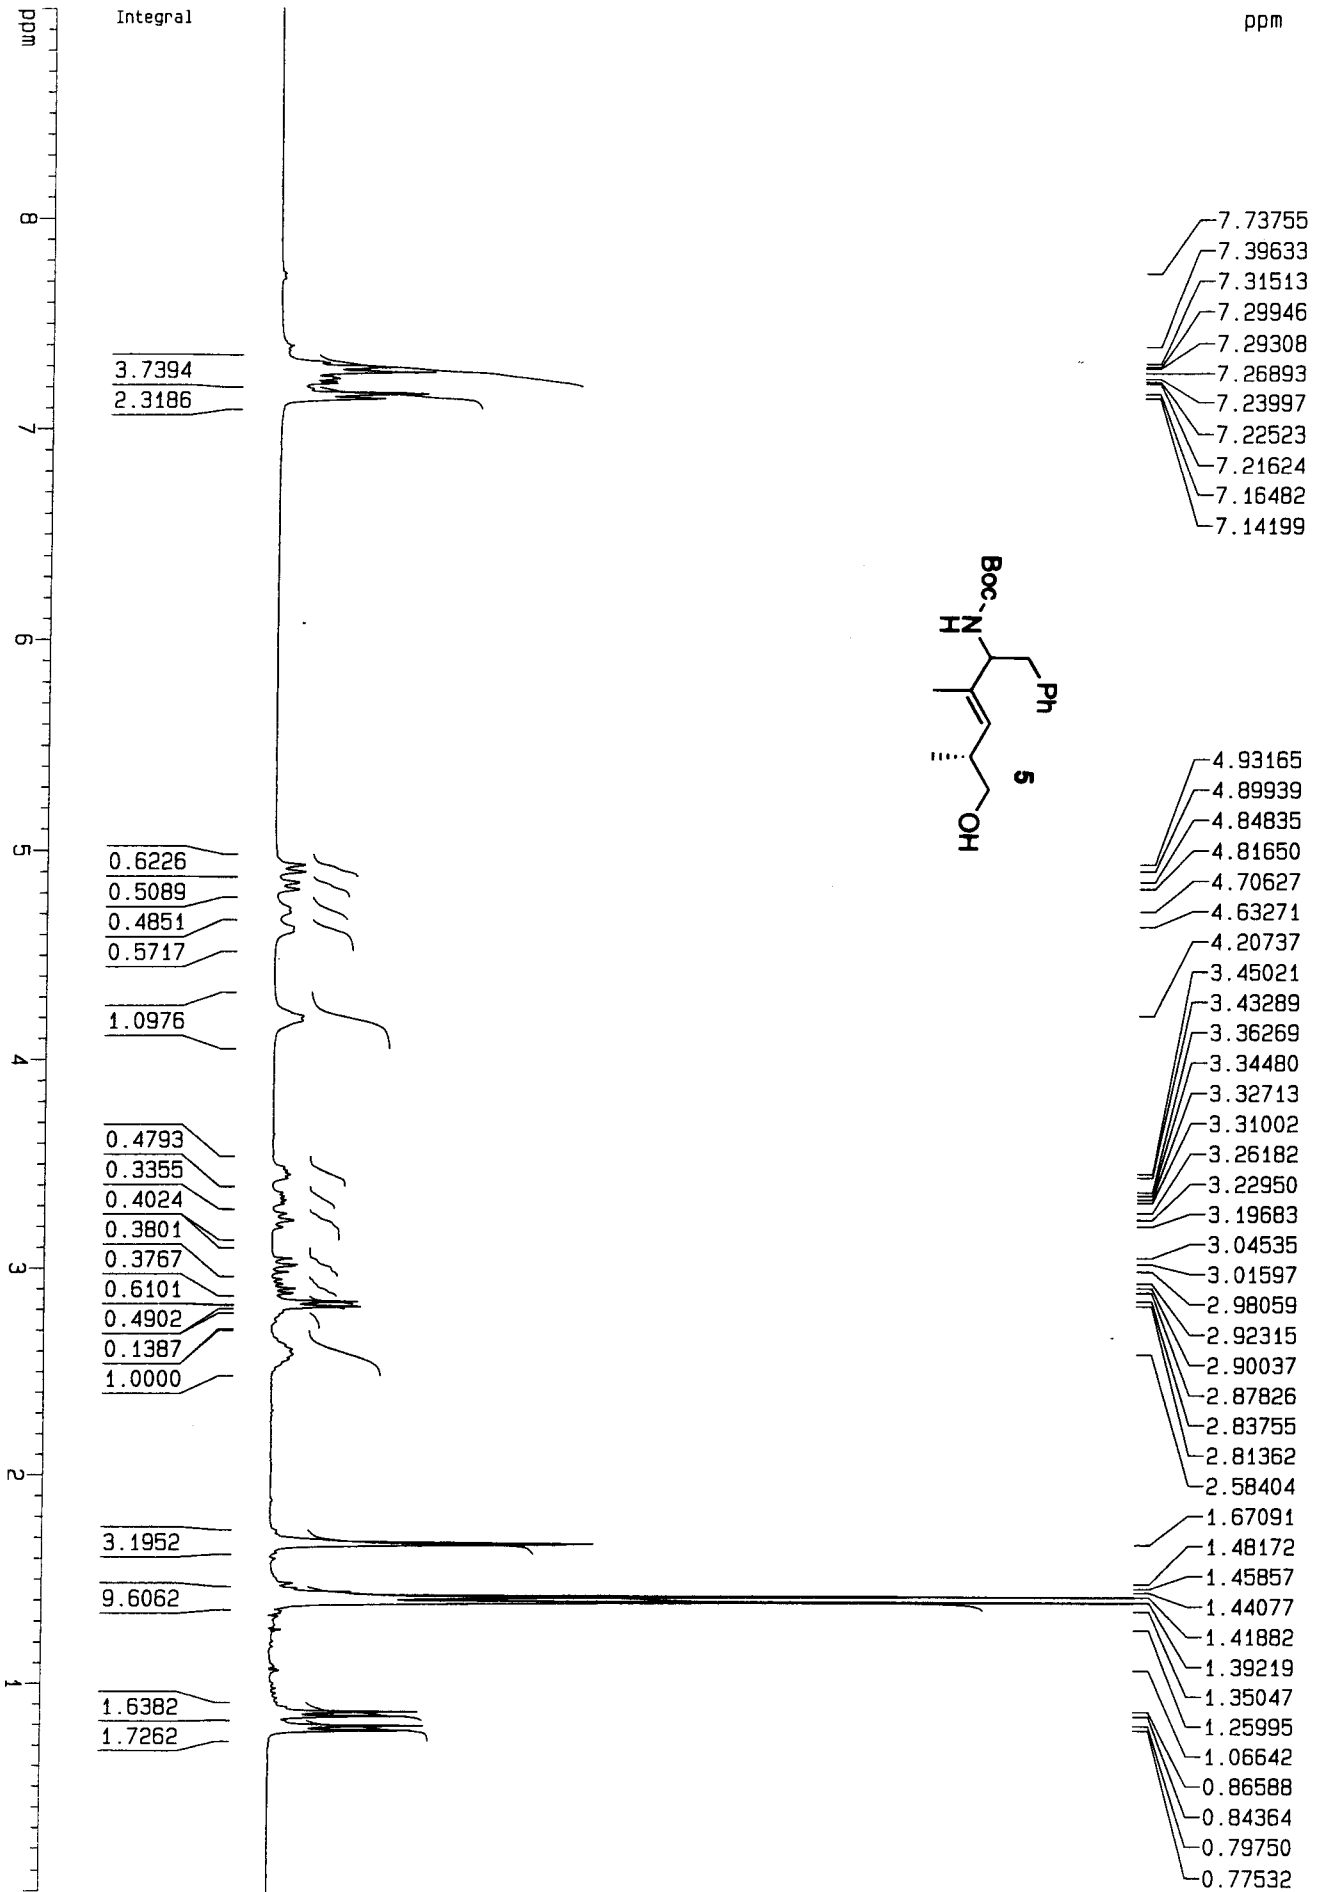

xj-b-5-168, cdcl3, rt, 300, 300MHZ

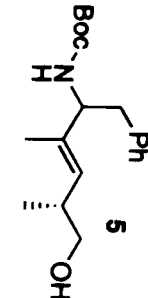

✓



XJB-5-168, cdcl3, rt, 300MHZ, 300

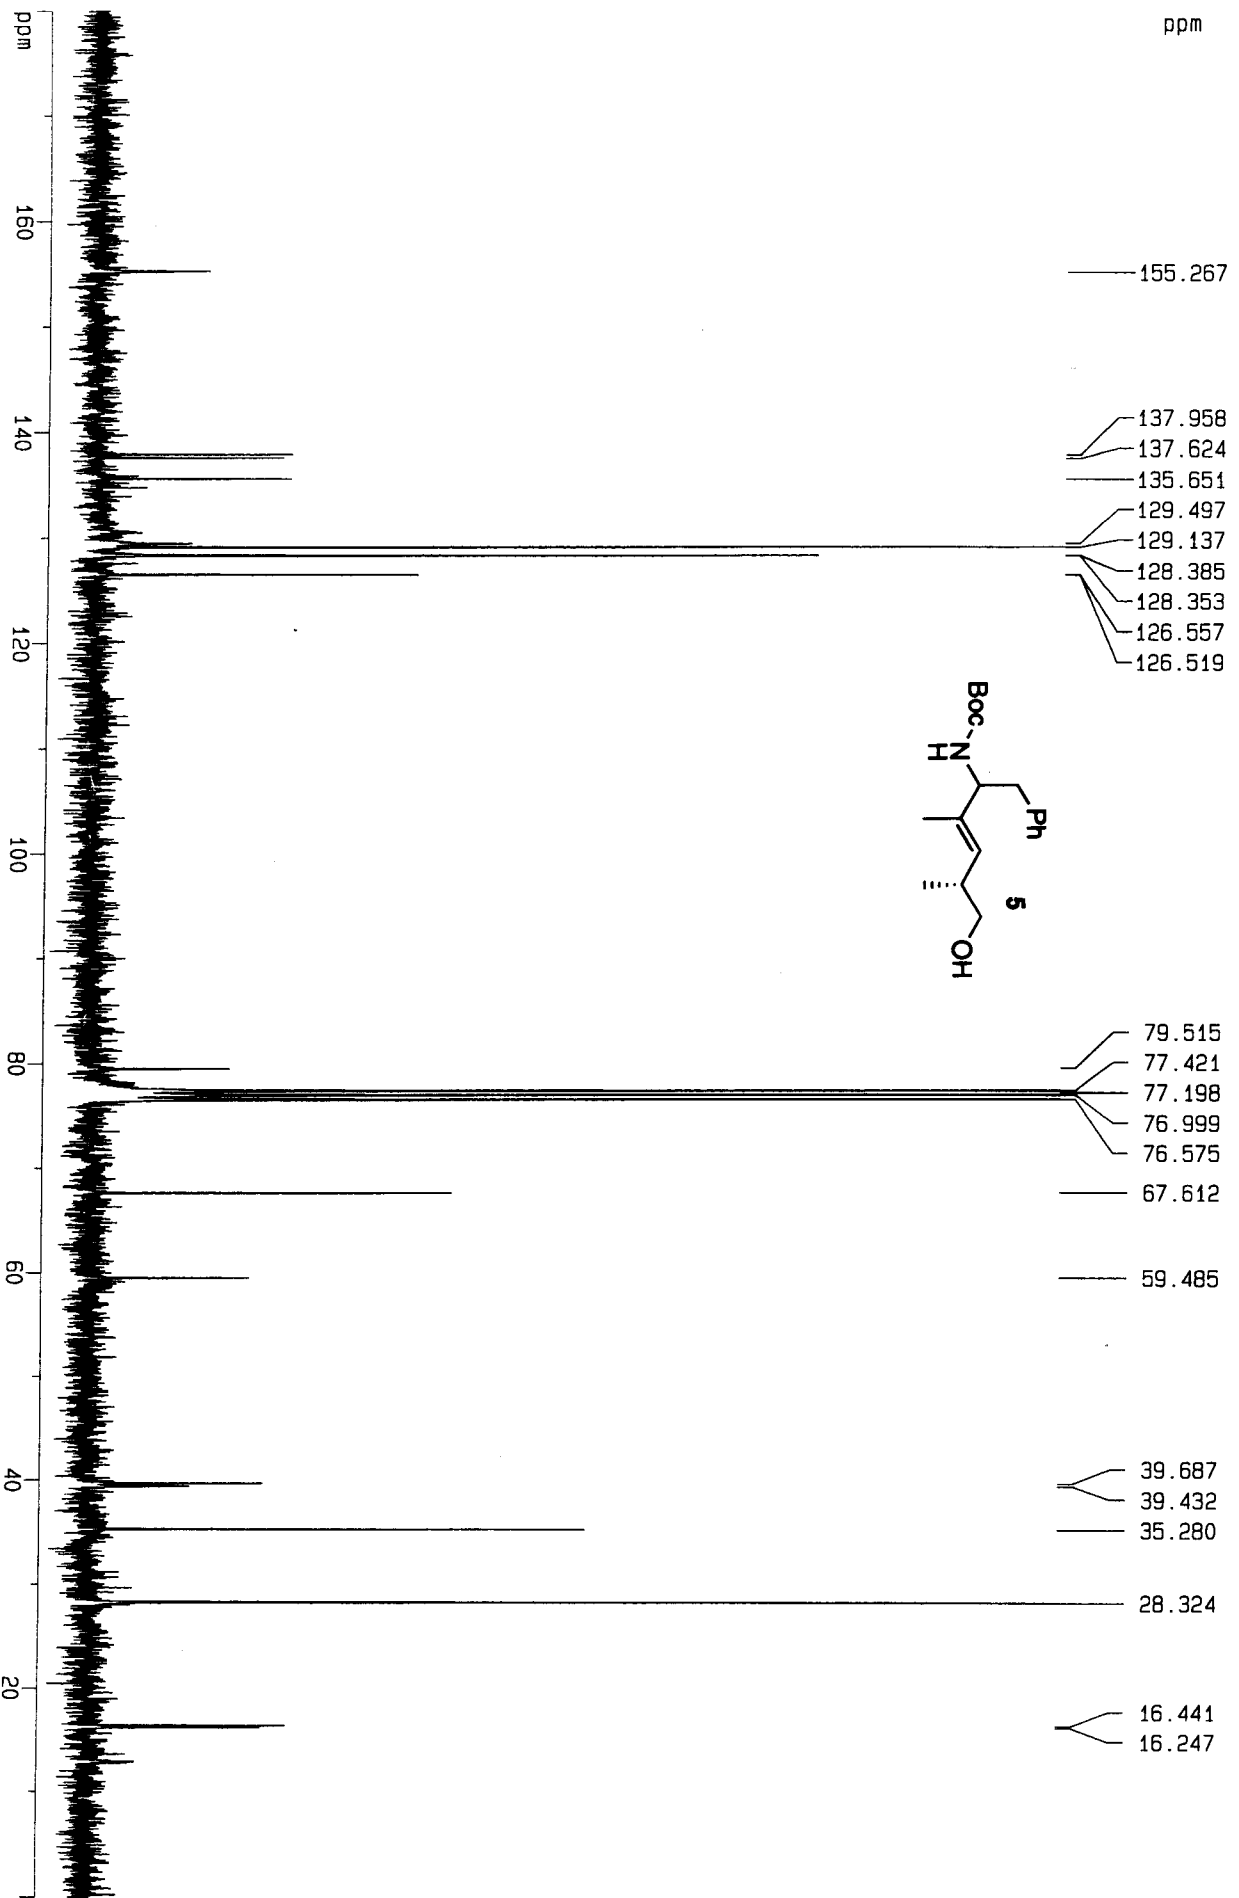

xjb-5-247-1-600, cdcl3, 298K, 600MHZ

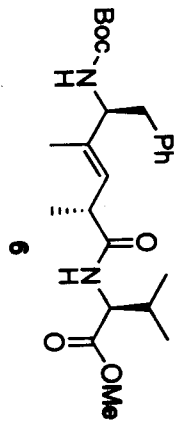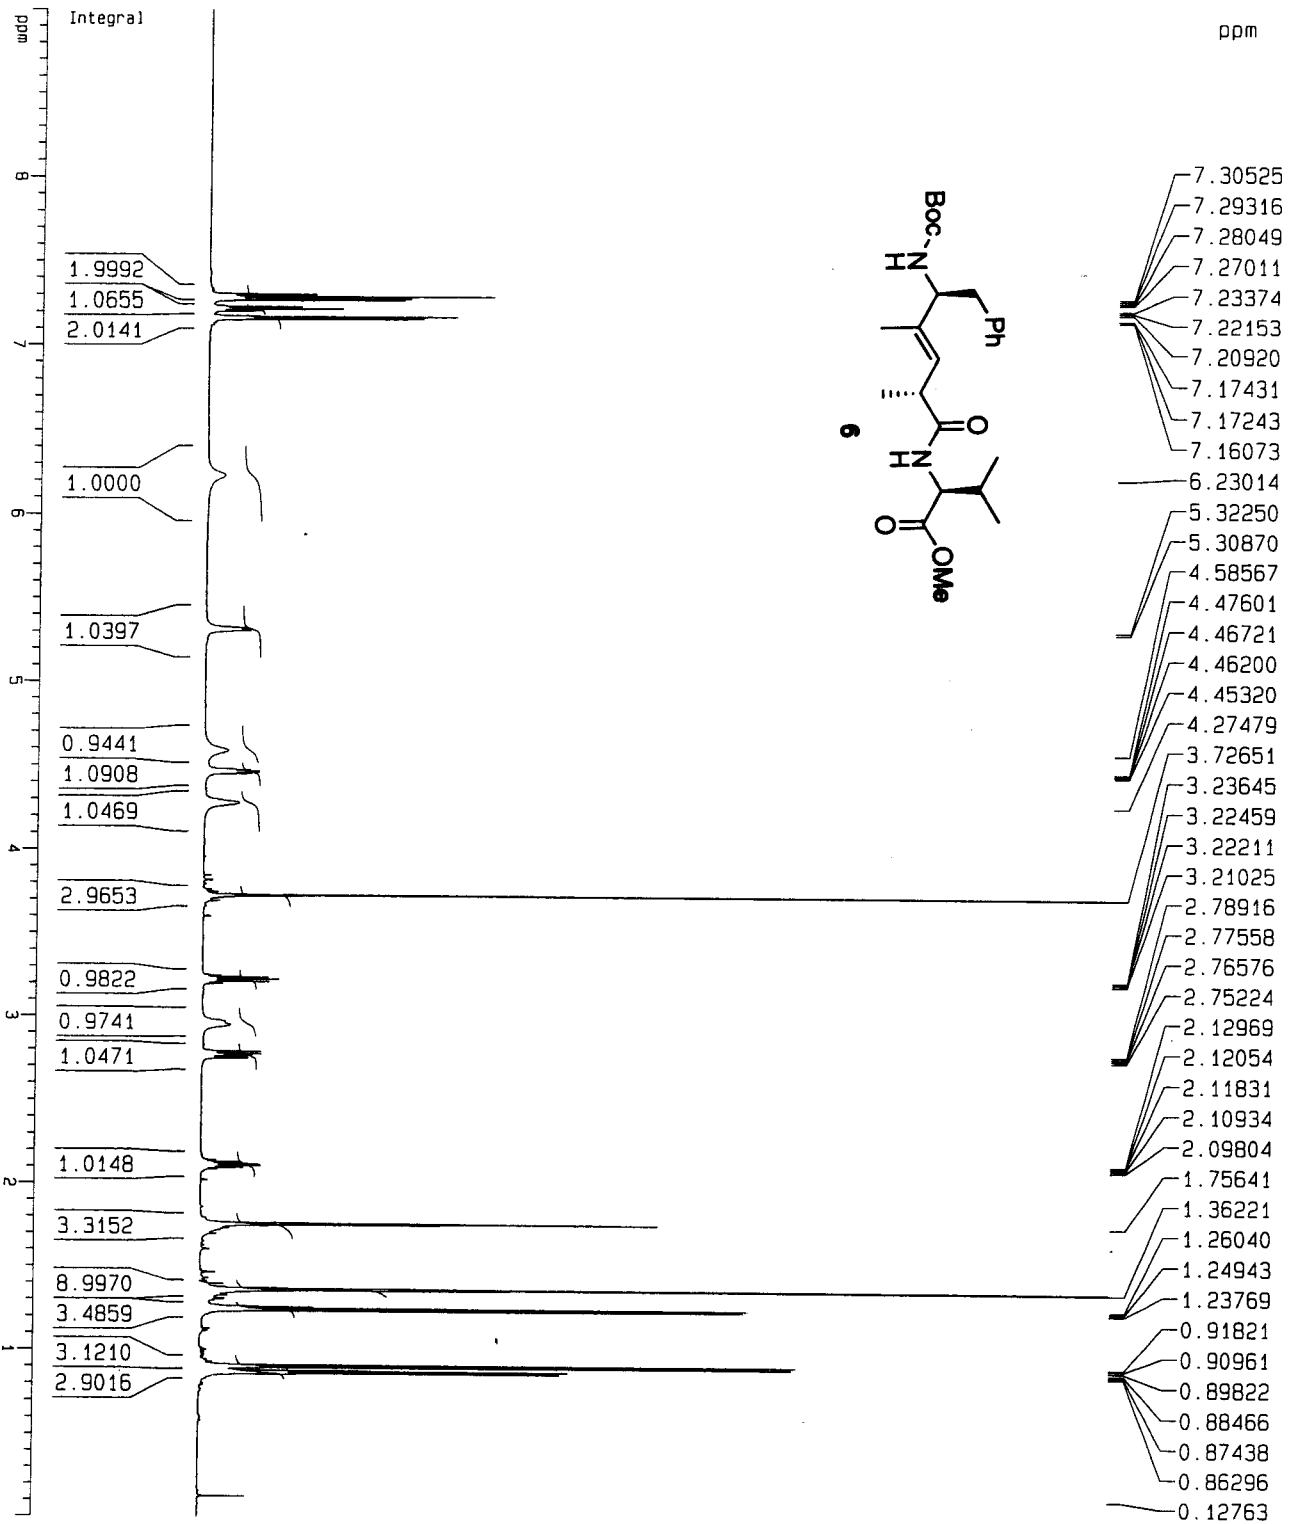

Current Data Parameters  
 NAME xjb-5-247-1-60  
 EXPNO 1  
 PROCNO 1

F2 - Acquisition Parameters  
 Date\_ 20050508  
 Time 13.28

INSTRUM spect  
 PROBD 5 mm TBI 1H/  
 PULPROG zg

TD 65536  
 SOLVENT CDCl3

NS 40  
 DS 0

SWH 8992.806 Hz  
 FIDRES 0.137219 Hz

AQ 3.6438515 sec  
 RG 2

DW 55.600 usec  
 DE 6.00 usec

TE 290.0 K  
 D1 6.00000000 sec

==== CHANNEL f1 ===  
 NUC1 1H  
 P1 9.00 usec  
 PL1 0.00 dB  
 SF01 600.8336050 MHz

F2 - Processing parameters  
 SI 65536  
 SF 600.8300264 MHz

WDW EM  
 SSB 0  
 LB 0.10 Hz  
 GB 0  
 PC 1.00

1D NMR plot parameters  
 CX 20.00 cm  
 F1P 9.000 ppr  
 F1 5407.47 Hz  
 F2P 0.000 ppr  
 F2 0.00 Hz  
 PPMGM 0.45000 ppr  
 HZCM 270.37350 Hz

xjb-5-247-1-600, cdc13, 298K, 151MHz C13

Current Data Parameters  
 NAME xjb-5-247-1-60  
 EXPNO 13  
 PROCNO 1

F2 - Acquisition Parameters

Date\_ 20050507  
 Time 21.15  
 INSTRUM spect  
 PROBHD 5 mm TBI 1H/  
 PULPROG c13winoe  
 TD 65536  
 SOLVENT CDCl3  
 NS 5343  
 DS 0  
 SMH 37878.789 Hz  
 FIDRES 0.577984 Hz  
 AQ 0.8651252 sec  
 RG 32768  
 DW 13.200 usec  
 DE 6.00 usec  
 TE 290.0 K  
 D1 10.00000000 sec  
 D3 0.00100000 sec

==== CHANNEL f1 =====  
 NUC1 13C  
 P1 13.50 usec  
 PL1 0.00 dB  
 SF01 151.0953827 MHz

==== CHANNEL f2 =====  
 CPDPRG2 waitz16  
 NUC2 1H  
 PCPD2 100.00 usec  
 PL2 0.00 dB  
 PL12 12.00 dB  
 SF02 600.8336050 MHz

F2 - Processing Parameters  
 SI 65536  
 SF 151.0788333 MHz  
 WDM EM  
 SSB 0  
 LB 1.00 Hz  
 GB 0  
 PC 1.00

1D NMR plot parameters

CX 20.00 cm  
 F1P 200.000 ppm  
 F1 30215.77 Hz  
 F2P 0.000 ppm  
 F2 0.00 Hz  
 PPMCM 10.00000 ppm/cm  
 HZCM 1510.78833 Hz/cm

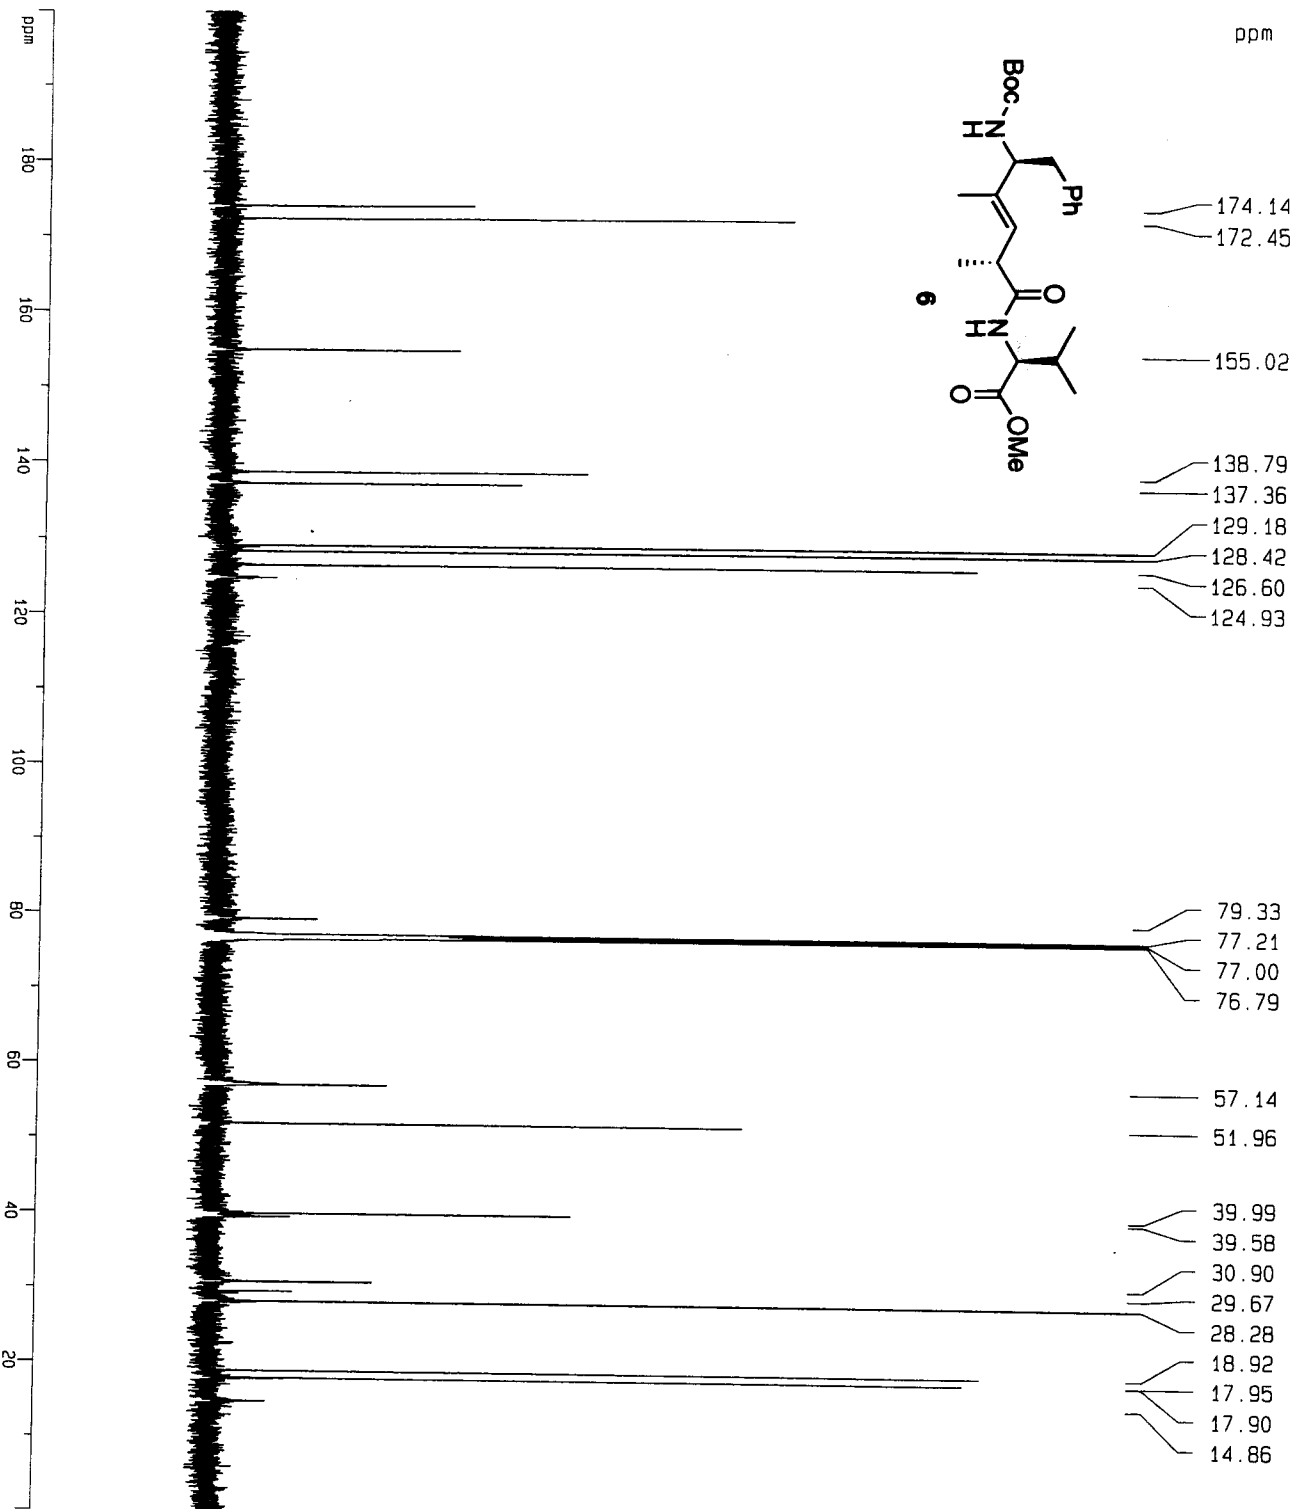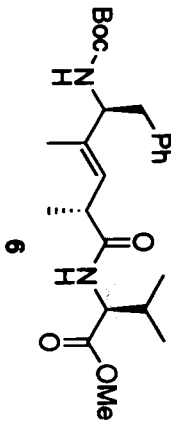

xjb-5-247-2-600, cdcl3, 298K, 600MHZ

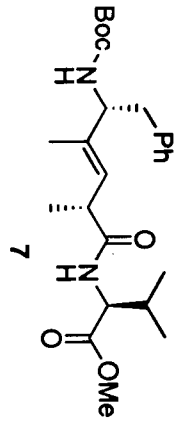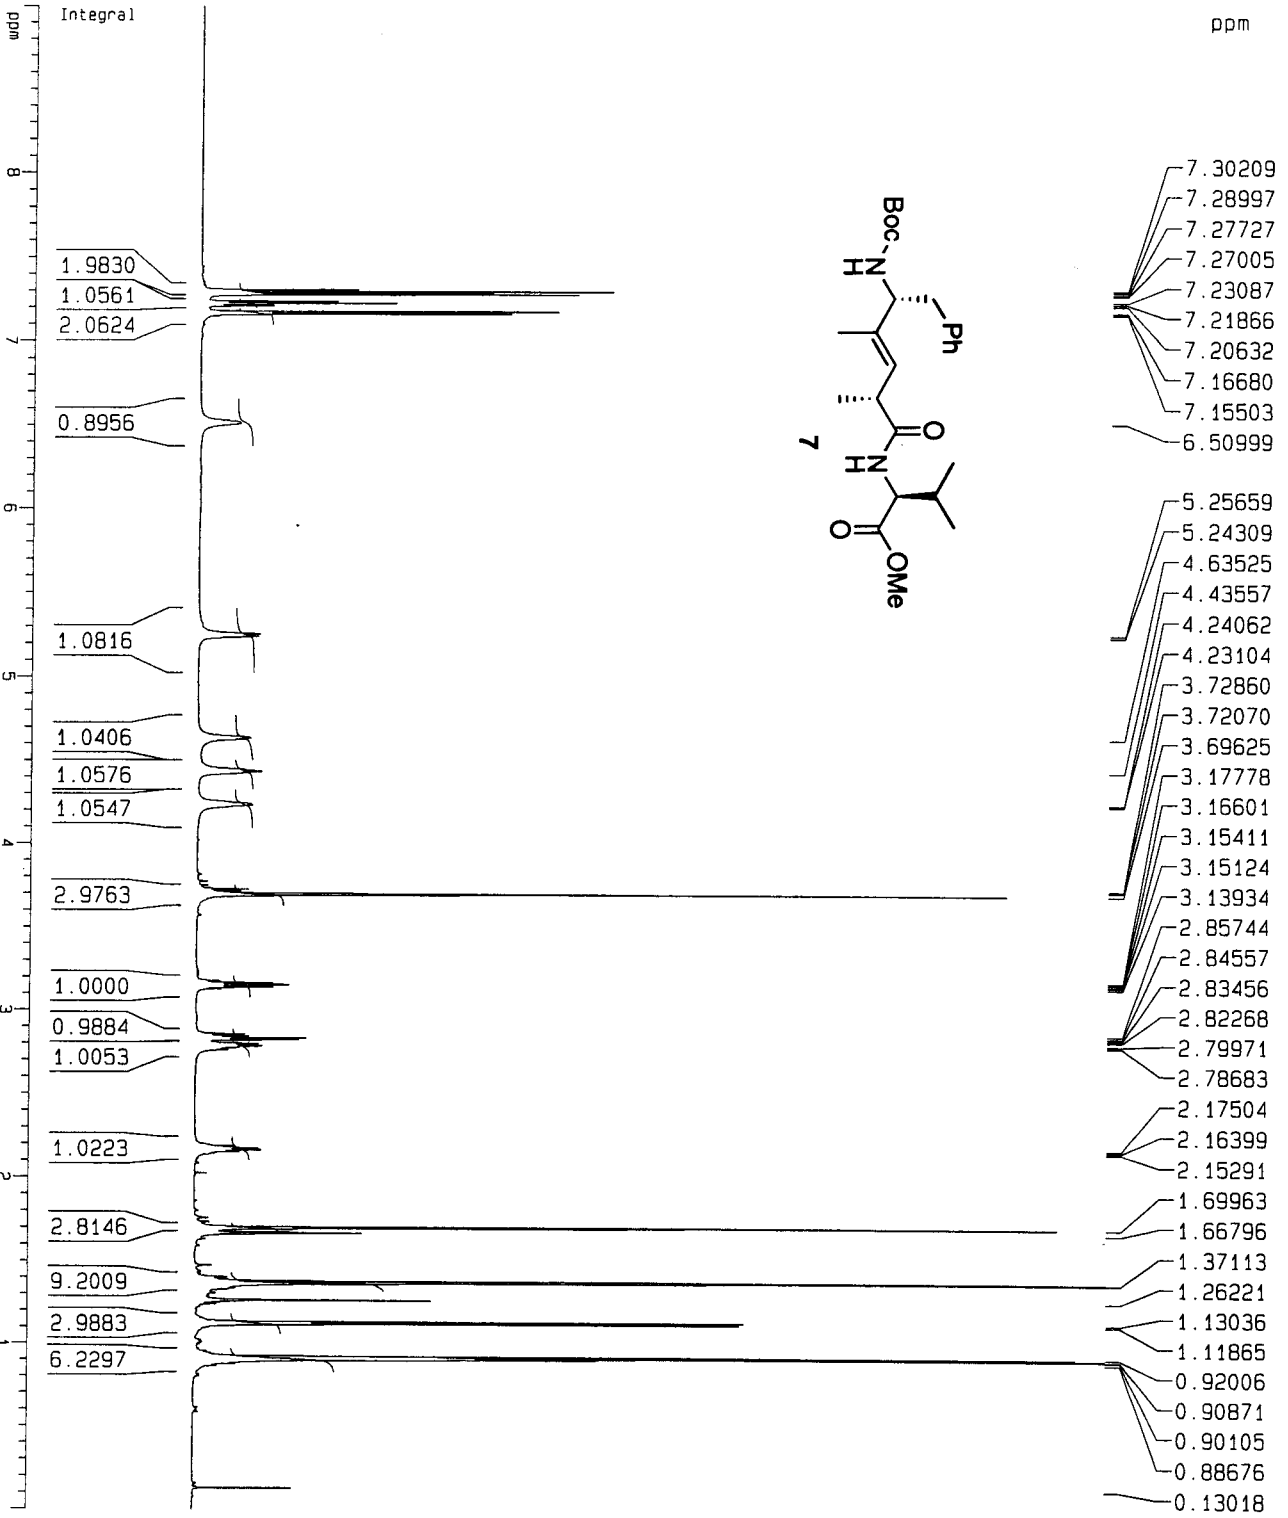

Current Data Parameters  
 NAME xjb-5-247-2-60  
 EXPNO 1  
 PROCNO 1

F2 - Acquisition Parameters:  
 Date\_ 20050507  
 Time 20.56

INSTRUM spect  
 PROBHD 5 mm TBI 1H/  
 PULPROG zg  
 TD 65536  
 SOLVENT CDCl2  
 NS 20  
 DS 0  
 SMH 8992.806 Hz  
 FIDRES 0.137219 Hz  
 AQ 3.6438515 sec  
 RG 10  
 DW 55.600 use  
 DE 6.00 use  
 TE 290.0 K  
 D1 6.00000000 sec

==== CHANNEL f1 ===  
 NUC1 1H  
 P1 9.00 use  
 PL1 0.00 dB  
 SF01 600.8336050 MHz

F2 - Processing parameters  
 SI 65536  
 SF 600.8300265 MHz  
 WDW EM  
 SSB 0  
 LB 0.10 Hz  
 GB 0  
 PC 1.00

1D NMR plot parameters  
 CX 20.00 cm  
 F1P 9.000 ppr  
 F1 5407.47 Hz  
 F2P 0.000 ppr  
 F2 0.00 Hz  
 PPMCM 0.45000 ppr  
 HZCM 270.37350 Hz

xjb-5-247-2-66, cdc13, 298K, 151MHz C13

Current Data Parameters  
 NAME xjb-5-247-2-60  
 EXPNO 13  
 PROCNO 1

F2 - Acquisition Parameters

Date\_ 20050507  
 Time 13.50  
 INSTRUM spect  
 PROBHD 5 mm TBI 1H/  
 PULPROG c13wznoe  
 TD 65536  
 SOLVENT CDC13  
 NS 2938  
 DS 0  
 SMH 37878.789 Hz  
 FIDRES 0.577984 Hz  
 AQ 0.8651252 sec  
 RG 32768  
 DW 13.200 usec  
 DE 6.00 usec  
 TE 290.0 K  
 D1 8.00000000 sec  
 D3 0.00100000 sec

===== CHANNEL f1 =====  
 NUC1 13C  
 P1 13.50 usec  
 PL1 0.00 dB  
 SF01 151.0953827 MHz

===== CHANNEL f2 =====  
 CPDPRG2 waltz16  
 NUC2 1H  
 PCPD2 100.00 usec  
 PL2 0.00 dB  
 PL12 12.00 dB  
 SF02 600.8336050 MHz

F2 - Processing parameters

SI 65536  
 SF 151.0788321 MHz  
 MDW EM  
 SSB 0  
 LB 1.00 Hz  
 GB 0  
 PC 1.00

1D NMR plot parameters

CX 20.00 cm  
 F1P 200.000 ppm  
 F1 30215.77 Hz  
 F2P 0.000 ppm  
 F2 0.00 Hz  
 PPMCM 10.00000 ppm/cm  
 HZCM 1510.78833 Hz/cm

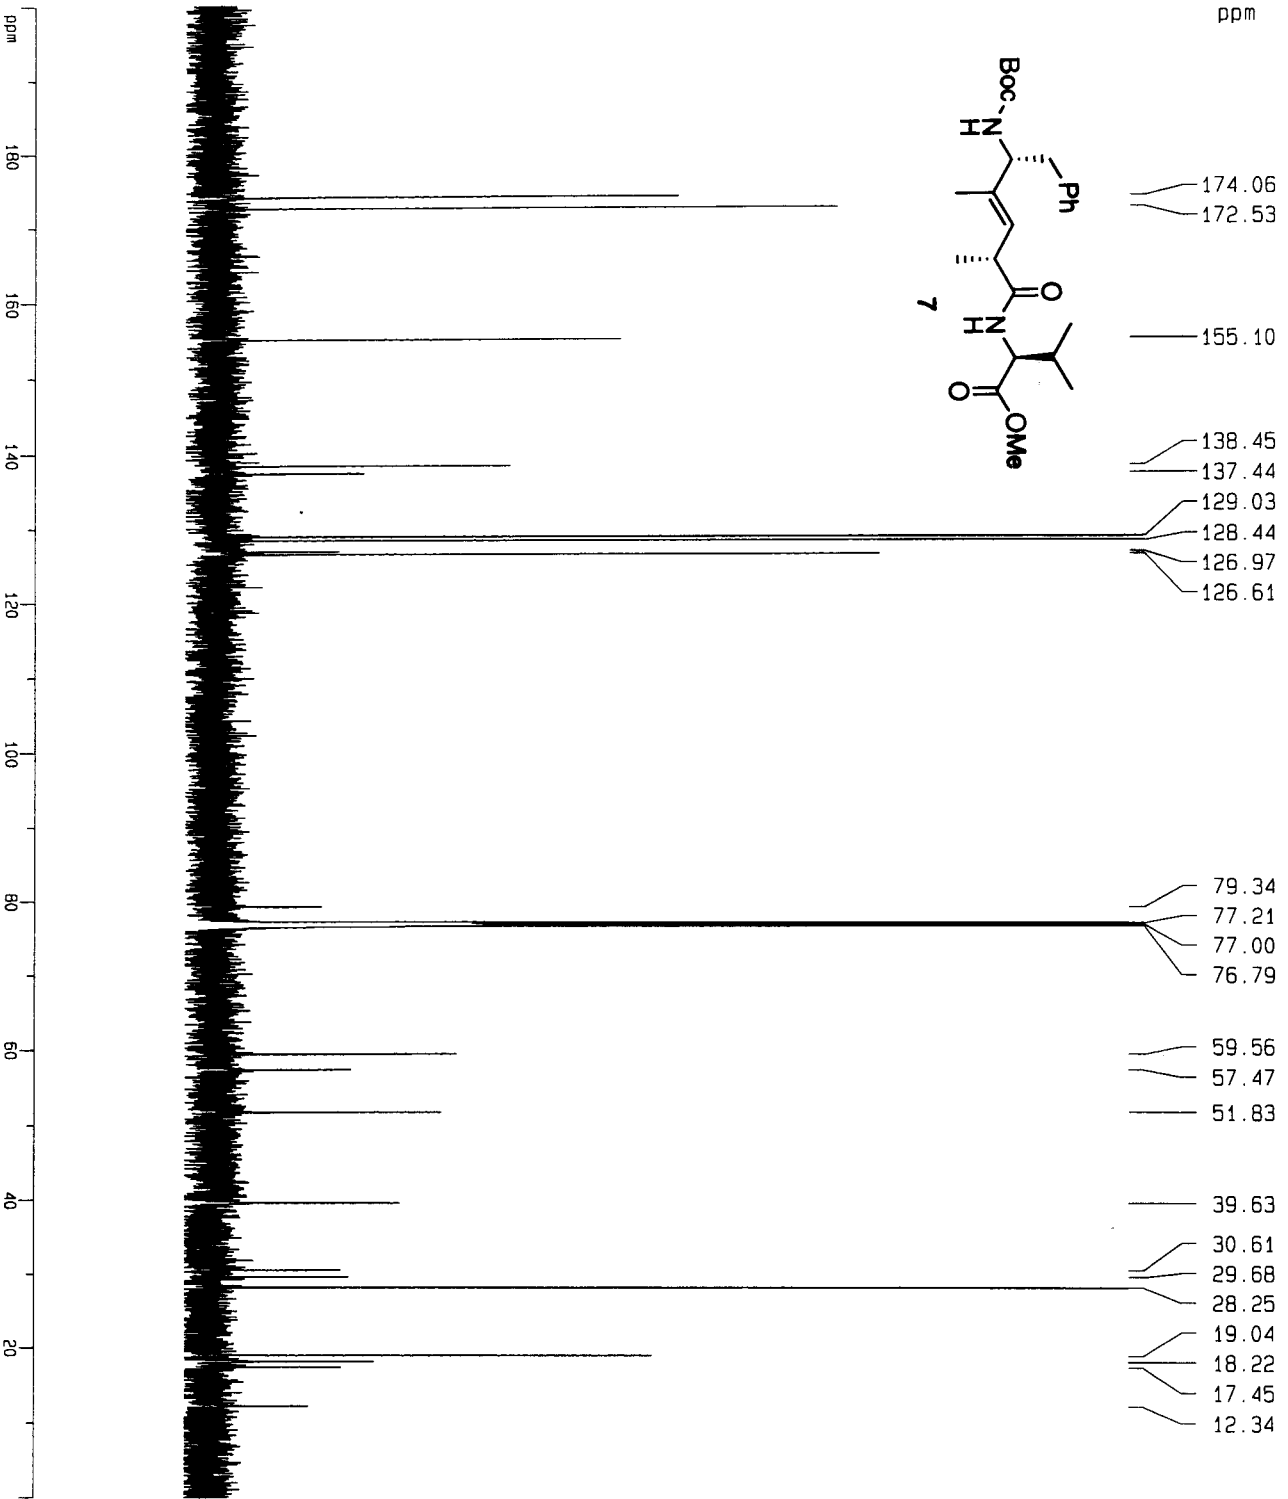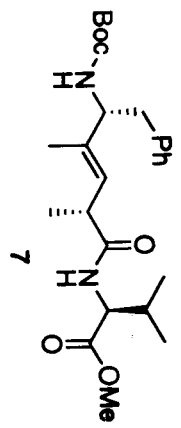



xjb-5-272, cdCl3, rt, 125MHz, C13 cdh

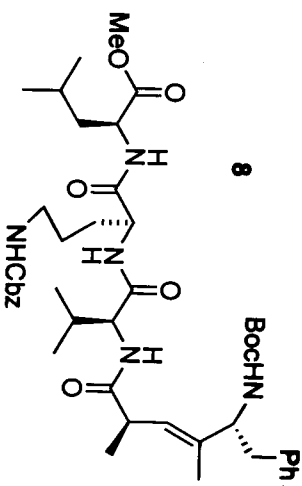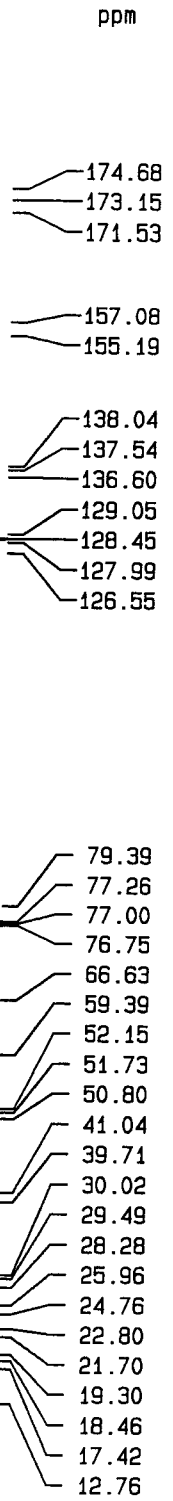

Current Data Parameters  
 NAME xjb-5-272-500  
 EXPNO 14  
 PROCNO 1

F2 - Acquisition Parameters  
 Date\_ 500000  
 Time 15.33  
 INSTRUM spect  
 PROBHD 5 mm TXI 13C  
 PULPROG c13winoe  
 TD 32768  
 SOLVENT CDCl3  
 NS 2935  
 DS 0  
 SWH 32679.738 Hz  
 FIDRES 0.997306 Hz  
 AQ 0.5014004 sec  
 RG 32768  
 DW 15.300 usec  
 DE 6.00 usec  
 TE 290.0 K  
 D3 0.00100000 sec  
 PL12 6.00 dB  
 D1 8.00000000 sec  
 CPDPRG2 waltz16  
 PCPD2 100.00 usec  
 SF02 500.1330008 MHz  
 NUC2 1H  
 PL2 120.00 dB  
 P1 21.60 usec  
 DE 6.00 usec  
 SF01 125.7715724 MHz  
 NUC1 13C  
 PL1 0.00 dB

F2 - Processing parameters  
 SI 8192  
 SF 125.7577961 MHz  
 WDW EM  
 SSB 0  
 LB 4.00 Hz  
 GB 0  
 PC 1.00

1D NMR plot parameters  
 CX 20.00 cm  
 F1P 200.000 ppm  
 F1 25151.56 Hz  
 F2P 0.000 ppm  
 F2 0.00 Hz  
 PPM/CM 10.00000 ppm/cm  
 HZ/CM 1257.57800 Hz/cm

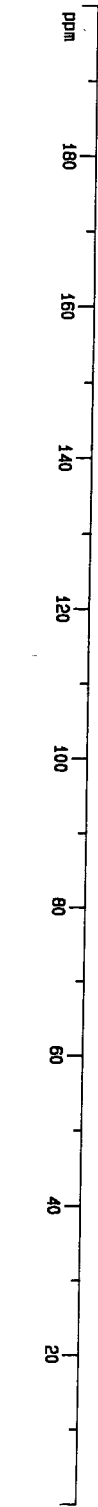

xjb-7-31-600, DMSO-d6, 600MHZ, 298K

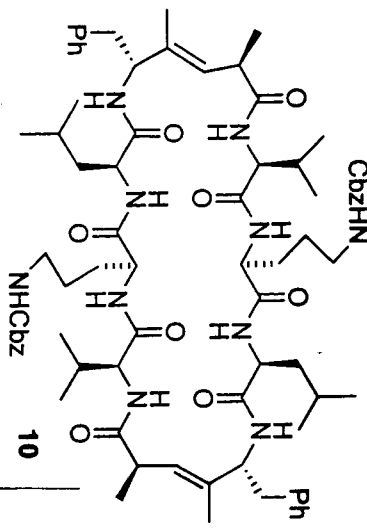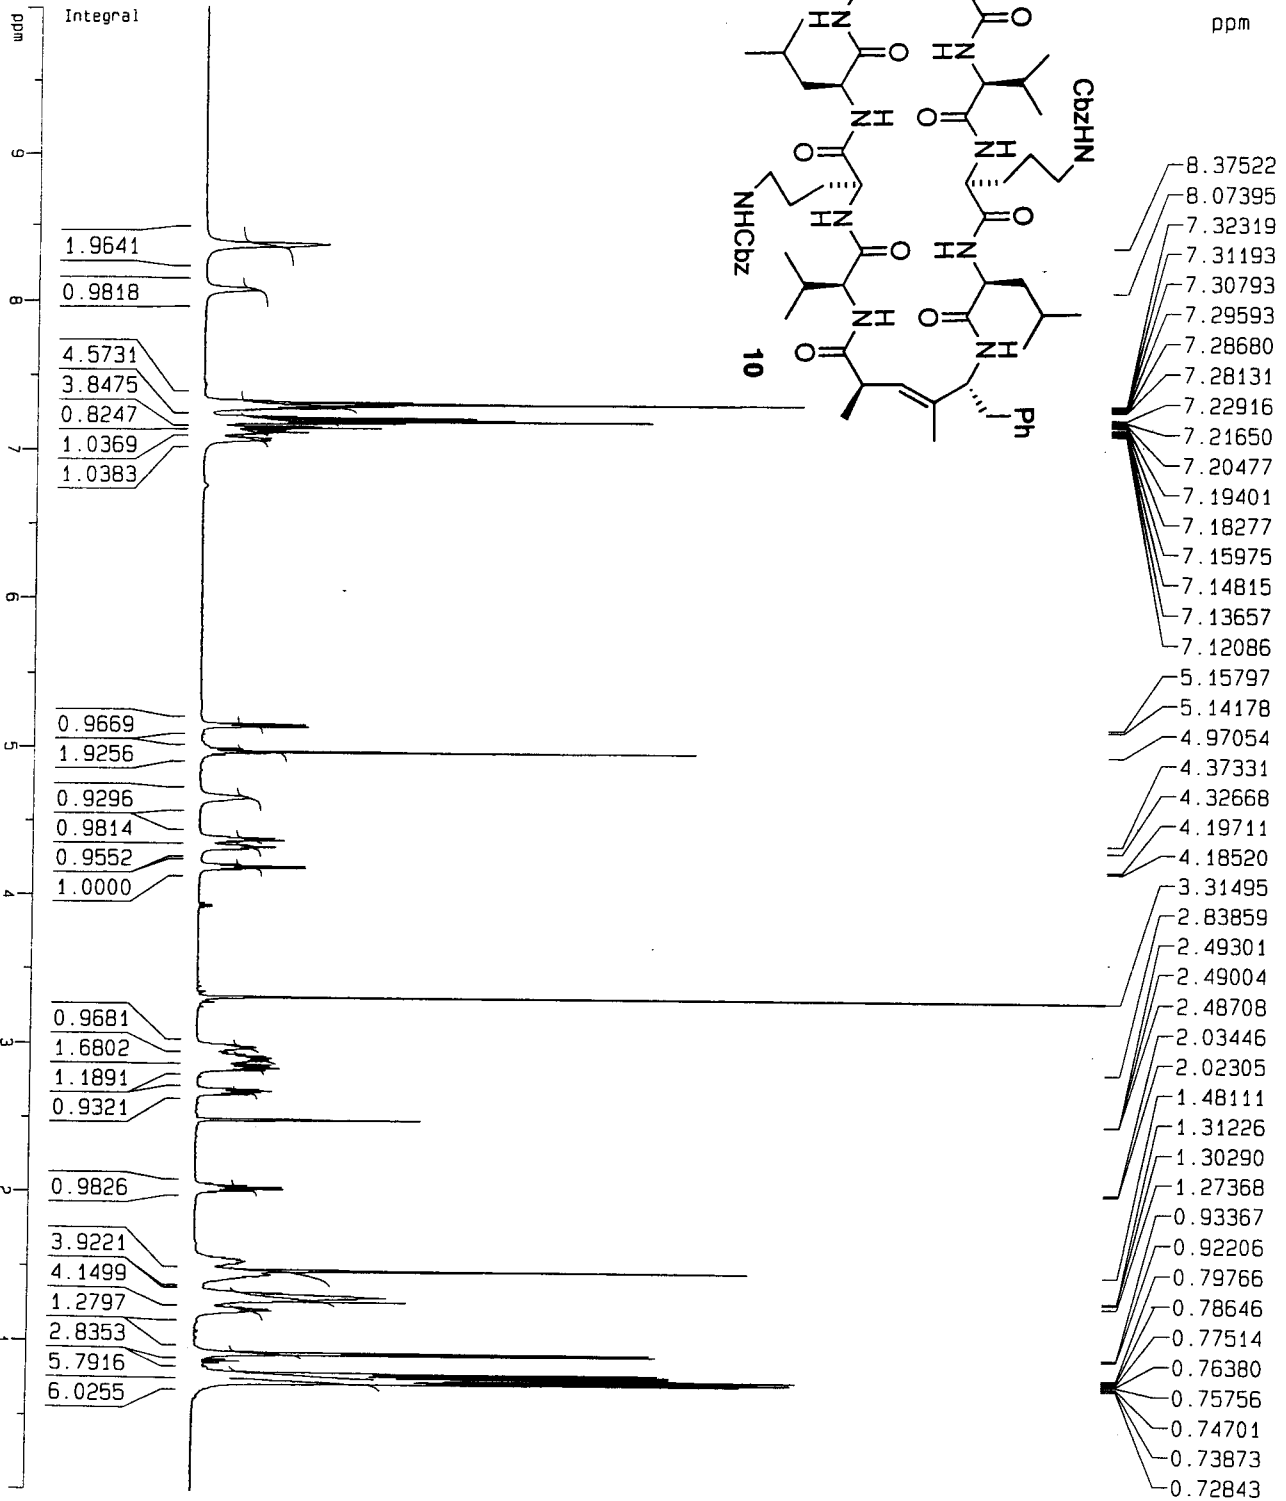

Current Data Parameters  
 NAME xjb-7-031-600  
 EXPNO 1  
 PROCNO 1

F2 - Acquisition Parameters  
 Date\_ 20050920  
 Time 11.39

INSTRUM spect  
 PROBD 5 mm TBI 1H/  
 PULPROG zg  
 TD 65536  
 SOLVENT CD2C12  
 NS 97  
 DS 0  
 SWH 8992.806 HZ  
 FIDRES 0.137219 HZ  
 AQ 3.6438515 sec  
 RG 1  
 DW 55.600 USE  
 DE 6.00 USE  
 TE 290.0 K  
 D1 3.00000000 sec

==== CHANNEL f1 ===  
 NUC1 1H  
 P1 9.00 USE  
 PL1 0.00 DB  
 SF01 600.8336050 MHZ

F2 - Processing parameters  
 SI 65536  
 SF 600.8300111 MHZ  
 MDW EM  
 SSB 0  
 LB 0.10 HZ  
 GB 0  
 PC 1.00

1D NMR plot parameters  
 CX 20.00 cm  
 F1P 10.000 ppr  
 F1 6008.30 HZ  
 F2P 0.000 ppr  
 F2 0.00 HZ  
 PPMCM 0.50000 ppr  
 HZCM 300.41501 HZ



xjb-7-031-600, DMSO-d6, 298K, 150MHZ

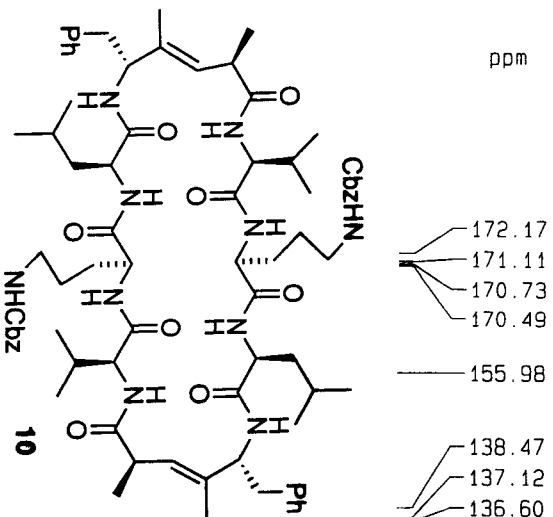

10

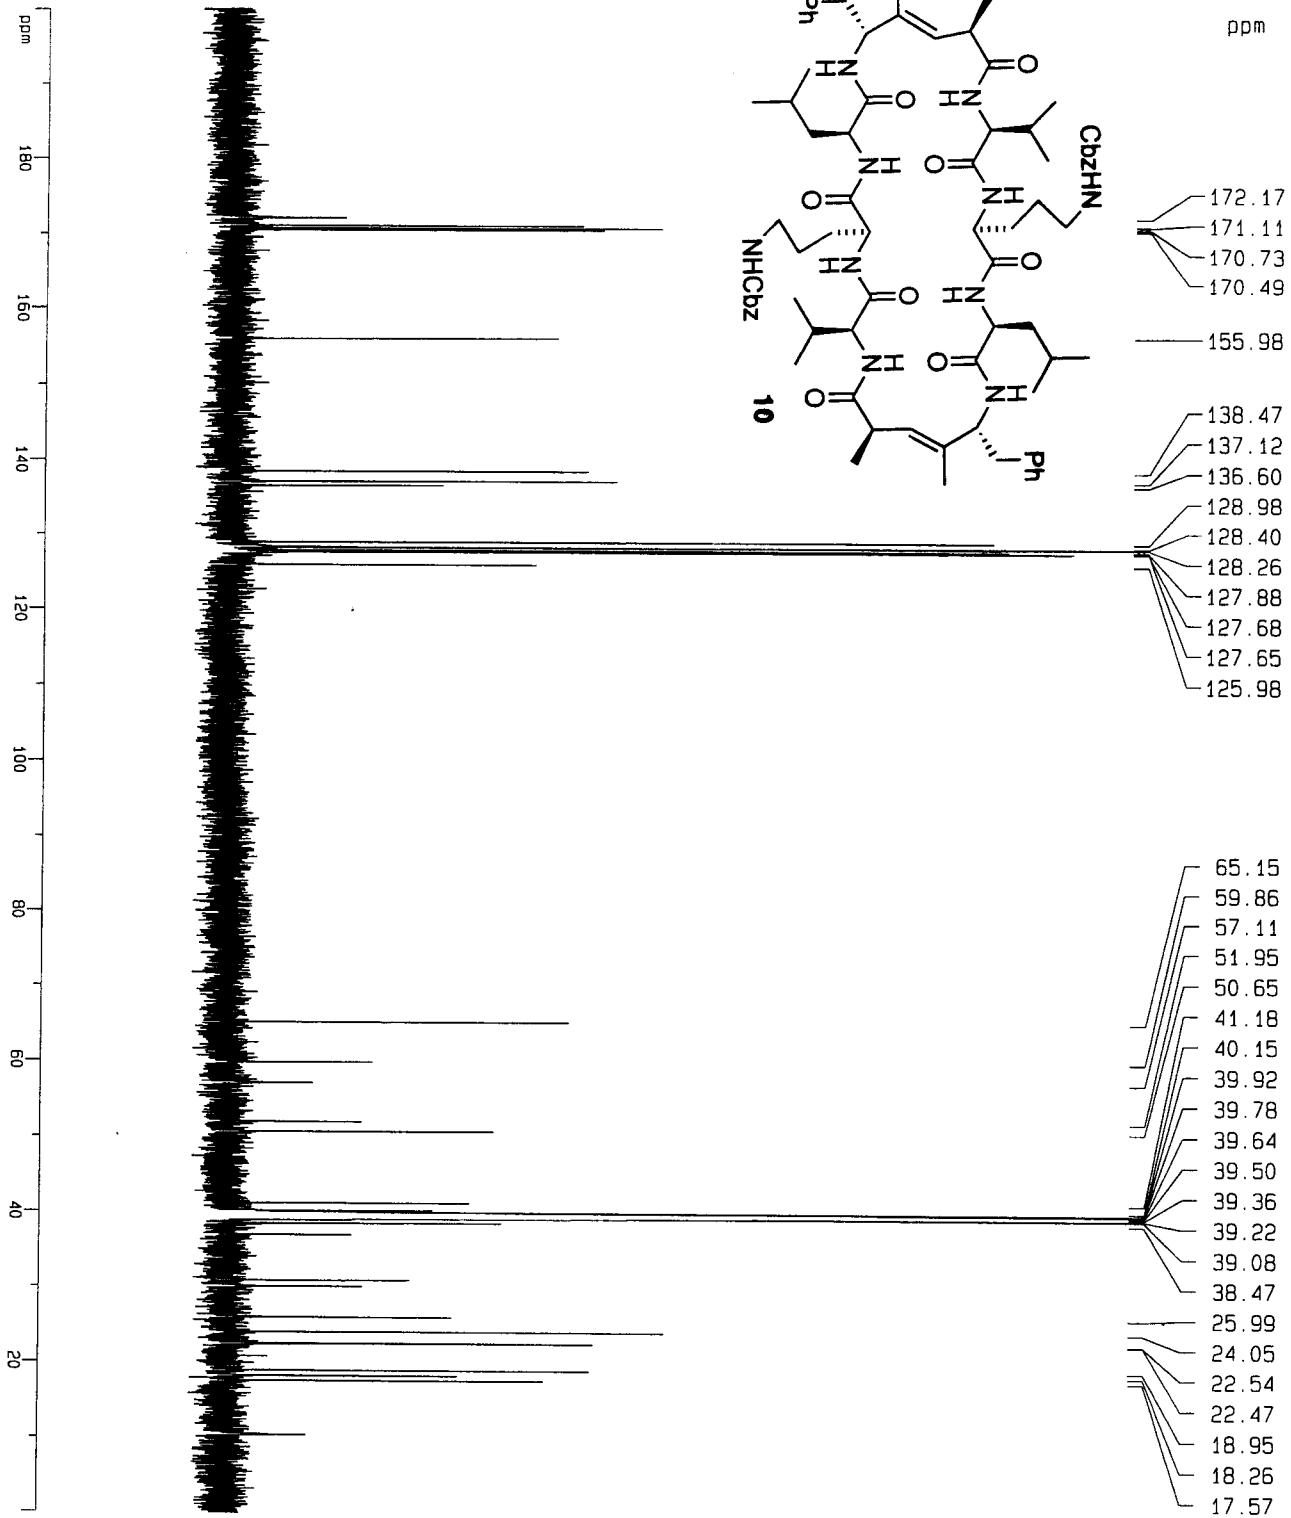

Current Data Parameters  
 NAME xjb-7-031-600  
 EXPNO 13  
 PROCNO 1

F2 - Acquisition Parameters

Date\_ 20050920  
 Time 11.51  
 INSTRUM spect  
 PROBHD 5 mm TBI 1H/  
 PULPROG c13winoe  
 TD 65536  
 SOLVENT CDC13  
 NS 2192  
 DS 0  
 SMH 37878.789 HZ  
 FIDRES 0.577984 HZ  
 AQ 0.9651252 sec  
 RG 32768  
 DW 13.200 usec  
 DE 6.00 usec  
 TE 290.0 K  
 D1 8.00000000 sec  
 D3 0.00100000 sec

===== CHANNEL f1 =====  
 NUC1 13C  
 P1 13.50 usec  
 PL1 0.00 dB  
 SF01 151.0953827 MHZ

===== CHANNEL f2 =====  
 CPDPRG2 waltz16  
 NUC2 1H  
 PCPD2 100.00 usec  
 PL2 0.00 dB  
 PL12 12.00 dB  
 SF02 600.8336050 MHZ

F2 - Processing parameters  
 SI 65536  
 SF 151.0789003 MHZ  
 MDW EM  
 SSB 0  
 LB 1.00 HZ  
 GB 0  
 PC 1.00

1D NMR plot parameters  
 CX 20.00 cm  
 F1P 200.000 ppm  
 F1 30215.78 HZ  
 F2P 0.000 ppm  
 F2 0.00 HZ  
 PPMCM 10.00000 ppm/cm  
 HZCM 1510.78906 HZ/cm

xjb-7-030-600, DMSO-d6, 600MHZ, 338K, 65 0C

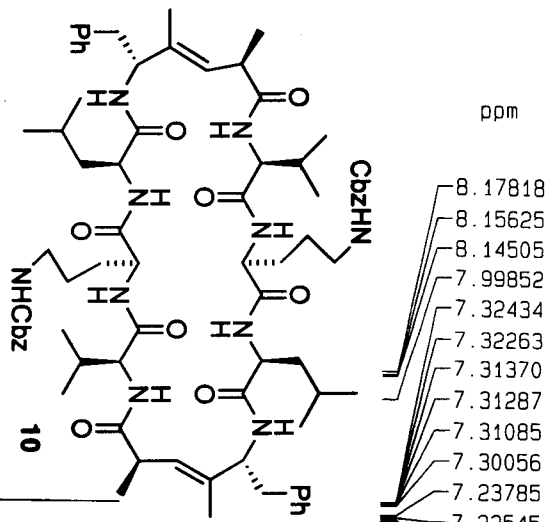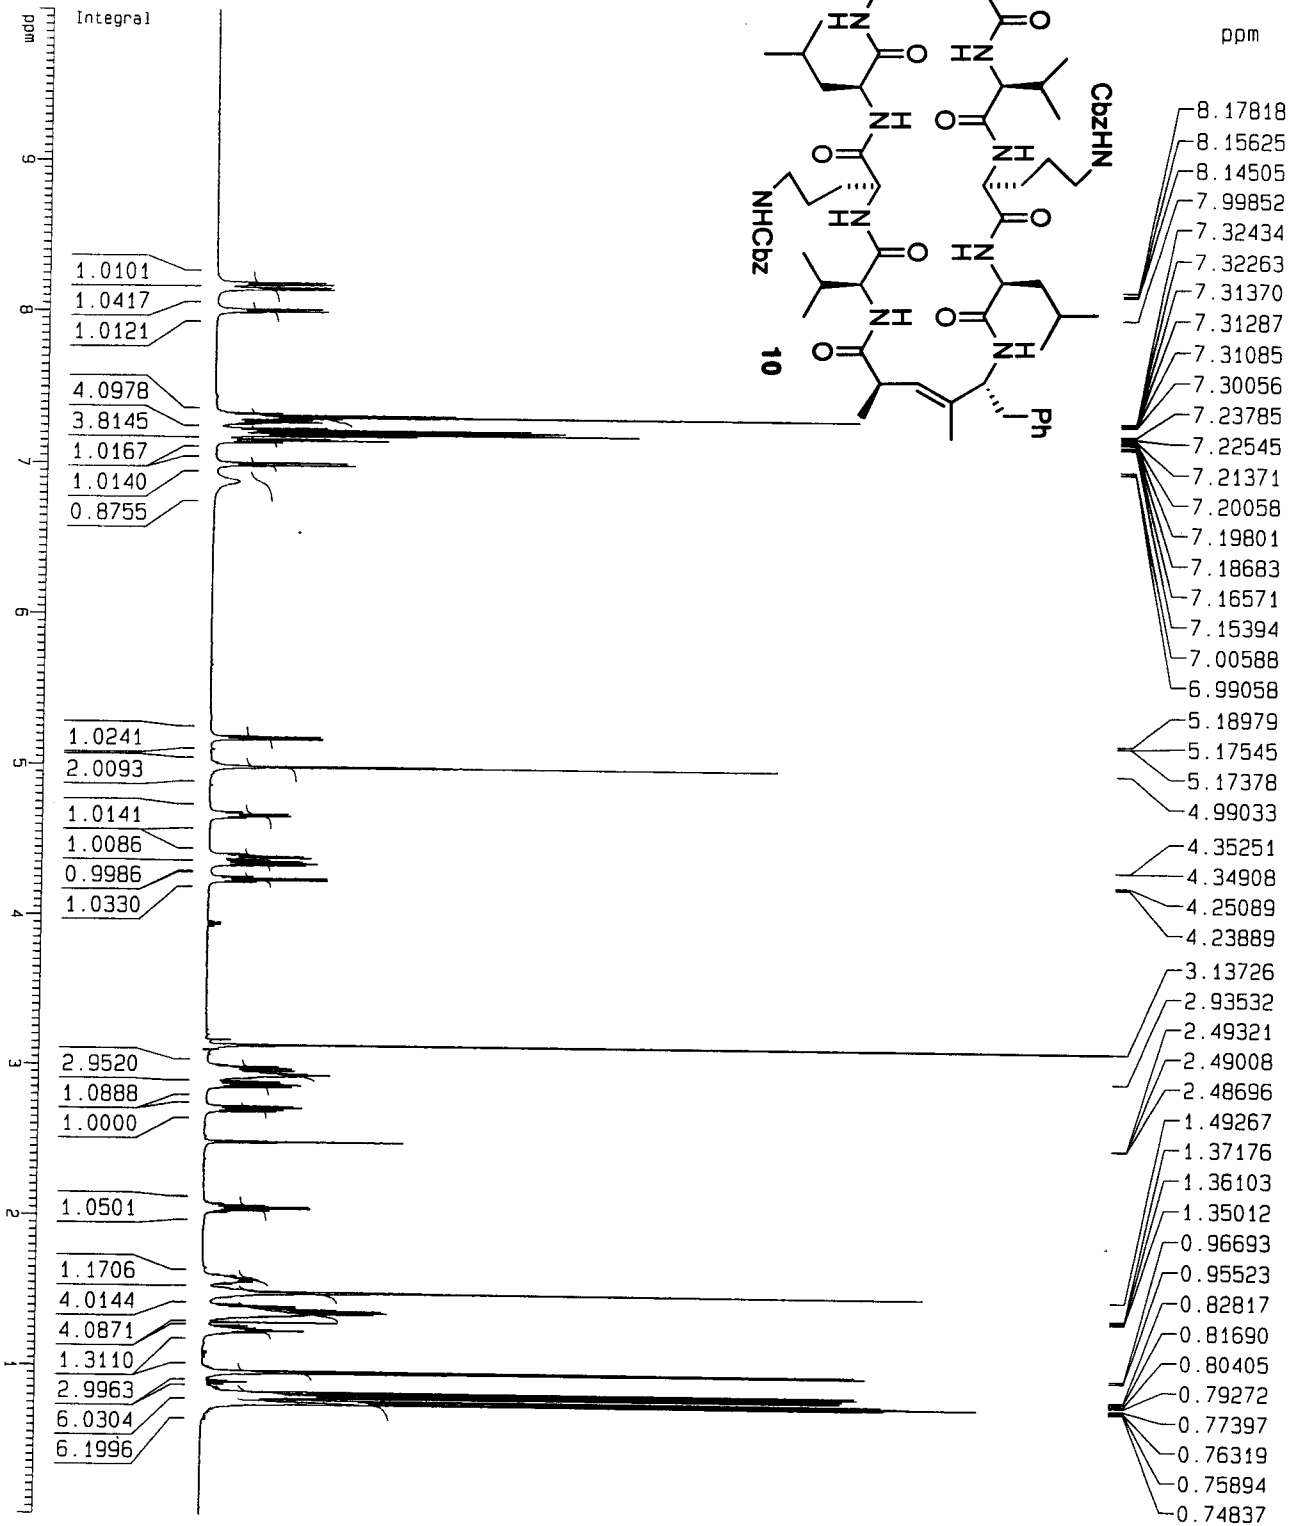

```

Current Data Parameters
NAME      xjb-7-030-600
EXPNO    1
PROCNO   1

F2 - Acquisition Parameters:
Date_    20050920
Time     22.13
INSTRUM  spect
PROBHD   5 mm TBI 1H/
PULPROG  zg
TD       65536
SOLVENT  CD2C12
NS       50
DS       0
SMH      8992.806 Hz
FIDRES   0.137219 Hz
AQ       3.6438515 sec
RG       2
DW       55.600 usec
DE       6.00 usec
TE       290.0 K
D1       3.00000000 sec

===== CHANNEL f1 =====
NUC1     1H
P1       9.00 usec
PL1     0.00 dB
SF01    600.8336050 MHz

F2 - Processing parameters
SI       65536
SF       600.8300114 MHz
WDW      EM
SSB      0
LB       0.10 Hz
GB       0
PC       1.00

1D NMR plot parameters
CX       20.00 cm
F1P     10.000 ppr
F1      6008.30 Hz
F2P     0.000 ppr
F2      0.00 Hz
PPMCM   0.50000 ppr
HZCM    300.41501 Hz
    
```

xjb-7-030-600, DMSO-d6, 600MHZ, 338K, 65 OC, C13 150 MHZ

Current Data Parameters  
 NAME xjb-7-030-600  
 EXPNO 2  
 PROCNO 1

F2 - Acquisition Parameters

Date\_ 20050921  
 Time 9.40  
 INSTRUM spect  
 PROBD 5 mm TBI 1H/  
 PULPROG c13wznoe  
 TD 65536  
 SOLVENT CDC13  
 NS 1267  
 DS 0  
 SMH 37878.789 Hz  
 FIDRES 0.577984 Hz  
 AQ 0.8651252 sec  
 RG 32768  
 DW 13.200 usec  
 DE 6.00 usec  
 TE 290.0 K  
 D1 8.0000000 sec  
 D3 0.0010000 sec

===== CHANNEL f1 =====  
 NUC1 13C  
 P1 13.50 usec  
 PL1 0.00 dB  
 SF01 151.0953827 MHz

===== CHANNEL f2 =====  
 CPDPRG2 waltz16  
 NUC2 1H  
 PCPD2 100.00 usec  
 PL2 0.00 dB  
 PL12 12.00 dB  
 SF02 600.8336050 MHz

F2 - Processing parameters  
 SI 65536  
 SF 151.0789437 MHz  
 WDM EM  
 SSB 0  
 LB 1.00 Hz  
 GB 0  
 PC 1.00

1D NMR plot parameters  
 CX 20.00 cm  
 F1P 200.000 ppm  
 F1 30215.79 Hz  
 F2P 0.000 ppm  
 F2 0.00 Hz  
 PPMCM 10.00000 ppm/cm  
 HZCM 1510.78955 Hz/cm

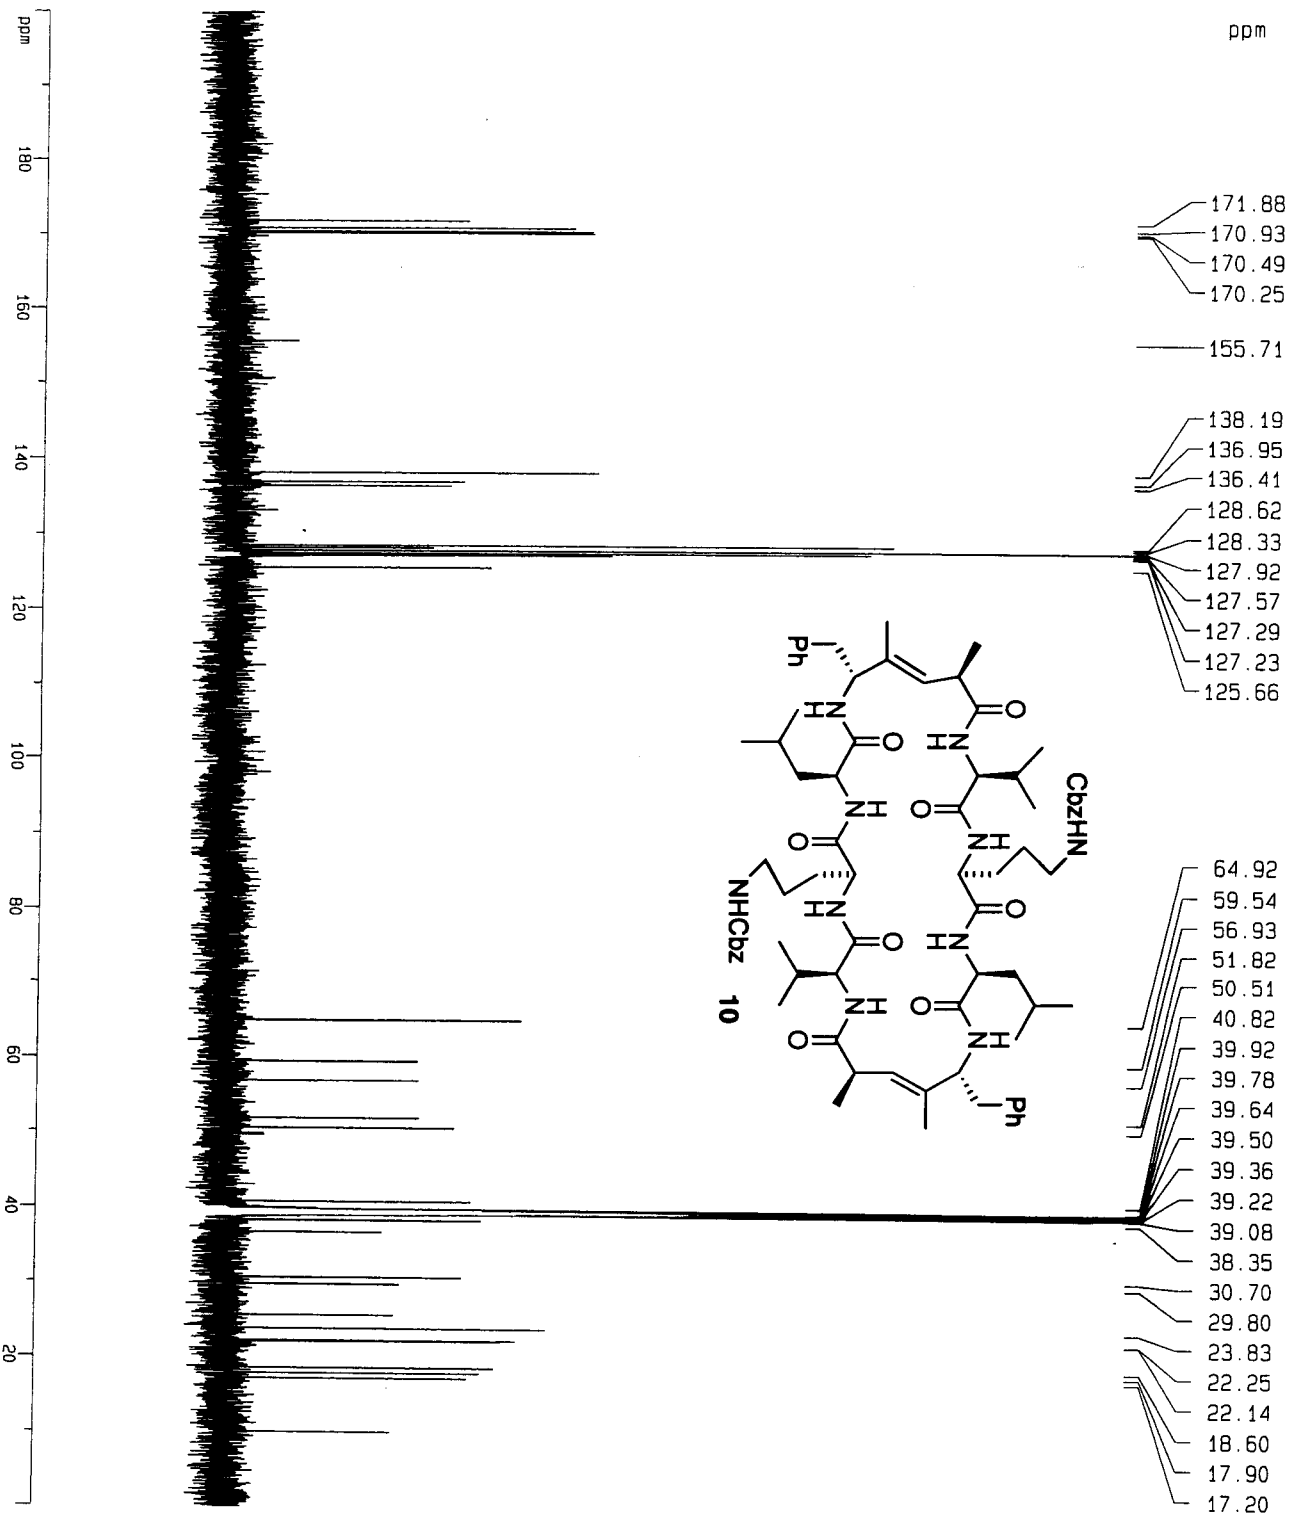

- 171.88
- 170.93
- 170.49
- 170.25
- 155.71
- 138.19
- 136.95
- 136.41
- 128.62
- 128.33
- 127.92
- 127.57
- 127.29
- 127.23
- 125.66
- 64.92
- 59.54
- 56.93
- 51.82
- 50.51
- 40.82
- 39.92
- 39.78
- 39.64
- 39.50
- 39.36
- 39.22
- 39.08
- 38.35
- 30.70
- 29.80
- 23.83
- 22.25
- 22.14
- 18.60
- 17.90
- 17.20

xjb-4-235, DMSO-d6, 600MHz, rt, Z-GS

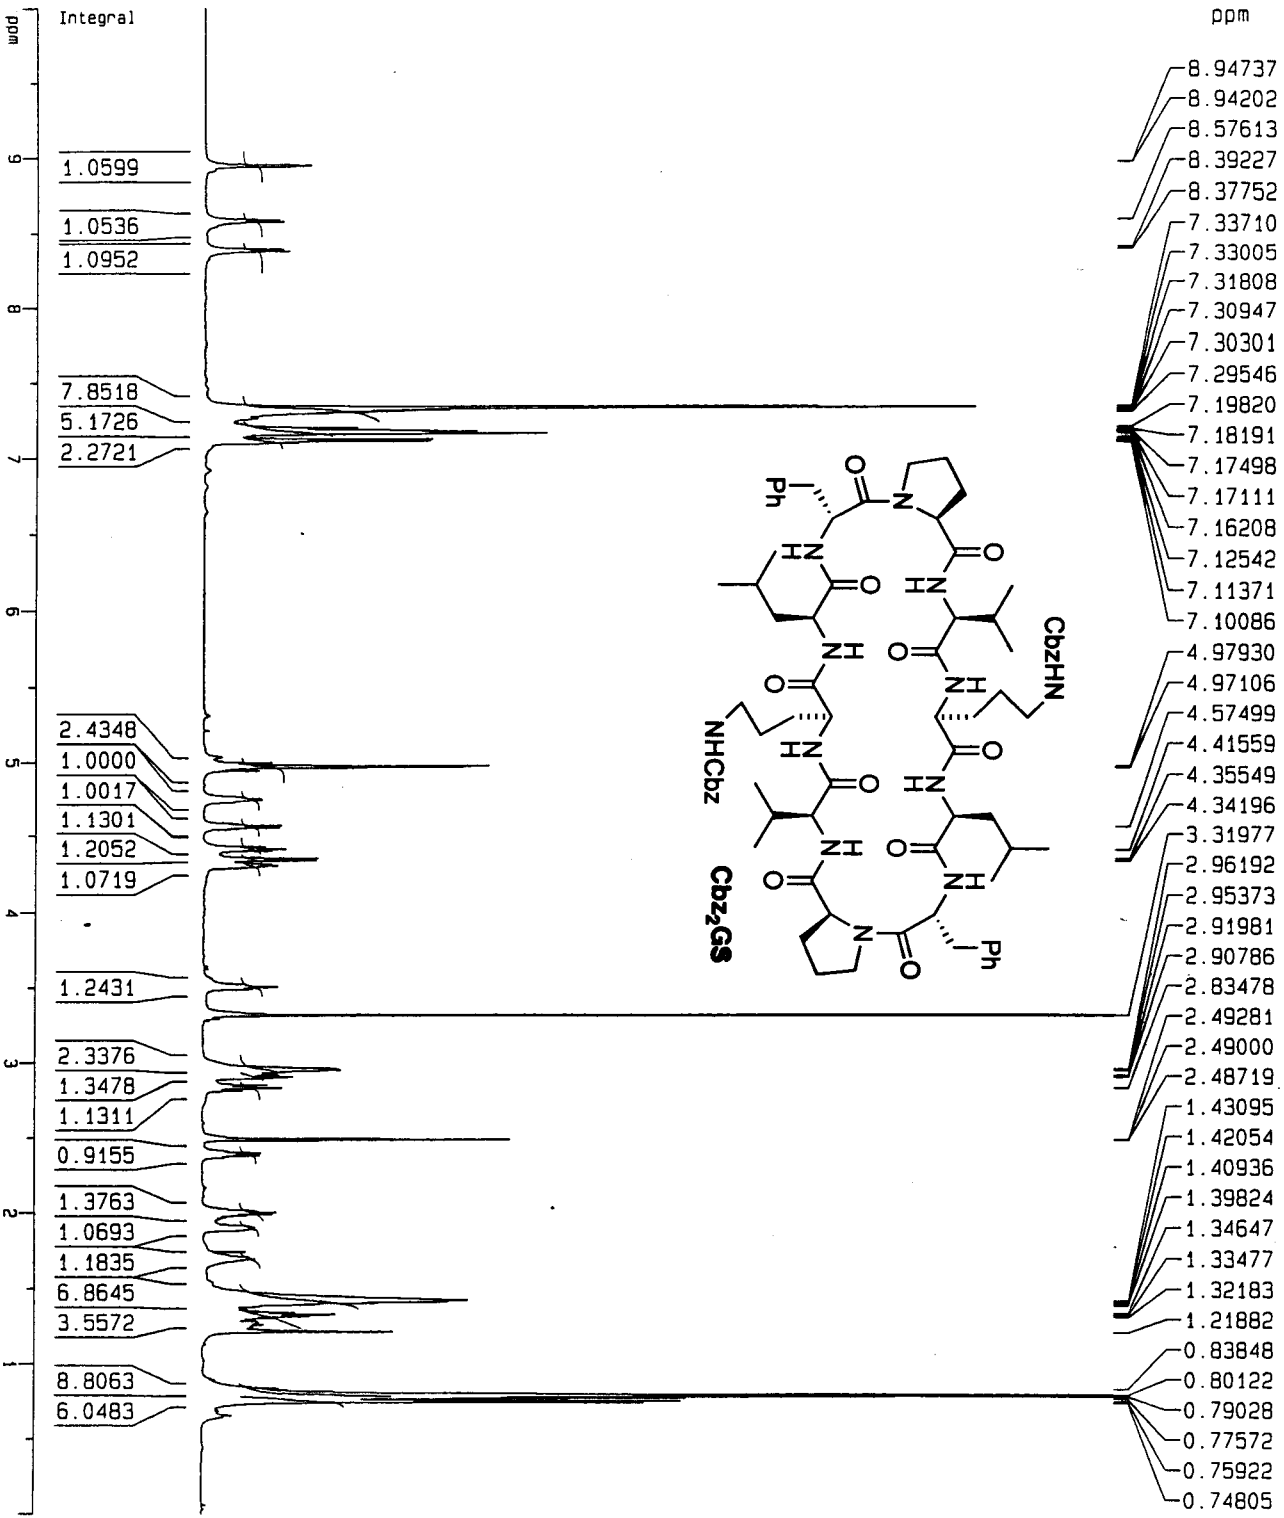

Current Data Parameters  
 NAME xjb-4-235-600  
 EXPNO 3  
 PROCNO 1  
 F2 - Acquisition Parameters:  
 Date\_ 20040303  
 Time 17.09  
 INSTRUM spect  
 PROBHD 5 mm TBI 1H/  
 PULPROG zg  
 TD 65536  
 SOLVENT CDCl2  
 NS 100  
 DS 0  
 SMH 8992.806 Hz  
 FIDRES 0.137219 Hz  
 AQ 3.6438515 sec  
 RG 2  
 DW 55.600 usec  
 DE 6.00 usec  
 TE 290.0 K  
 D1 6.00000000 sec

==== CHANNEL f1 ===  
 NUC1 1H  
 P1 9.00 usec  
 PL1 0.00 dB  
 SF01 600.8336050 MHz

F2 - Processing parameters  
 SI 65536  
 SF 600.8300108 MHz  
 MDM EM  
 SSB 0  
 LB 0.10 Hz  
 GB 0  
 PC 1.00

1D NMR plot parameters  
 CX 20.00 cm  
 F1P 10.000 ppr  
 F1 6008.30 Hz  
 F2P 0.000 ppr  
 F2 0.00 Hz  
 PPMCM 0.50000 ppr  
 HZCM 300.41501 Hz

xjb-4-235, DMSO-d6, 150MHZ, C13, Z-GS

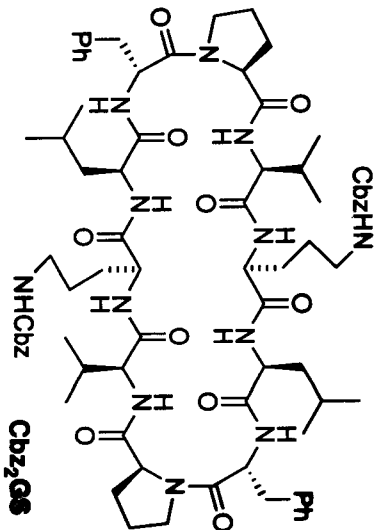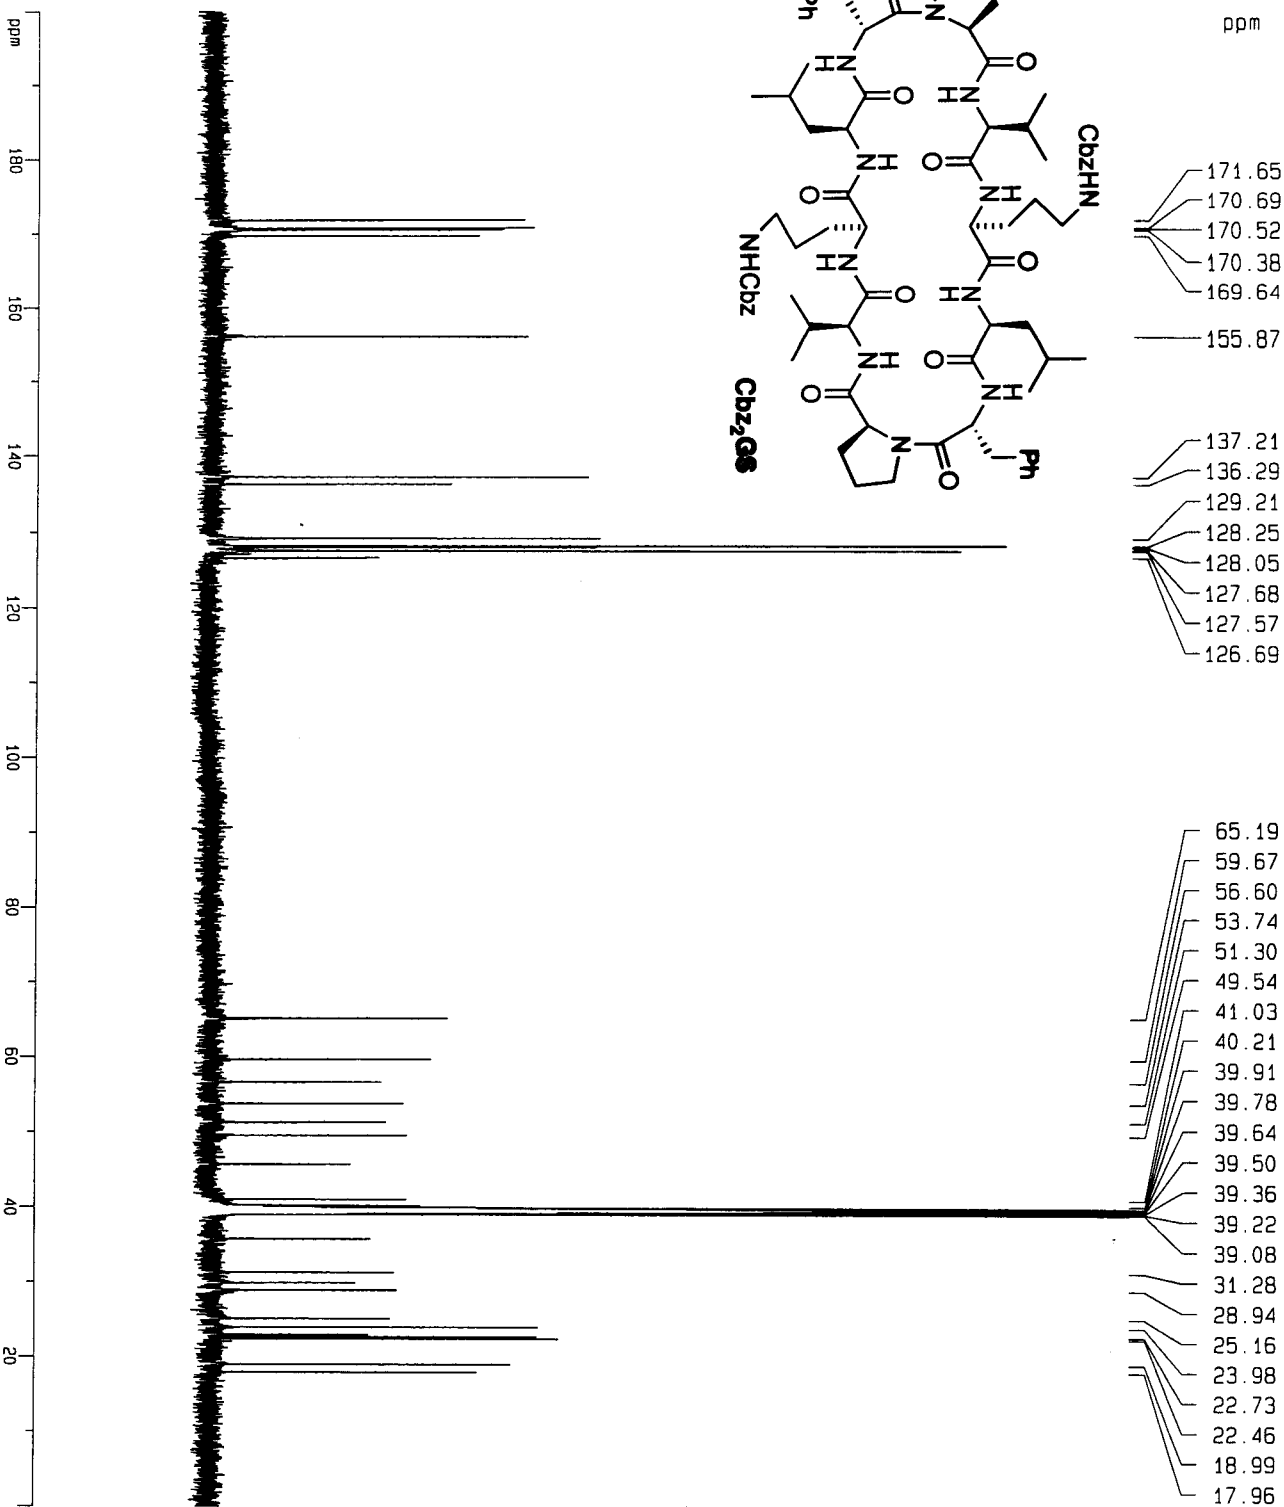

171.65  
170.69  
170.52  
170.38  
169.64  
155.87  
137.21  
136.29  
129.21  
128.25  
128.05  
127.68  
127.57  
126.69

65.19  
59.67  
56.60  
53.74  
51.30  
49.54  
41.03  
40.21  
39.91  
39.78  
39.64  
39.50  
39.36  
39.22  
39.08  
31.28  
28.94  
25.16  
23.98  
22.73  
22.46  
18.99  
17.96

Current Data Parameters  
NAME xjb-4-235-600  
EXPNO 2  
PROCNO 1

F2 - Acquisition Parameters

Date\_ 20040303  
Time 8.36  
INSTRUM spect  
PROBHD 5 mm TBI 1H/  
PULPROG c13winoe  
TD 65536  
SOLVENT CDCl3  
NS 3533  
DS 0  
SWH 37878.789 Hz  
FIDRES 0.577984 Hz  
AQ 0.8651252 sec  
RG 32768  
DW 13.200 usec  
DE 6.00 usec  
TE 290.0 K  
D1 8.00000000 sec  
D3 0.00100000 sec

==== CHANNEL f1 =====  
NUC1 13C  
P1 13.50 usec  
PL1 0.00 dB  
SF01 151.0953827 MHz

==== CHANNEL f2 =====  
CPDPRG2 waitz16  
NUC2 1H  
PCPD2 100.00 usec  
PL2 0.00 dB  
PL12 12.00 dB  
SF02 600.8336050 MHz

F2 - Processing parameters  
SI 65536  
SF 151.0789009 MHz  
WDW EM  
SSB 0  
LB 1.00 Hz  
GB 0  
PC 1.00

1D NMR plot parameters  
CX 20.00 cm  
F1P 200.000 ppm  
F1 30215.78 Hz  
F2P 0.000 ppm  
F2 0.00 Hz  
PPMCM 10.00000 ppm/cm  
HZCM 1510.78906 Hz/cm

10  
HMOC

xj1b-7-030-600, dmso-d6, 600mhz, 338k, 65 uc, hmoc

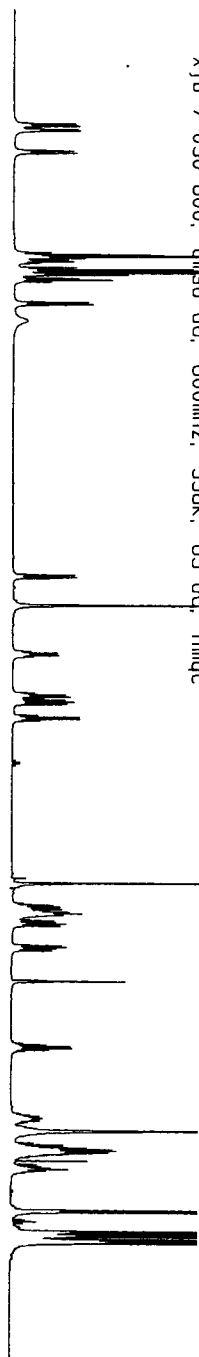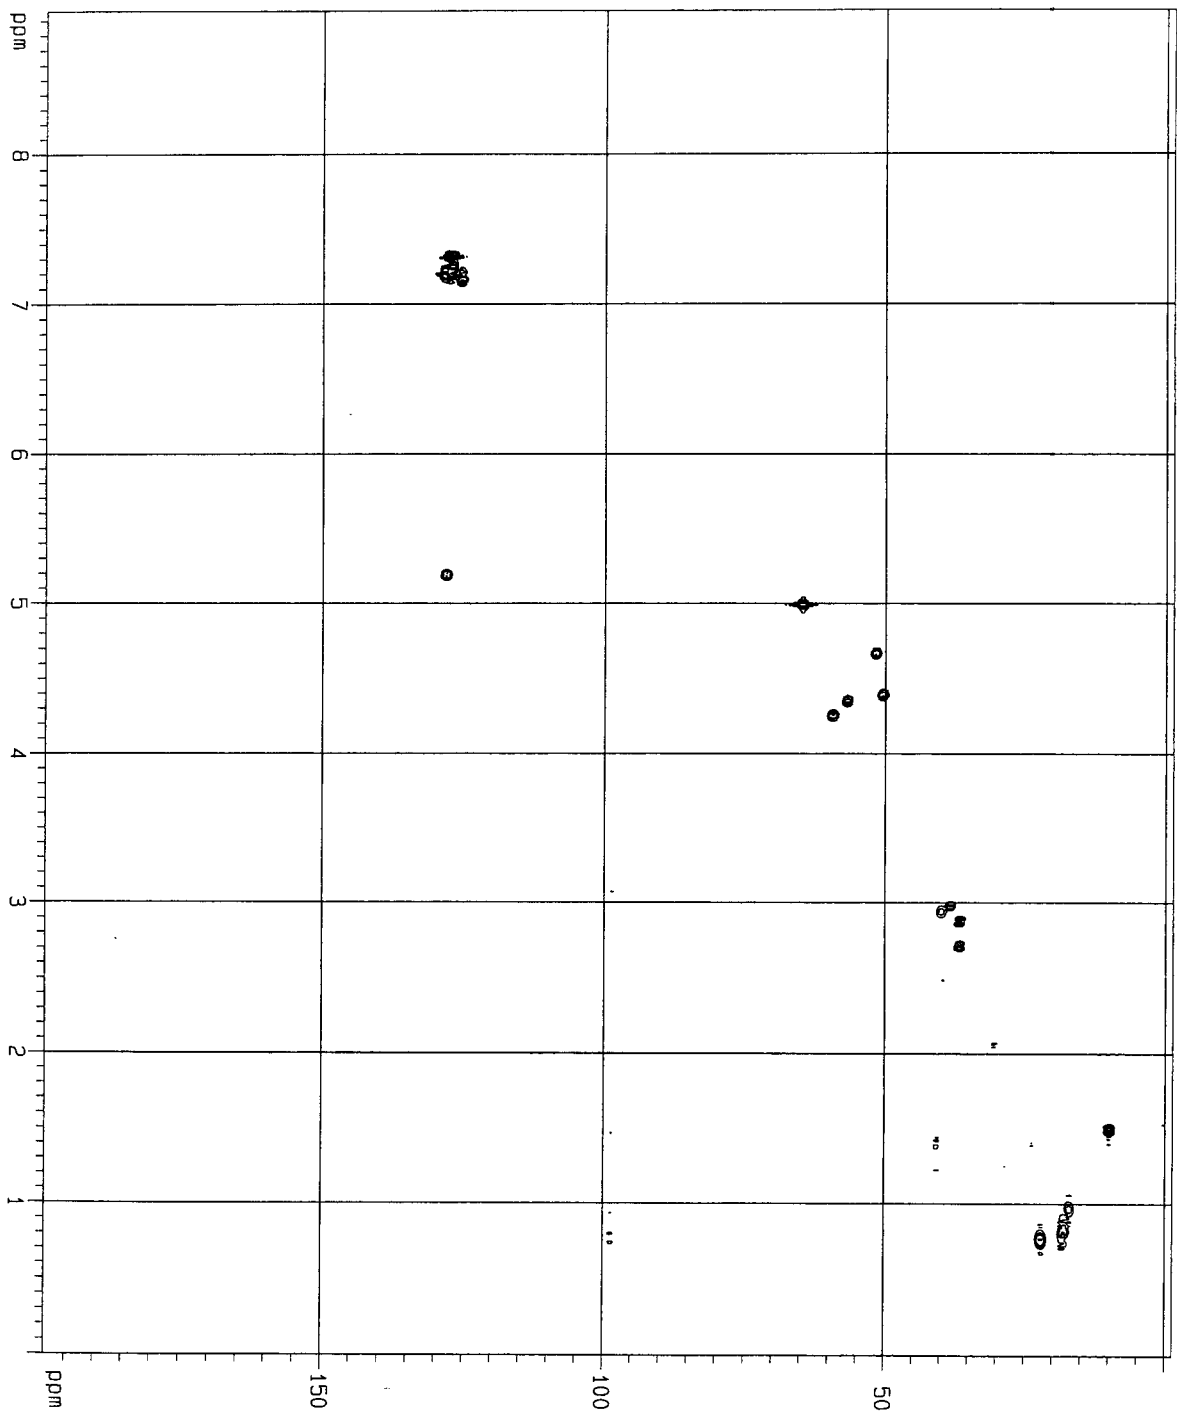

Current Data Params  
NAME xj1b-7-030-600  
EXPNO 12  
PROCNO 1

F2 - Acquisition Params

Date\_ 20050921  
Time 12.12  
INSTRUM spect  
PROBHD 5 mm 1H1H/  
PULPROG inv195  
TD 2048  
SOLVENT COC13  
NS 35  
DS 4  
SWH 5387.931 Hz  
FIDRES 2.630826 Hz  
AQ 0.1901044 sec  
RG 32758  
DM 92.800 us  
DE 6.00 us  
TE 310.0 K  
CNS12 145.0000000  
d0 0.00000300 sec  
d1 1.500000000 sec  
d12 0.00344828 sec  
d13 0.00002000 sec  
d16 0.00000300 sec  
d20 0.00242528 sec  
IND 0.00001695 sec

\*\*\*\*\* CHANNEL f1 \*\*

NUC1 1H  
P1 9.60 us  
P2 19.20 us  
PL1 0.00 dB  
SFO1 600.827037 MHz  
\*\*\*\*\* CHANNEL f2 \*\*  
CPDPRG2 garrp  
NUC2 13C  
P3 13.50 us  
PCPD2 100.00 us  
PL2 0.00 dB  
PL12 12.00 dB  
SFO2 151.0538719 MHz  
\*\*\*\*\* CHANNEL CHAN  
P16 1000.00 us

F1 - Acquisition Params

NOO 2  
TD 256  
SFO1 151.0539 MHz  
FIDRES 118.013586 Hz  
SN 199.952 ppm

F2 - Processing Params

SI 1024  
SF 600.8300110 MHz  
WDW SINE  
SSB 0  
LB 0.00 Hz  
GB 0  
PC 1.00

F1 - Processing Params

SI 1024  
SF 151.0798673 MHz  
WDW SINE  
SSB 0  
LB 0.00 Hz  
GB 0

2D NMR plot: param

CX2 16.00 cm  
CX1 15.00 cm  
F2PUL 8.595 ppm  
F2ALD 5386.71 Hz  
F2PH1 -0.002 ppm  
F2PH1 -1.22 Hz  
F1PUL 198.640 ppm  
F1ALD 30010.34 Hz  
F1PH1 -1.332 ppm  
F1PH1 -201.17 Hz  
F2PAPCK 299.32590 Hz  
F1PAPCK 13.33145 ppm  
F1H1ZCM 2014.10095 Hz

S39  
10  
HMBC

xj-b-7-030-600, DMSO-d6, 600MHZ, 33BK, 65 oC, HMBC

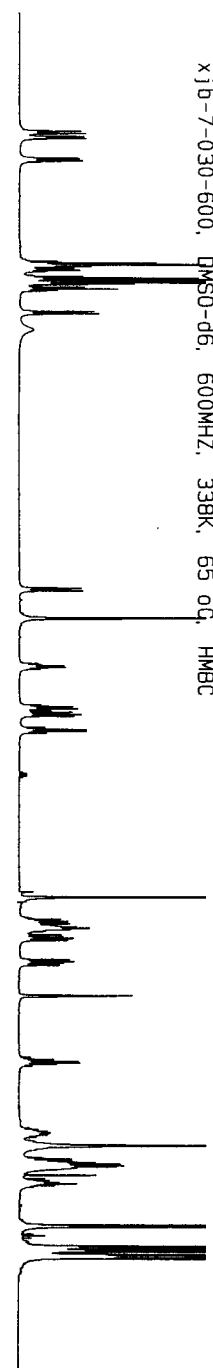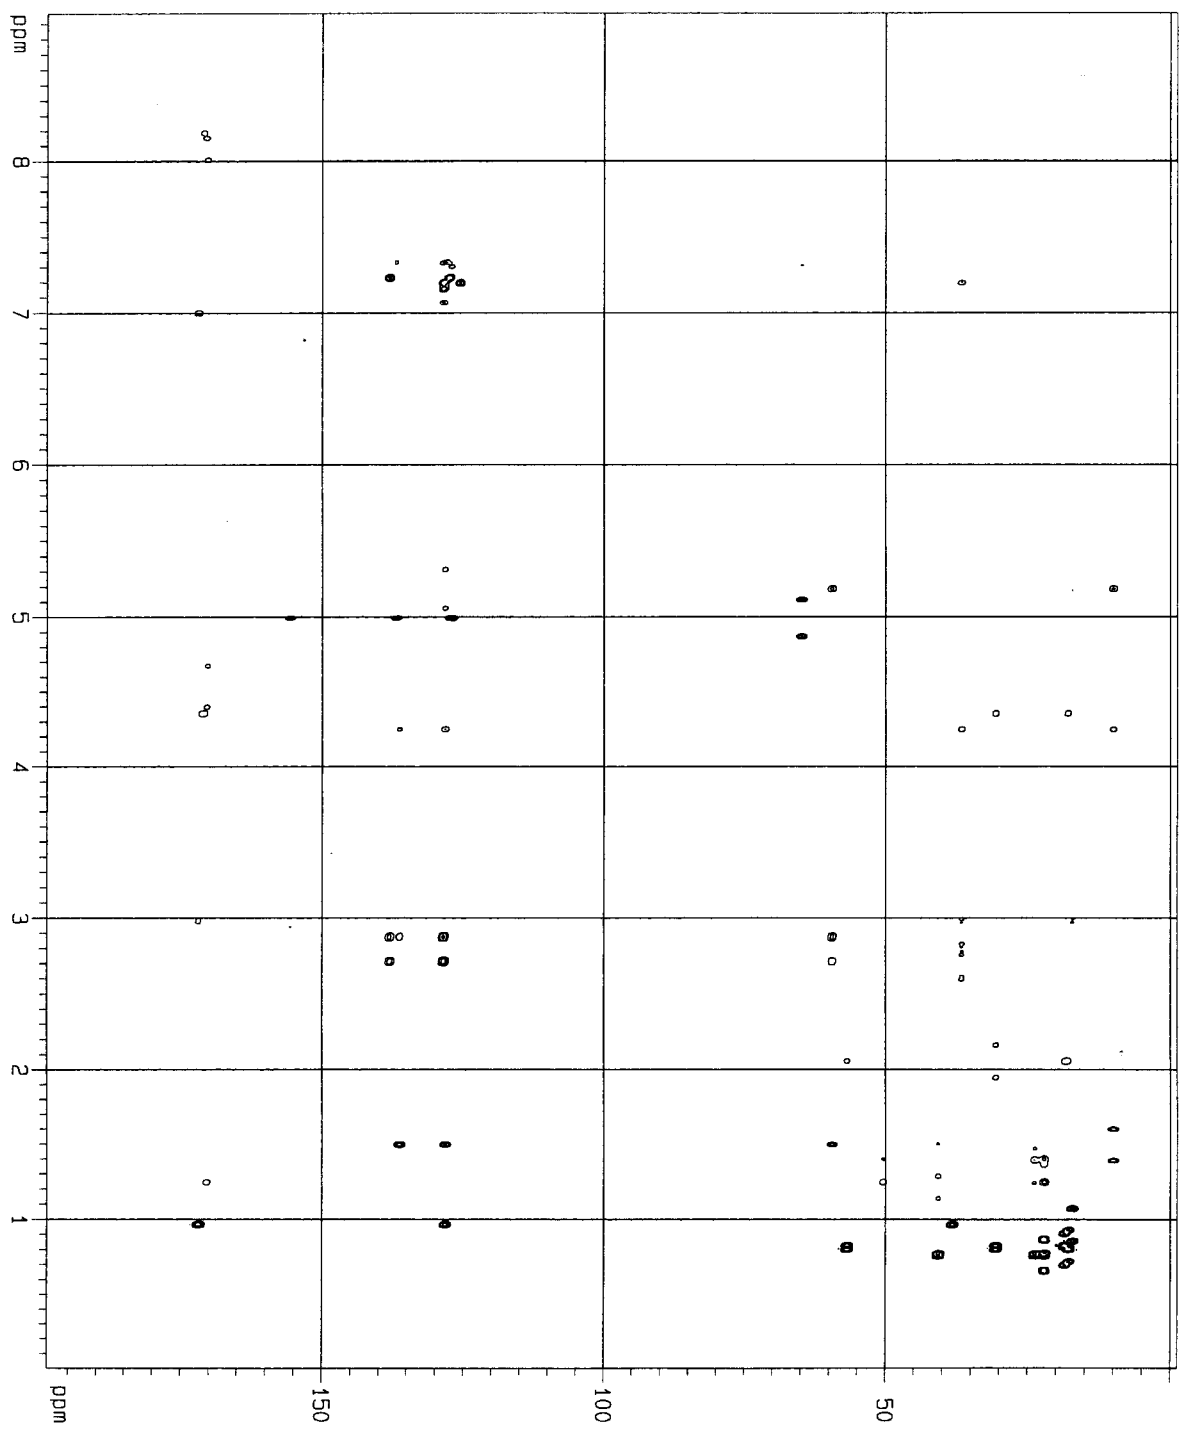

Current Data Parameters  
 NAME xj-b-7-030-600  
 EXPNO 1122  
 PROCNO 1

F2 - Acquisition Parameters  
 Date\_ 20050921  
 Time 0:54  
 INSTRUM spect  
 PROBRD 5 mm 1H1 1H/  
 PULPROG zgpg30  
 TD 4096  
 SOLVENT CUC13  
 NS 80  
 DS 4  
 SMH 5387.931 Hz  
 FIDRES 1.315413 Hz  
 AQ 0.3801582 sec  
 RG 32768  
 DM 92.800 usec  
 DE 6.00 usec  
 TE 310.0 K  
 DO 0.00000300 sec  
 D1 1.00000000 sec  
 D6 0.05000000 sec  
 D13 0.00000300 sec  
 D16 0.00050000 sec  
 INO 0.00001655 sec

\*\*\*\*\* CHANNEL f1 \*\*\*\*\*  
 NUC1 1H  
 P1 9.60 usec  
 P2 19.20 usec  
 PL1 0.00 dB  
 SFO1 600.8327037 MHz

\*\*\*\*\* CHANNEL f2 \*\*\*\*\*  
 NUC2 13C  
 P3 13.50 usec  
 PZ2 0.00 dB  
 SFO2 151.0539719 MHz

\*\*\*\*\* GRADIENT CHANNEL a \*\*\*\*\*  
 P16 1000.00 usec

F1 - Acquisition parameter  
 ND0 2  
 TD 256  
 SFO1 151.0539 MHz  
 FIDRES 118.013596 Hz  
 SM 159.952 ppm

F2 - Processing parameter  
 S1 1024  
 SF 600.830094 MHz  
 MDW SINE  
 SSB 0  
 LB 0.00 Hz  
 GB 0  
 PC 1.00

F1 - Processing parameter  
 S1 2048  
 GC  
 SF 151.0789546 MHz  
 MDW SINE  
 SSB 0  
 LB 0.00 Hz  
 GB 0

2D NMR plot parameters  
 CX2 18.00 cm  
 CY1 15.00 cm  
 F2PL0 8.968 ppm  
 F2L0 5388.33 Hz  
 F2PH1 0.001 ppm  
 F2H1 0.40 Hz  
 F2PL0 188.724 ppm  
 F2L0 30022.97 Hz  
 F2PH1 -1.248 ppm  
 F2H1 -188.51 Hz  
 F2PH0M 0.4819 nm/cm  
 F2HZCK 299.3260 1/7cm  
 F2PH0M 13.33143 dm/cm  
 F2HZCK 2014.03863 1/77cm

101  
COSY

xjb-7-030-600, DMSO-d6, 600MHZ, 33BK, 65 OC, COSY

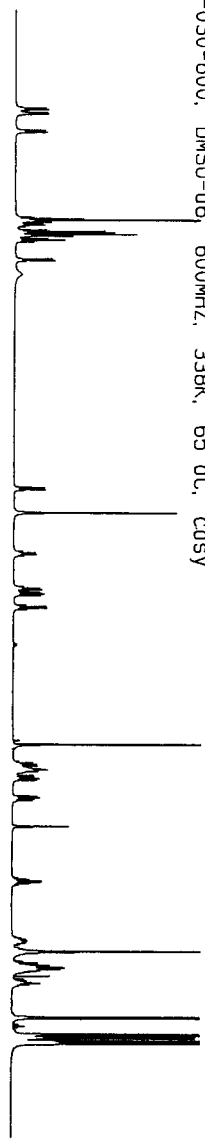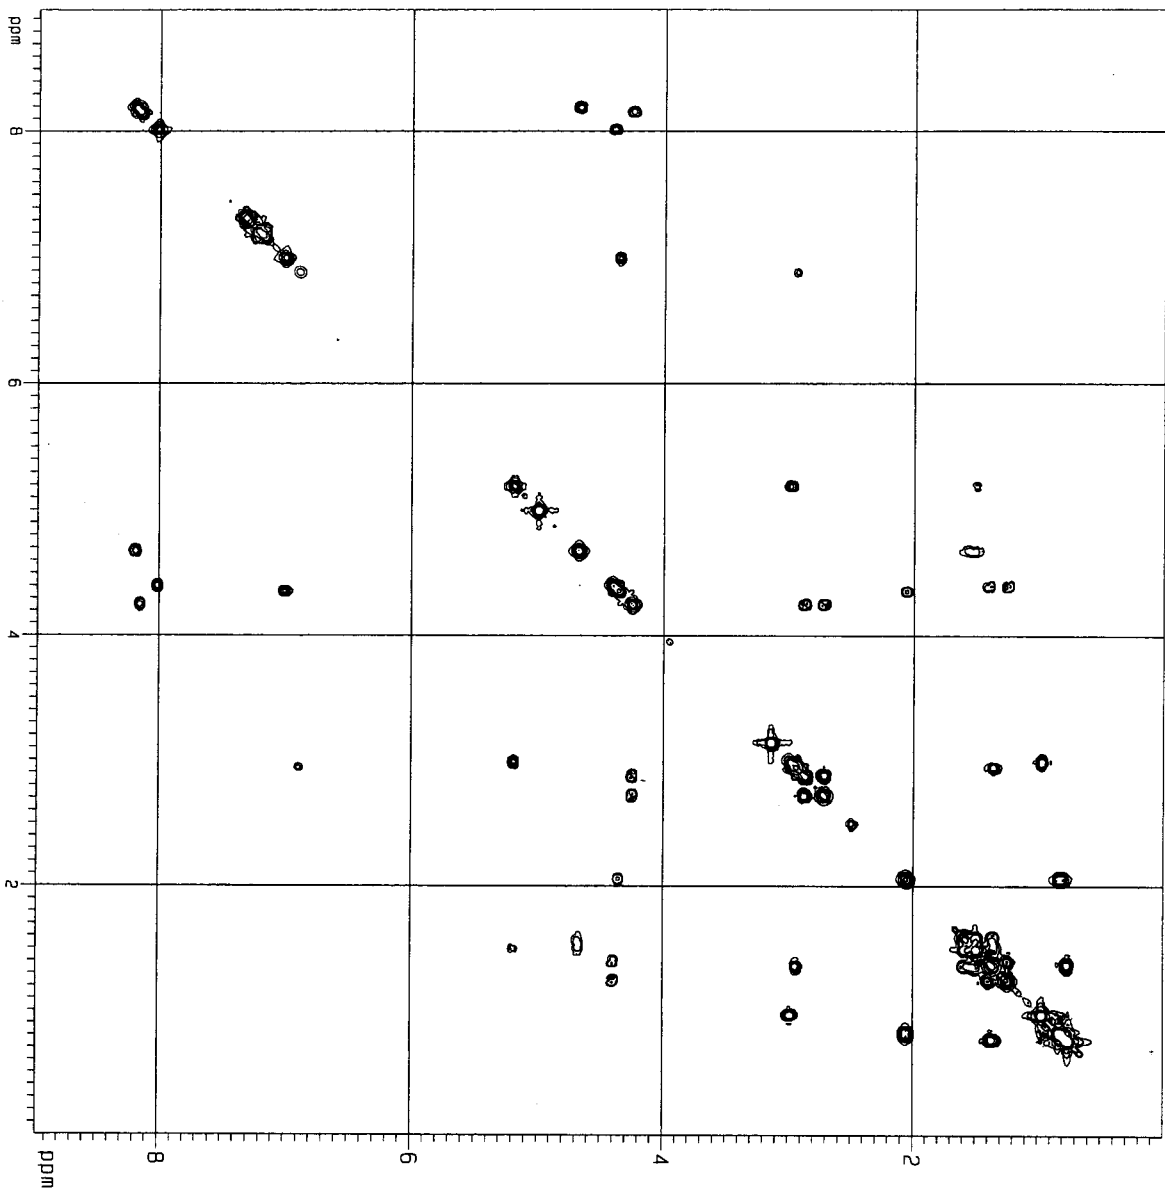

Current Data Parameters  
 NAME: xjb-7-030-600  
 EXPNO: 11  
 PROCNO: 1

F2 - Acquisition Parameters

Date\_: 20050920  
 Time: 22.28  
 INSTRUM: spect  
 PULPROG: 5 mm 1H1  
 PROGRAM: cosy  
 T0: 1024  
 SOLVENT: DMS-D6  
 NS: 30  
 DS: 16  
 SWH: 5387.931 Hz  
 FIDRES: 0.0950772 sec  
 AQ: 100  
 RG: 92.800 usec  
 DE: 6.00 usec  
 TE: 290.0 K  
 DD: 0.00000300 sec  
 O1: 1.00000000 sec  
 INO: 0.00018950 sec

CHANNEL f1

NUC1: 1H  
 P0: 8.20 usec  
 P1: 9.60 usec  
 PL1: 0.00 dB  
 SFO1: 600.8327037 MHz

F1 - Acquisition Parameters

ND0: 1  
 T0: 256  
 SFO1: 600.8327 MHz  
 FIDRES: 21.046506 Hz  
 SW: 8.967 ppm

F2 - Processing Parameters

SI: 512  
 SF: 600.8300081 MHz  
 MDW: SINE  
 SSB: 0  
 LB: 0.00 Hz  
 GB: 0  
 PC: 1.00

F1 - Processing Parameters

SI: 512  
 DF: 512  
 MC2: 500.8300080 MHz  
 SF: SINE  
 MDW: 0  
 SSB: 0  
 LB: 0.00 Hz  
 GB: 0

2D NMR plot parameters

CX2: 15.00 cm  
 CX1: 15.00 cm  
 F2PLO: 8.970 ppm  
 F2LO: 5389.59 Hz  
 F2PH1: 0.003 ppm  
 F2H1: 1.66 Hz  
 F1PLO: 8.970 ppm  
 F1LO: 5389.59 Hz  
 F1PH1: 0.003 ppm  
 F1H1: 1.76 Hz  
 F2PNUC: 0.58293 ppm/cm  
 F2NUC: 359.19340 Hz/cm  
 F1PNUC: 0.59783 ppm/cm  
 F1NUC: 359.19540 Hz/cm



S41  
10  
NOESY

xjb-7-030-600, DMSO-d6, 228K, 65 cc, noesy, 600MHZ

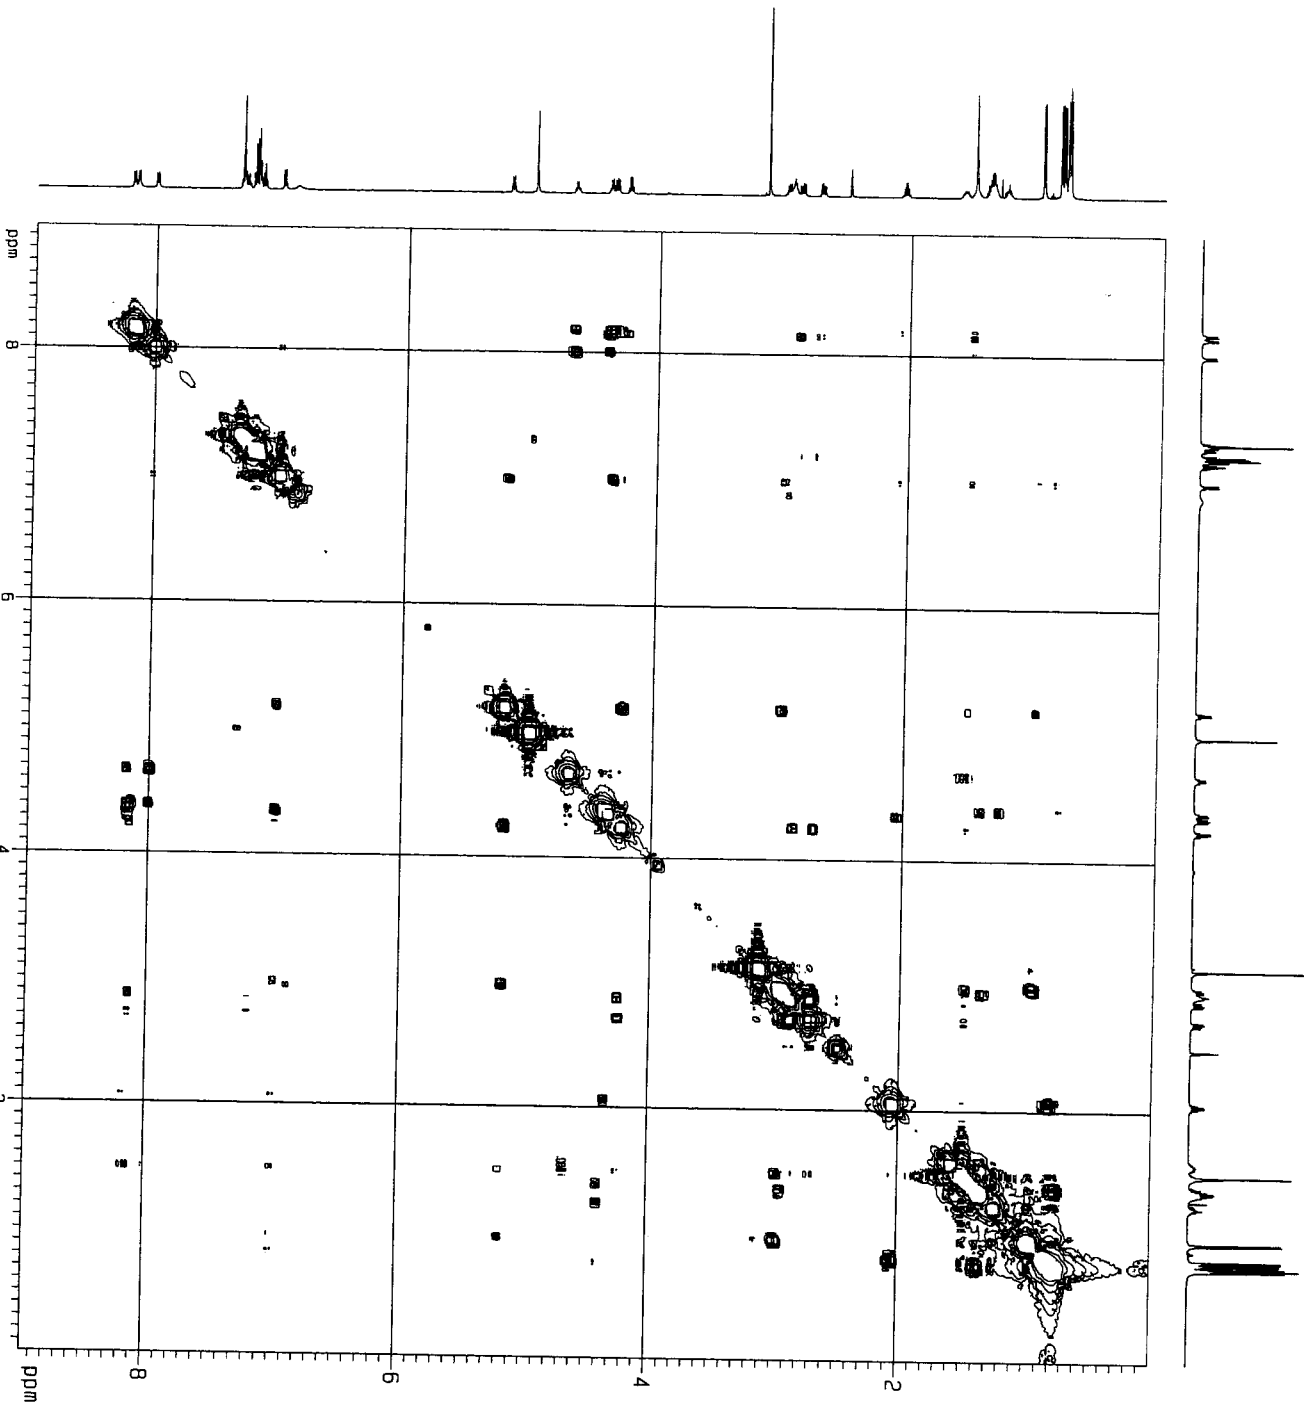

Current Data Parameters  
 NAME xjb-7-030-600  
 EXNO 1111  
 PROCNO 1

F2 - Acquisition Parameters

Date\_ 20050921  
 Time 18.32  
 INSTRUM spect  
 PROBHD 5 mm 1H1 H/  
 PULPROG noesy1d  
 TD 1024  
 SOLVENT DMSO-D6  
 NS 70  
 DS 16  
 SWH 5387.931 Hz  
 FIDRES 5.261652 Hz  
 AQ 0.0950772 sec  
 RG 60  
 DM 92.800 usec  
 DE 6.00 usec  
 TE 290.0 K  
 D0 0.00000300 sec  
 D1 1.00000000 sec  
 DB 0.34699999 sec  
 INO 0.0000280 sec

\*\*\*\*\* CHANNEL f1 \*\*\*\*\*

NUC1 1H  
 P1 13.50 usec  
 PL1 0.00 dB  
 SFO1 600.8327037 MHz

F1 - Acquisition Parameters

ND0 2  
 TD 256  
 SFO1 600.8327 MHz  
 FIDRES 21.046606 Hz  
 SW 8.967 ppm

F2 - Processing parameters

SI 1024  
 SF 600.8300080 MHz  
 WDW SINE  
 SSB 0  
 LB 0.00 Hz  
 GB 0  
 PC 0.10

F1 - Processing parameters

SI 1024  
 MC2 TPPI  
 SF 600.8300076 MHz  
 NDM SINE  
 SSB 0  
 LB 0.00 Hz  
 GB 0

2D NMR plot parameters

CX2 15.00 cm  
 CX1 15.00 cm  
 F2PULO 8.970 ppm  
 F2LO 5389.71 Hz  
 F2PPI 0.003 ppm  
 F2HI 1.77 Hz  
 F2PULO 8.971 ppm  
 F2LO 5390.06 Hz  
 F2PPI 0.004 ppm  
 F2HI 2.13 Hz  
 F2PPICM 0.59783 ppm/cm  
 F2HZCM 359.19540 Hz/cm  
 F1PPICM 0.59783 ppm/cm  
 F1HZCM 359.19540 Hz/cm

# S42 1D ROESY

xjb-7-30-600, DMSO-d6, 33BK, 86 o.c, 600MHZ, ROESY

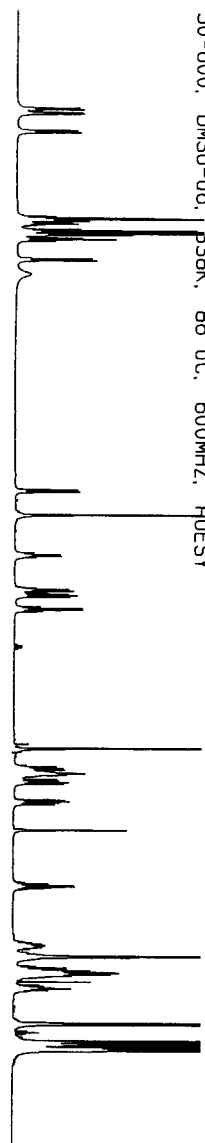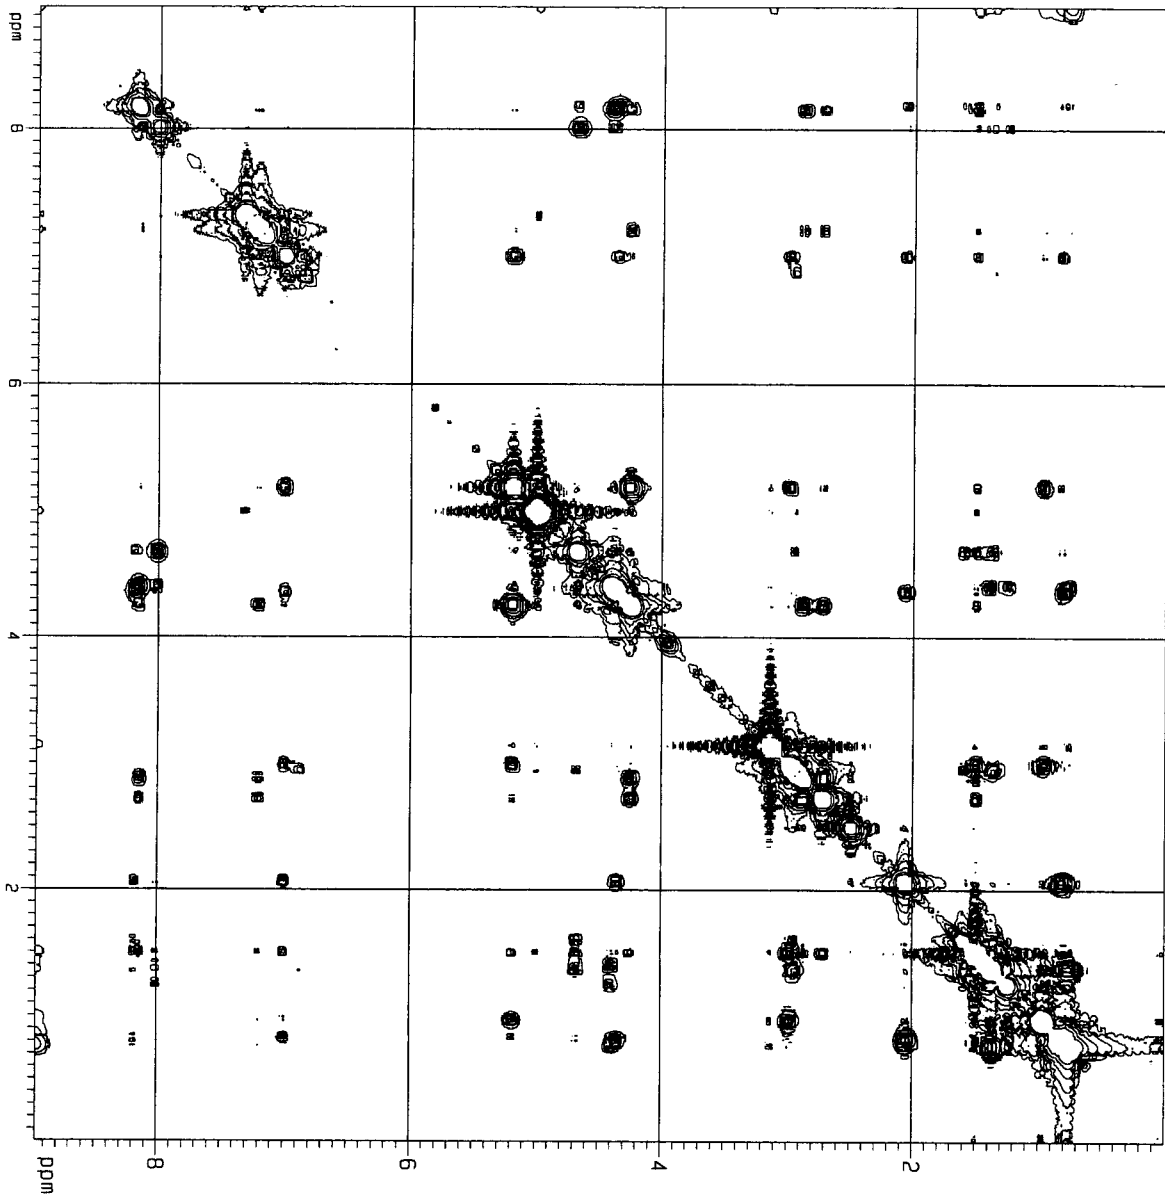

Current Data Parameters  
 NAME xjb-7-030-600  
 EXPNO 2222  
 PROCNO 1

F2 - Acquisition Parameters

Date\_ 20050922  
 Time 1.48  
 INSTRUM spect  
 PPROBHD 5 mm 1B1 1H/  
 PULPROG roesy1p  
 TD 1024  
 SOLVENT CDCl3  
 NS 70  
 DS 16  
 SMH 5387.931 Hz  
 FIDRES 5.261652 Hz  
 AQ 0.0950772 sec  
 RB 60  
 DM 92.800 usec  
 DE 6.00 usec  
 TE 290.0 K  
 D0 0.00000300 sec  
 O1 1.00000000 sec  
 d12 0.00002000 sec  
 INO 0.00009280 sec

CHANNEL f1

NUC1 1H  
 P1 9.00 usec  
 P15 250000.00 usec  
 PL1 0.00 dB  
 PL11 24.00 dB  
 SF01 600.8327037 MHz

F1 - Acquisition Parameters

NO 2  
 TD 256  
 SF01 600.8327 MHz  
 FIDRES 21.046606 Hz  
 SN 8.567 DDM

F2 - Processing parameters

SI 1024  
 SF 600.8300088 MHz  
 WDW SINE  
 SSB 0  
 LB 0.00 Hz  
 GB 0  
 PC 0.10

F1 - Processing parameters

SI 1024  
 MC2 1pp1  
 SF 600.8300088 MHz  
 WDM SINE  
 SSS 0  
 LB 0.00 Hz  
 GB 0

2D NMR Plot parameters

CX2 15.00 cm  
 CX1 15.00 cm  
 F2HLO 8.570 ppm  
 F2LLO 5389.45 Hz  
 F2PHI 0.003 ppm  
 F2H1 1.52 Hz  
 F1HLO 8.969 ppm  
 F1LLO 5388.88 Hz  
 F1PHI 0.002 ppm  
 F1H1 0.95 Hz

F2PPIXCM 0.59783 ppm/cm  
 F2HZCM 359.19540 Hz/cm  
 F1PPIXCM 0.59783 ppm/cm  
 F1HZCM 359.19540 Hz/cm

S43  
Cb<sub>2</sub>GS  
HMOC

x]b-4-235, DMSO-d<sub>6</sub>, rt, NMQC, 600MHz, Z-GS

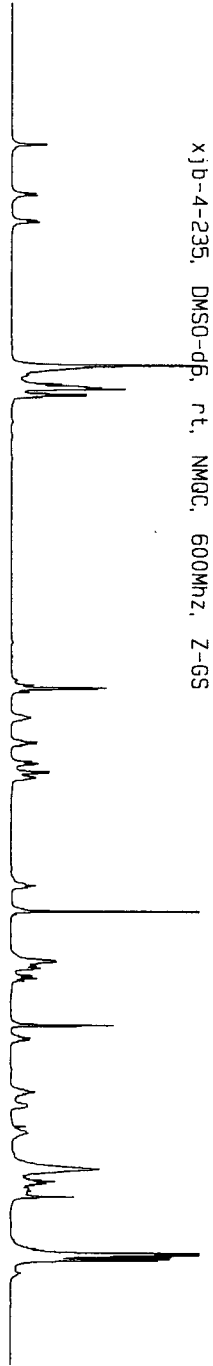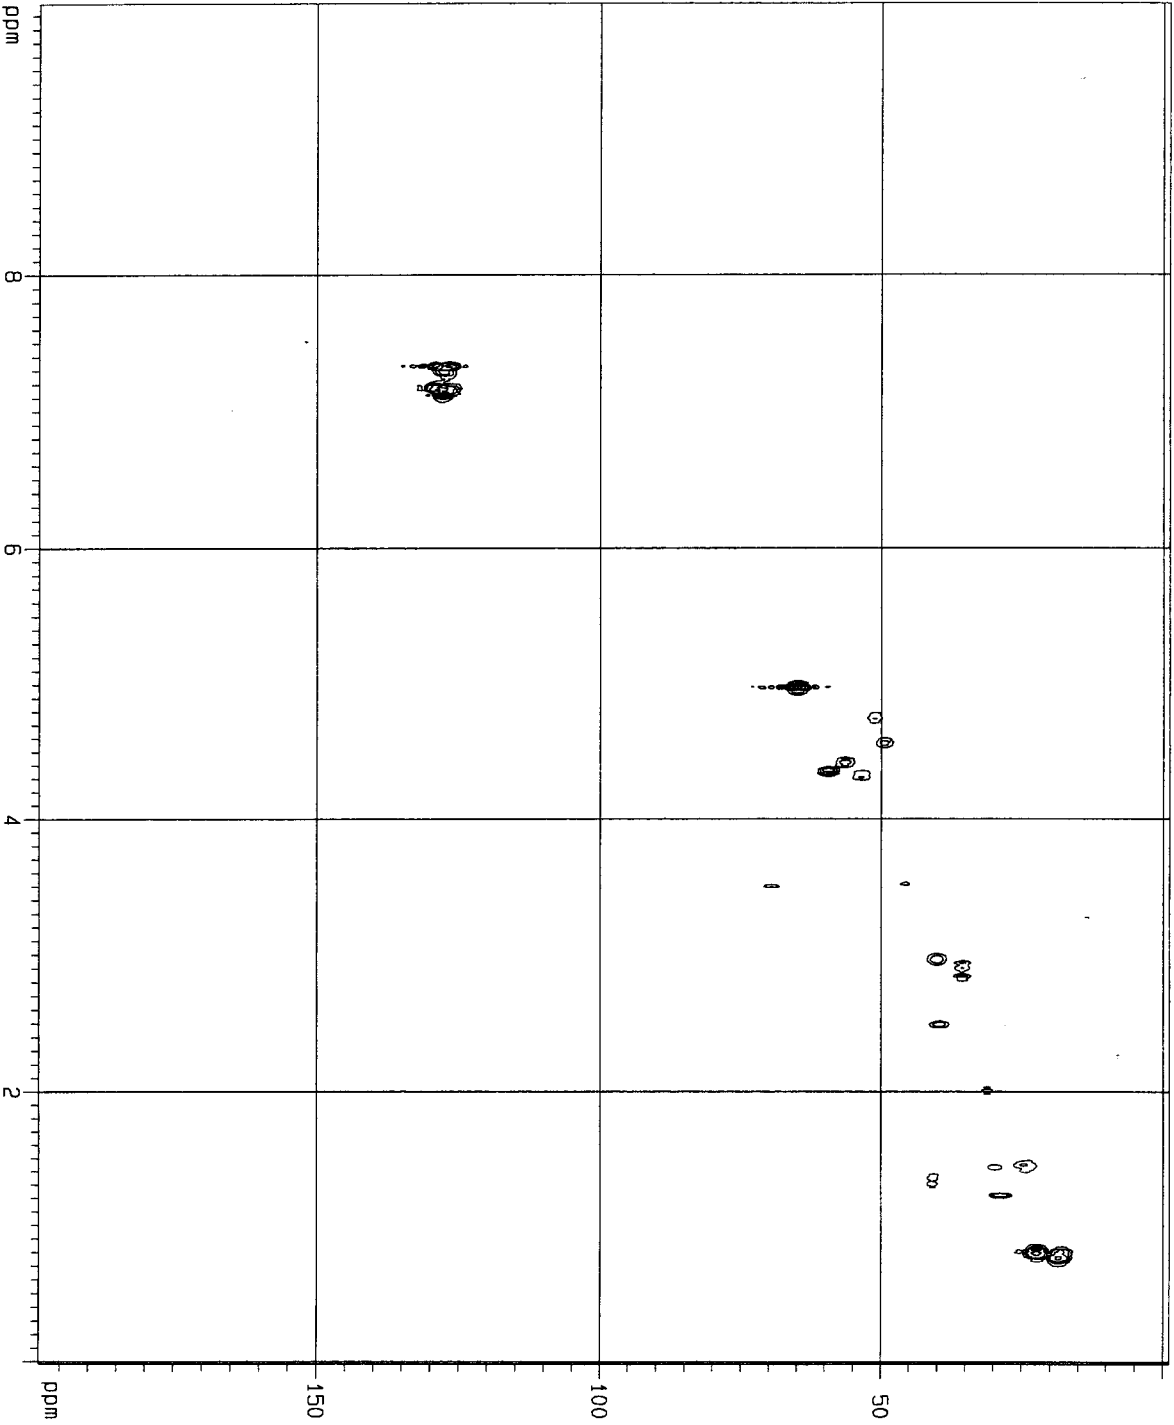

Current Data Param

NAME x]b-4-235-600  
EXPNO 12  
PROCNO 1

Date\_ 20040302  
Time 20.46  
INSTRUM spect  
PROBHD 5 mm 1B1 H1/  
PULPROG mv495  
TD 2048  
SOLVENT CHCl3  
NS 30  
DS 4  
SHH 6009.615 Hz  
FIDRES 2.324382 Hz  
AQ 0.17044356 sec  
RG 32758  
DM 83.200 us  
DE 6.00 us  
TE 310.0 K  
CNS12 145.0000000  
d0 0.000000000 sec  
d1 1.500000000 sec  
d2 0.00344828 sec  
d12 0.000020000 sec  
d13 0.000000000 sec  
d16 0.000500000 sec  
d20 0.00242528 sec  
d22 0.00001555 sec  
LNO 0.00001555 sec

\*\*\*\*\* CHANNEL f1 \*\*  
NUC1 1H  
P1 9.50 us  
P2 19.20 us  
PL1 0.00 dB  
PL2 0.00 dB  
SFO1 600.833041 MHz

\*\*\*\*\* CHANNEL f2 \*\*  
COPROG2 gprp  
NUC2 13C  
P1 13.50 us  
P2 100.00 us  
PCPD2 100.00 us  
PL1 9.00 dB  
PL2 12.00 dB  
SFO2 151.0938719 MHz

\*\*\*\*\* GRADIENT CHANNEL \*\*\*\*\*  
P16 1000.00 us

f1 - Acquisition param  
AQ 2.36  
TD 236  
SFO1 151.0939 MHz  
FIDRES 118.018298 Hz  
SM 199.992 DM

f2 - Processing param  
SI 1024  
SF 800.8300097 MHz  
WDW SINE  
SSB 0  
LB 0.00 Hz  
GB 0  
PC 1.00

f1 - Processing param  
SI 1024  
MC2 OF  
NUC2 13C  
KOR SINE  
SSB 0  
LB 0.00 Hz  
GB 0

2D NMR p10c param  
CX2 18.00 cm  
CX1 15.00 cm  
F2P10 9.985 DM  
F2P10 5999.29 Hz  
F2PH1 -0.017 DM  
F2PH1 -10.32 Hz  
F1P10 198.643 DM  
F1P10 30041.04 Hz  
F1PH1 -1.128 DM  
F1PH1 -170.47 Hz  
F2P9CH 0.55568 DM  
F2P9CH 333.86792 Hz  
F2P9CH 13.33145 DM  
F1H2CH 2014.10059 Hz

S44  
**Ch<sub>2</sub>GS**  
**H<sub>2</sub>BC**

xj0-4-235, DMSO-d6, NMBC, 600MHZ, Z-GS

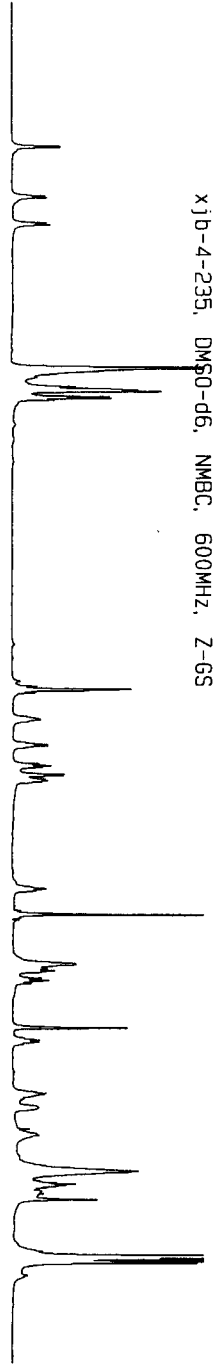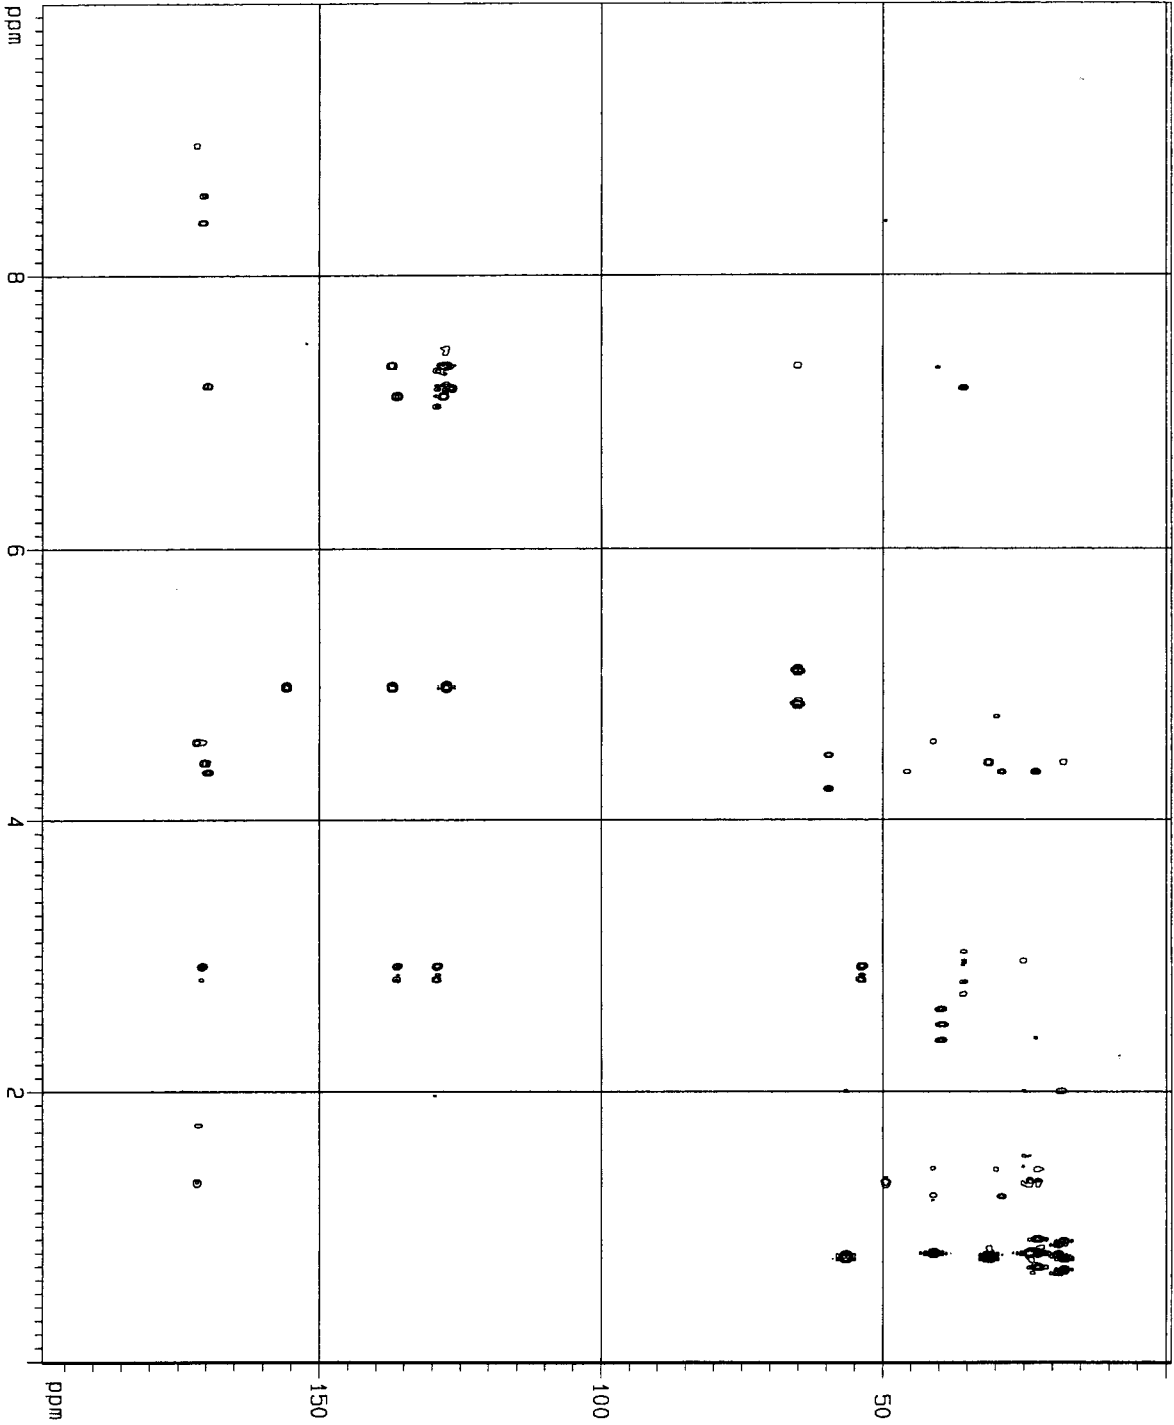

Current Data Parameters  
 NAME xj0-4-235-500  
 EXPNO 1122  
 PROCNO 1

F2 - Acquisition Parameters

Date\_ 20040303  
 Time 0.23  
 INSTRUM spect  
 PROBHD 5 mm 1H1 H/  
 PULPROG zgpg30  
 TD 4096  
 SFO1 600.136451 MHz  
 NS 80  
 DS 4  
 SHH 6009.615 Hz  
 FIDRES 1.467191 Hz  
 AQ 0.3409372 sec  
 PG 32768  
 DM 83.200 usec  
 DE 6.00 usec  
 TE 310.0 K  
 D0 0.0000300 sec  
 O1 1.00000000 sec  
 O6 0.00003000 sec  
 O13 0.00050000 sec  
 O16 0.00010000 sec  
 INO 0.00010000 sec

\*\*\*\*\* CHANNEL f1 \*\*\*\*\*  
 NUC1 1H  
 P1 9.60 usec  
 P2 19.20 usec  
 PL1 0.00 dB  
 SFO1 600.8330041 MHz

\*\*\*\*\* CHANNEL f2 \*\*\*\*\*  
 NUC2 13C  
 P3 13.50 usec  
 PL2 0.00 dB  
 SFO2 151.0938719 MHz  
 \*\*\*\*\* GRADIENT CHANNEL \*\*\*\*\*  
 P16 1000.00 usec

F1 - Acquisition parameters  
 NDD 2  
 TD 256  
 SFO1 151.0938 MHz  
 FIDRES 118.013398 Hz  
 SM 199.952 DDM

F2 - Processing parameters  
 SI 1024  
 SF 600.8300065 MHz  
 WDW SINE  
 SSB 0  
 LB 0.00 Hz  
 GB 0  
 PC 1.00

F1 - Processing parameter  
 SI 2048  
 NC2 OF  
 SF 151.0789062 MHz  
 MDW SINE  
 SSB 0  
 LB 0.00 Hz  
 GB 0

2D NMR plot parameters  
 CX2 18.00 cm  
 CX1 15.00 cm  
 F2RLO 9.590 ppm  
 F2LLO 6002.32 Hz  
 F2PHI -0.012 ppm  
 F2HT -7.30 Hz  
 F1RLO 199.044 ppm  
 F1LLO 30071.40 Hz  
 F1PHI -0.327 ppm  
 F1HT -140.11 Hz  
 F2PRCK 0.55568 ppm/cm  
 F2HZCK 333.86792 Hz/cm  
 F1PRCK 13.3145 ppm/cm  
 F1HZCK 2014.10059 Hz/cm

S45  
**ObzGS**  
 COSY

xj1b-4-235, dmso-d6, cosy, rt., 600MHz, Z-GS

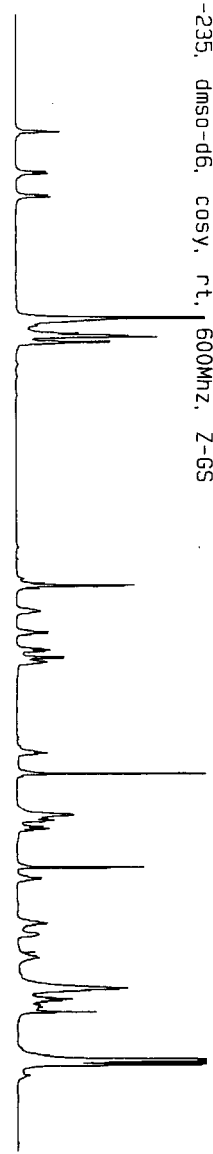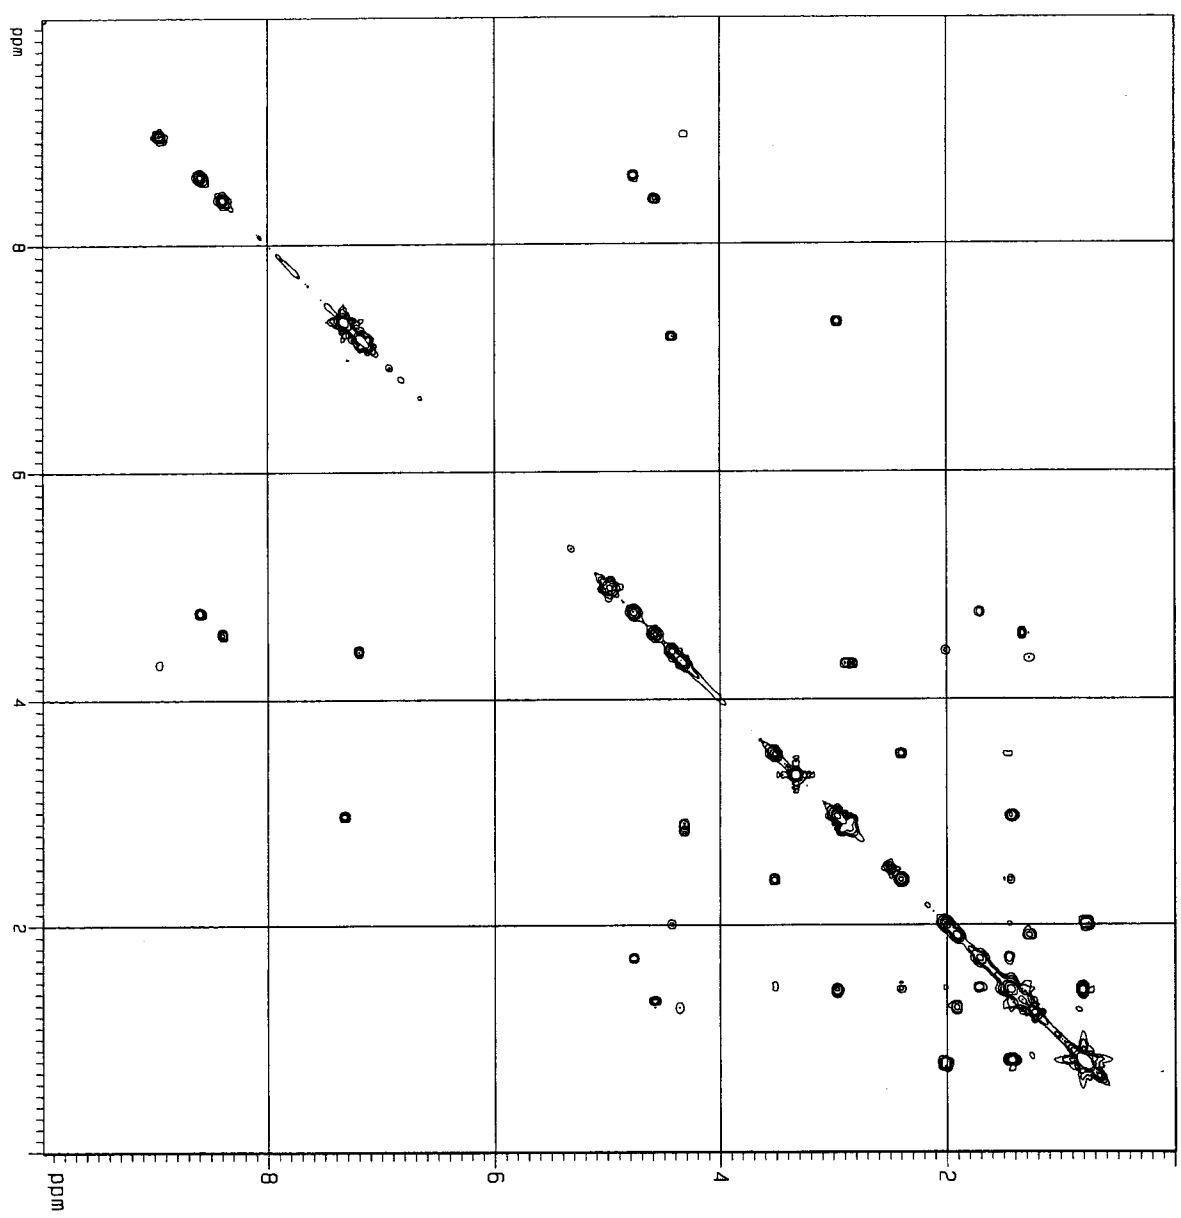

Current Data Parameters  
 NAME xj1b-4-235-600  
 EXPNO 11  
 PROCNO 1

F2 - Acquisition Parameters  
 Date\_ 20040302  
 Time 19.29

INSTRUM spect  
 PROBHD 5 mm TBI 1H/  
 PULPROG cosy  
 TD 1024  
 SOLVENT CDCl3  
 NS 16  
 DS 16  
 SH 6009.615 Hz  
 FIDRES 5.866765 Hz  
 AQ 0.0852468 sec

RG 100  
 DM 83.200 usec  
 DE 6.00 usec  
 TE 290.0 K  
 D0 0.00000300 sec  
 D1 1.000000000 sec  
 INO 0.00016540 sec

\*\*\*\*\* CHANNEL f1 \*\*\*\*\*  
 NUC1 1H  
 P0 8.20 usec  
 P1 8.20 usec  
 PL1 0.00 dB  
 SF01 600.8330041 MHz

F1 - Acquisition Parameters  
 MD 1  
 TD 256  
 SF01 600.833 MHz  
 FIDRES 23.475060 Hz  
 SW 10.002 ppm

F2 - Processing parameters  
 SI 512  
 SF 600.8300050 MHz  
 MDW SINE  
 SSB 0  
 LB 0.00 Hz  
 GB 0  
 PC 1.00

F1 - Processing parameters  
 SI 512  
 MC2 OF  
 SF 600.8300055 MHz  
 MDW SINE  
 SSB 0  
 LB 0.00 Hz  
 GB 0

2D NMR plot parameters  
 CX2 15.00 cm  
 CX1 15.00 cm  
 F2PL0 9.991 ppm  
 F2L0 6002.96 Hz  
 F2PH1 -0.011 ppm  
 F2H1 -6.56 Hz  
 F1PL0 9.992 ppm  
 F1L0 6003.42 Hz  
 F1PH1 -0.010 ppm  
 F1H1 -6.19 Hz

F2PNUCM 0.66681 ppm/cm  
 F2HZCM 400.64105 Hz/cm  
 F1PNUCM 0.66681 ppm/cm  
 F1HZCM 400.64105 Hz/cm

S46  
**ChBr<sub>2</sub>GS**  
**NOESY**

xj-b-4-235, DMSO, rt, NOESY, 600MHZ

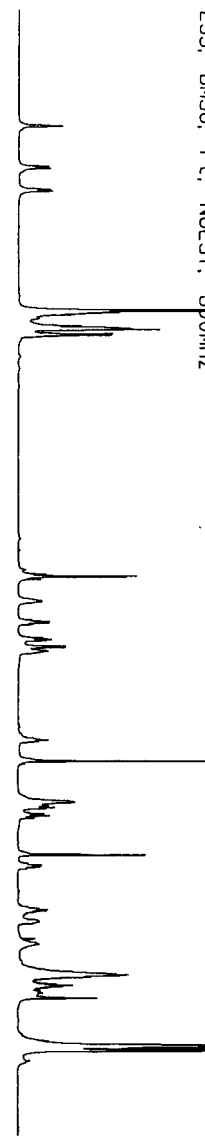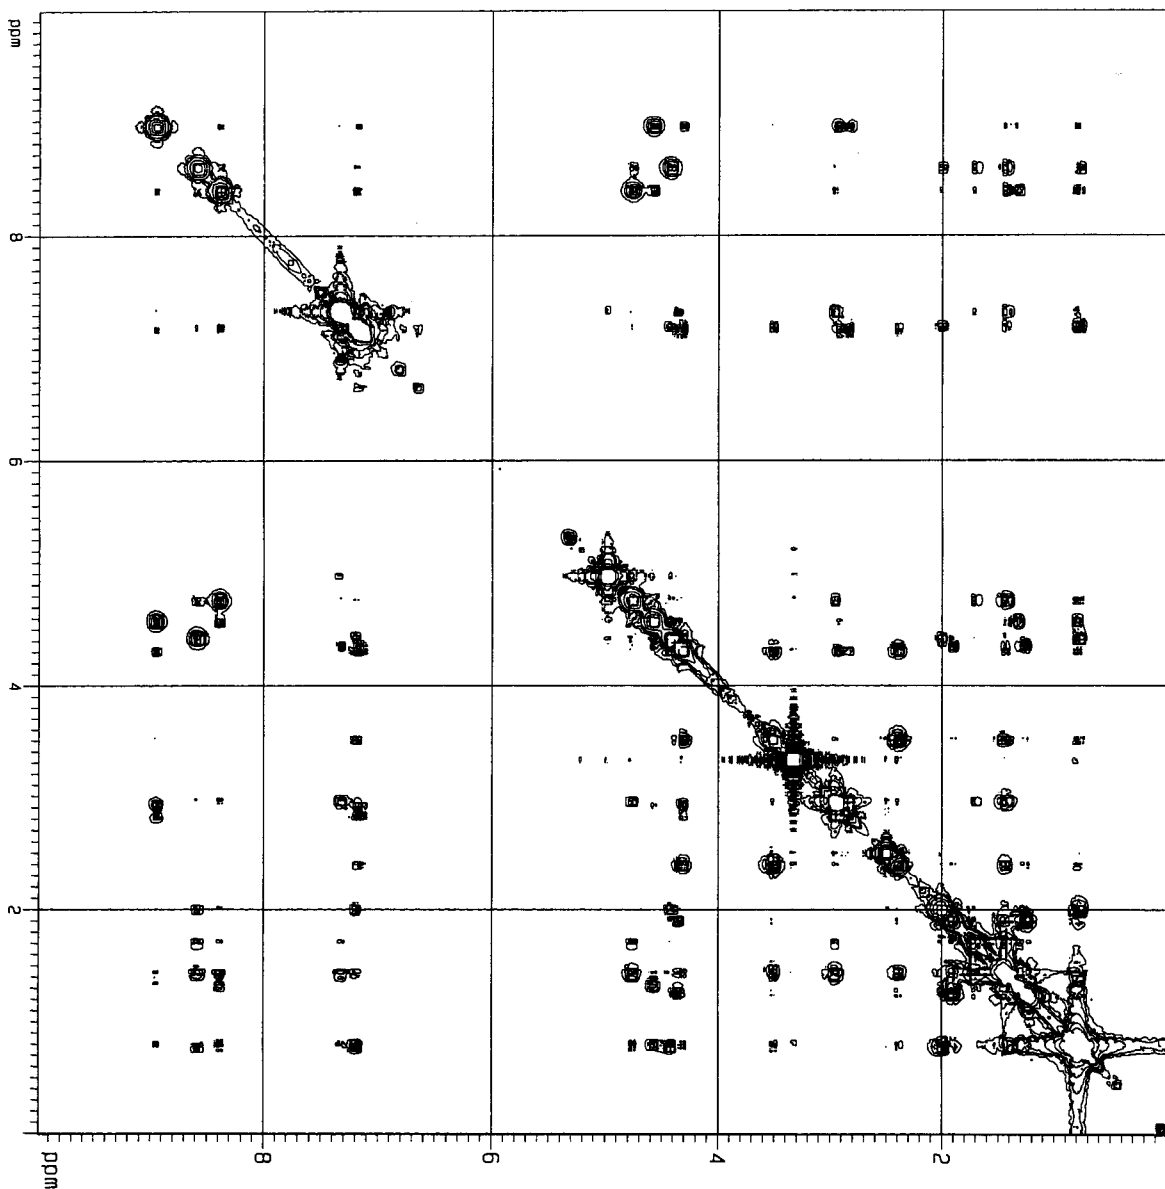

Current Data Parameters  
 Name xj-b-4-235-600  
 ExpNo 1111  
 ProcnO 1

F2 - Acquisition Parameters  
 Date\_ 20040303  
 Time 18.01  
 INSTRM spect  
 PROBD 5 mm TB1 1H/  
 PULPROG noesy1d  
 TD 1024  
 SOLVENT CDCl3  
 NS 16  
 DS 15  
 SFO1 600.615 Hz  
 FIDRES 5.968765 Hz  
 AQ 0.0952468 sec  
 RG 300  
 DM 83.200 usec  
 DE 6.00 usec  
 TE 290.0 K  
 TD 0.00000300 sec  
 D1 1.00000000 sec  
 DB 0.34595959 sec  
 INO 0.00008320 sec

Channel f1  
 NUC1 1H  
 P1 9.00 usec  
 PL1 0.00 dB  
 SFO1 600.830041 MHz

F1 - Acquisition Parameters  
 NDO 2  
 TD 256  
 SFO1 600.833 MHz  
 FIDRES 23.475060 Hz  
 SW 10.002 ppm

F2 - Processing Parameters  
 SI 1024  
 SF 600.830055 MHz  
 NDN SINE  
 SSB 0  
 LB 0.00 Hz  
 GB 0  
 PC 1.00

F1 - Processing Parameters  
 SI 1024  
 TPPI  
 MC2 600.830058 MHz  
 SF SINE  
 NDN SINE  
 SSB 0  
 LB 0.00 Hz  
 GB 0

2D NMR plot parameters  
 CX2 15.00 cm  
 CX1 15.00 cm  
 F2PUL 9.992 ppm  
 F2LO 6003.46 Hz  
 F2PHI -0.010 ppm  
 F2H1 -6.16 Hz  
 F1PUL 9.992 ppm  
 F1LO 6003.21 Hz  
 F1PHI -0.011 ppm  
 F1H1 -6.41 Hz

F2PUL 0.65681 ppm/cm  
 F2H2CM 400.64105 Hz/cm  
 F1PUL 0.65681 ppm/cm  
 F1H2CM 400.64105 Hz/cm

xj10-4-235, DMSO-d6, ROESY, rt, 600MHZ

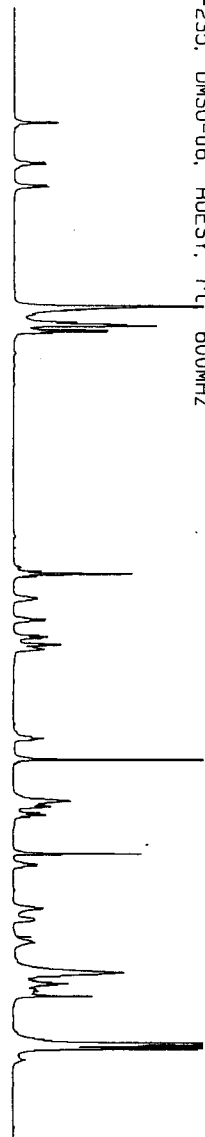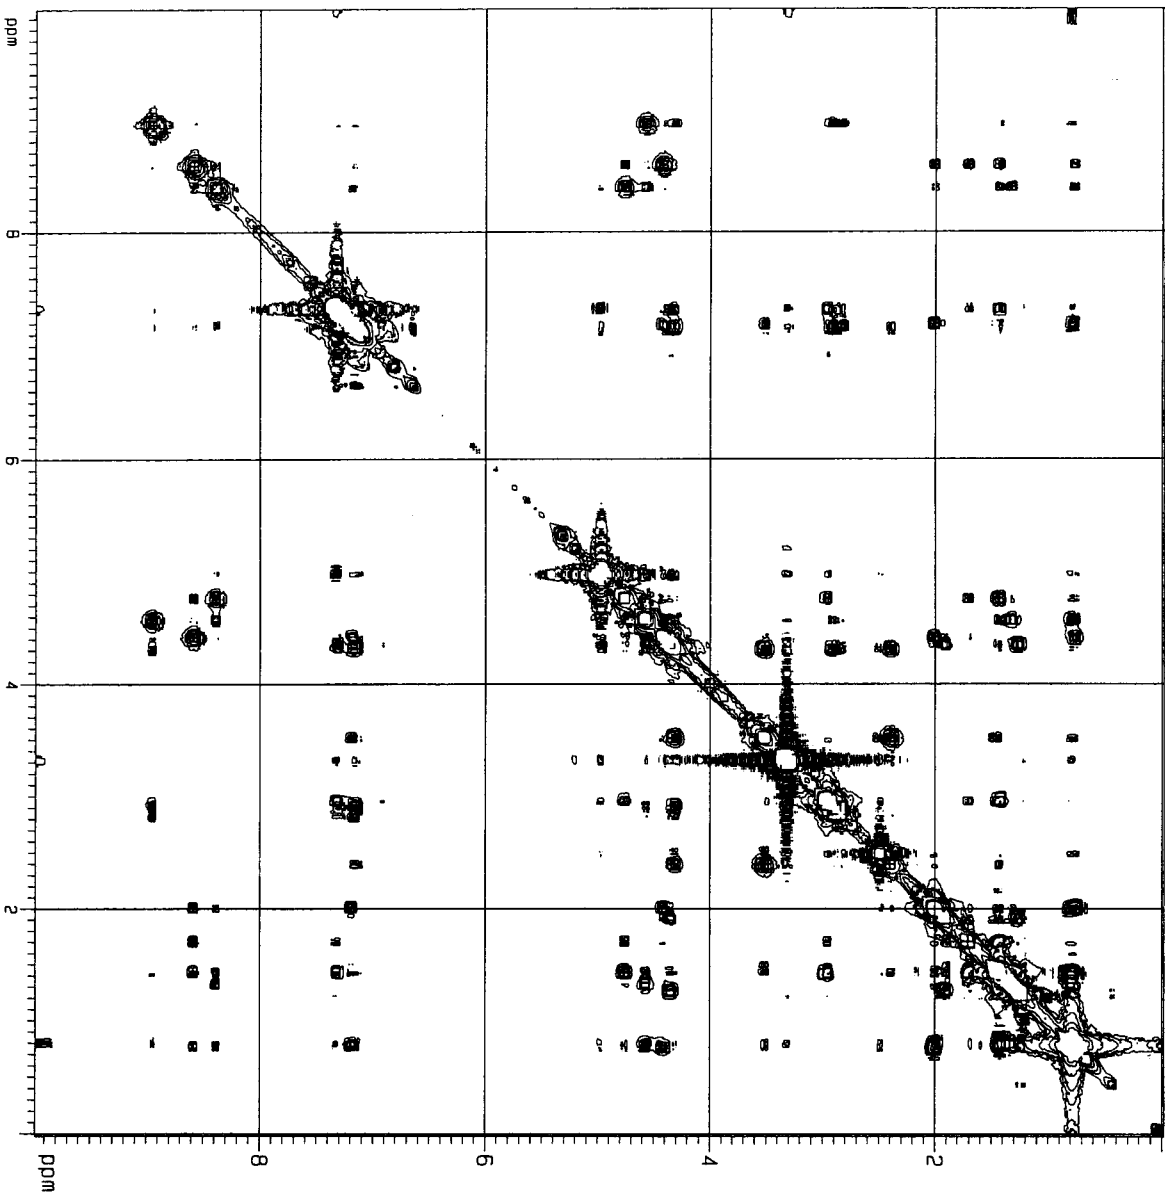

Current Data Parameters  
 NAME xj10-4-235-600  
 EXPNO 2222  
 PROCNO 1

F2 - Acquisition Parameters

Date\_ 20040304  
 Time 2.16  
 INSTRUM spect  
 PROBHD 5 mm TAI 1H/  
 PULPROG roesy1d  
 TD 1024  
 SOLVENT CDCl3  
 NS 80  
 DS 16  
 SFO1 6009.615 Hz  
 SFO2 5.868765 Hz  
 FIDRES 0.0852468 sec  
 AQ 300  
 RG 300  
 DM 83.200 usec  
 DE 6.00 usec  
 TE 290.0 K  
 D0 0.00000300 sec  
 D1 1.00000000 sec  
 d12 0.00002000 sec  
 INO 0.00008320 sec

CHANNEL f1

NUC1 1H  
 P1 9.00 usec  
 P15 250000.00 usec  
 PL1 0.00 dB  
 PL11 24.00 dB  
 SFO1 600.8330041 MHz

F1 - Acquisition Parameters

NUO 2  
 TD 256  
 SFO1 600.833 MHz  
 FIDRES 23.475060 Hz  
 SM 10.002 ppm

F2 - Processing Parameters

SI 1024  
 SF 600.8300115 MHz  
 MDW SINE  
 SSB 0  
 LB 0.00 Hz  
 GB 0  
 PC 0.10

F1 - Processing Parameters

SI 1024  
 MC2 TPEP1  
 SF 600.8300119 MHz  
 MDW SINE  
 SSB 0  
 LB 0.00 Hz  
 GB 0

2D NMR plot parameters

CX2 15.00 cm  
 CX1 15.00 cm  
 F2H0 9.982 ppm  
 F2L0 5997.49 Hz  
 F2PH1 -0.020 ppm  
 F2H1 -12.13 Hz  
 F1H0 9.981 ppm  
 F1L0 5997.10 Hz  
 F1PH1 -0.021 ppm  
 F1H1 -12.51 Hz  
 F2PRICK 0.66681 ppm/cm  
 F2VZCK 400.64105 Hz/cm  
 F1PRICK 0.66681 ppm/cm  
 F1VZCK 400.64105 Hz/cm

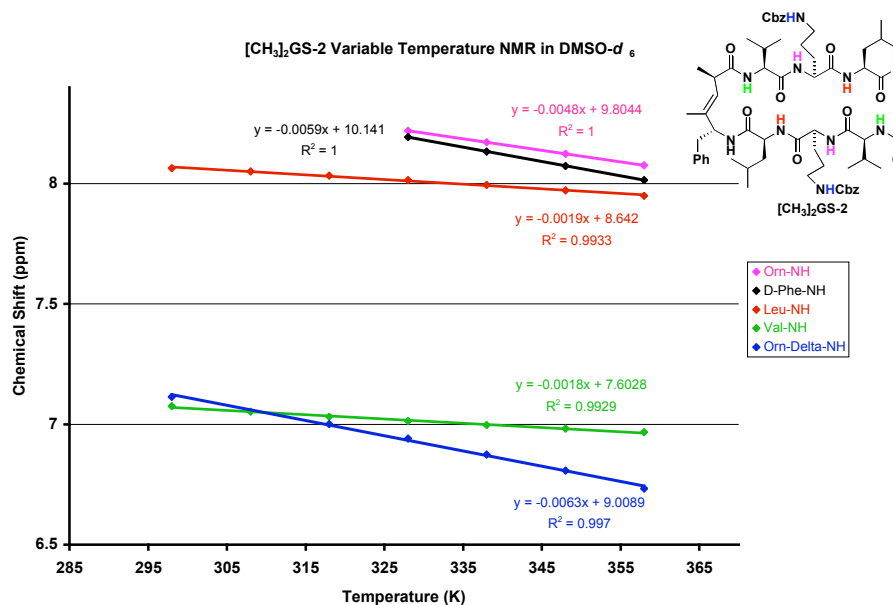

**Figure 1.** Amide proton chemical shift dependence on temperature for a solution of **10** in DMSO-*d*<sub>6</sub>

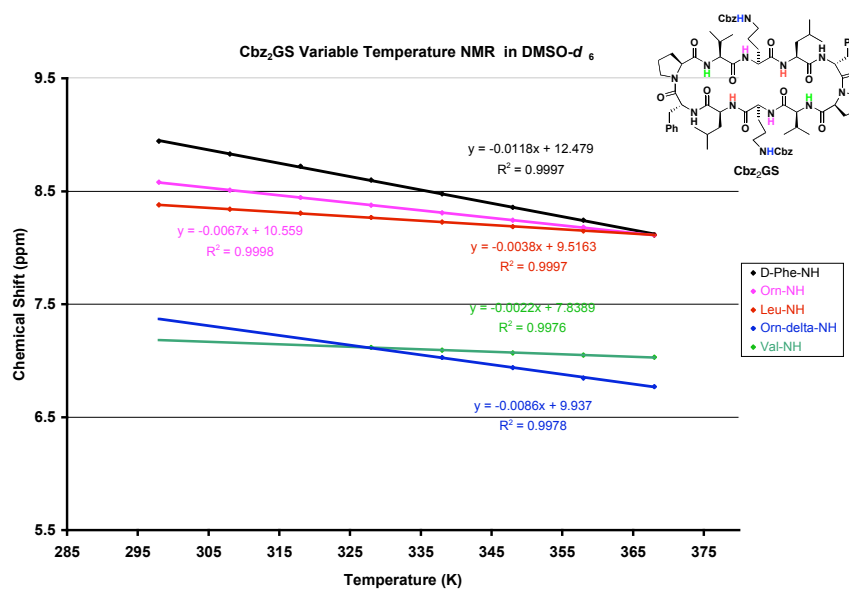

**Figure 2.** Amide proton chemical shift dependence on temperature for a solution of **Cbz<sub>2</sub>GS** in DMSO-*d*<sub>6</sub>.
